# Supplementary material for: Three-decadal dynamics of mid-channel bars in downstream of theThree Gorges Dam, China
Source: Copernicus journal article supplement (doi:10.5194/hess-2019-69), 2019-03-14
Supplement: Supplementary file 1 [file Tables S1 & S2.xlsx]

## Sheet: Table S1
MCB ID	Scene infomation	Distance to TGD	Type	Area (km2)	Width	Length	LWR
ID_11903819850111002	LC08_119038_20131210	1559.06	T2	4.93554	2559.57	9160.97	3.57911
ID_11903819850111002	LC08_119038_20140316	1559.06	T2	12.2801	5280.69	9740.61	1.84457
ID_11903819850111002	LC08_119038_20141229	1559.06	T2	4.99122	2551.2	9137.18	3.58152
ID_11903819850111002	LC08_119038_20151216	1559.06	T2	7.42275	2916.72	9245.11	3.1697
ID_11903819850111002	LC08_119038_20160101	1559.06	T2	6.31668	2723	9165.31	3.36589
ID_11903819850111002	LC08_119038_20160305	1559.06	T2	4.93352	2558.15	9129.95	3.56897
ID_11903819850111002	LC08_119038_20170308	1559.06	T2	4.48415	2526.69	9102.96	3.60272
ID_11903819850111002	LC08_119038_20171205	1559.06	T2	13.183	5275.78	9848.63	1.86676
ID_11903819850111002	LC08_119038_20171221	1559.06	T2	12.2005	5264.95	9336.97	1.77342
ID_11903819850111002	LC08_119038_20180223	1559.06	T2	6.84733	2582.62	9175.59	3.55282
ID_11903819850111002	LC08_119038_20180327	1559.06	T2	4.41912	2513.41	9048.42	3.60006
ID_11903819850111002	LE07_119038_19991228	1559.06	T2	1.93537	1176.99	2396.03	2.03573
ID_11903819850111002	LE07_119038_20000301	1559.06	T2	2.54711	2033.55	4485.64	2.20582
ID_11903819850111002	LE07_119038_20000317	1559.06	T2	4.56052	5186.62	7394.19	1.42563
ID_11903819850111002	LE07_119038_20001128	1559.06	T2	4.45642	3161.54	8409.18	2.65983
ID_11903819850111002	LE07_119038_20010115	1559.06	T2	2.24303	2092.99	5693.18	2.72012
ID_11903819850111002	LE07_119038_20010304	1559.06	T2	2.26416	1303.04	4555.15	3.49578
ID_11903819850111002	LE07_119038_20011115	1559.06	T2	6.9948	6058.96	8242.7	1.36041
ID_11903819850111002	LE07_119038_20020102	1559.06	T2	5.22036	4859.04	7598.07	1.5637
ID_11903819850111002	LE07_119038_20020219	1559.06	T2	2.94745	1969.4	4617.99	2.34487
ID_11903819850111002	LE07_119038_20021118	1559.06	T2	7.59792	5215.61	10433	2.00034
ID_11903819850111002	LE07_119038_20030121	1559.06	T2	4.90239	4763.73	7429.94	1.55969
ID_11903819850111002	LE07_119038_20030206	1559.06	T2	3.55473	2497.47	6282.6	2.51559
ID_11903819850111002	LE07_119038_20121129	1559.06	T2	8.5148	4166.31	9155.27	2.19746
ID_11903819850111002	LT05_119038_19850111	1559.06	T2	1.93915	1308.21	4252.97	3.25099
ID_11903819850111002	LT05_119038_19860215	1559.06	T2	1.52307	936.1	2526.45	2.69891
ID_11903819850111002	LT05_119038_19860303	1559.06	T2	1.74287	1088.34	4219.04	3.87659
ID_11903819850111002	LT05_119038_19870202	1559.06	T2	1.92884	1142.27	4198.09	3.67522
ID_11903819850111002	LT05_119038_19880120	1559.06	T2	3.62307	5253.76	5518.81	1.05045
ID_11903819850111002	LT05_119038_19881103	1559.06	T2	2.21353	2278.97	8355.35	3.66628
ID_11903819850111002	LT05_119038_19881205	1559.06	T2	4.40868	4702.77	8540.21	1.816
ID_11903819850111002	LT05_119038_19890327	1559.06	T2	1.78885	1129.54	4190.95	3.71032
ID_11903819850111002	LT05_119038_19891208	1559.06	T2	1.65913	1003.83	4128.43	4.11267
ID_11903819850111002	LT05_119038_19900226	1559.06	T2	2.03923	2088.74	6487.57	3.10597
ID_11903819850111002	LT05_119038_19910317	1559.06	T2	1.85209	1206.24	4000.52	3.31653
ID_11903819850111002	LT05_119038_19911112	1559.06	T2	2.40511	4171.39	7834.12	1.87806
ID_11903819850111002	LT05_119038_19911214	1559.06	T2	1.68511	1139.7	2371.01	2.08038
ID_11903819850111002	LT05_119038_19920115	1559.06	T2	2.02005	2184.98	7896.3	3.61389
ID_11903819850111002	LT05_119038_19920216	1559.06	T2	5.90198	4763.62	8760.67	1.83908
ID_11903819850111002	LT05_119038_19921216	1559.06	T2	1.75576	1463.73	6360.48	4.34538
ID_11903819850111002	LT05_119038_19930202	1559.06	T2	2.38049	2278.11	8133.74	3.57038
ID_11903819850111002	LT05_119038_19931101	1559.06	T2	3.19793	5123.87	8114.58	1.58368
ID_11903819850111002	LT05_119038_19931219	1559.06	T2	2.08917	2208.73	7414.89	3.35708
ID_11903819850111002	LT05_119038_19940325	1559.06	T2	4.86652	5766.87	8029.63	1.39237
ID_11903819850111002	LT05_119038_19941206	1559.06	T2	2.23386	1764.47	8669.38	4.9133
ID_11903819850111002	LT05_119038_19941222	1559.06	T2	2.23479	2258.24	8509.46	3.76819
ID_11903819850111002	LT05_119038_19950107	1559.06	T2	1.90268	1577.21	5852.75	3.71083
ID_11903819850111002	LT05_119038_19951209	1559.06	T2	4.04258	3077.93	8911.34	2.89524
ID_11903819850111002	LT05_119038_19960110	1559.06	T2	2.11812	2406.99	7943.79	3.3003
ID_11903819850111002	LT05_119038_19961211	1559.06	T2	3.04697	4155.49	8575.75	2.06371
ID_11903819850111002	LT05_119038_19970112	1559.06	T2	2.19205	1301.8	4484.11	3.44454
ID_11903819850111002	LT05_119038_19971214	1559.06	T2	3.61968	4703.75	8225.5	1.74871
ID_11903819850111002	LT05_119038_19980131	1559.06	T2	1.97024	1266.9	2331.25	1.84012
ID_11903819850111002	LT05_119038_19981217	1559.06	T2	8.5702	5448.96	9183.75	1.68541
ID_11903819850111002	LT05_119038_19990203	1559.06	T2	4.62907	5130.43	7911.89	1.54215
ID_11903819850111002	LT05_119038_19990219	1559.06	T2	3.26948	4932.27	7476.31	1.5158
ID_11903819850111002	LT05_119038_19991220	1559.06	T2	8.97931	5375.11	10306.8	1.91751
ID_11903819850111002	LT05_119038_20001104	1559.06	T2	2.33746	1311.85	4516.38	3.44277
ID_11903819850111002	LT05_119038_20001206	1559.06	T2	2.59991	2010.03	4785.54	2.38083
ID_11903819850111002	LT05_119038_20001222	1559.06	T2	5.90651	5234.78	7574.64	1.44698
ID_11903819850111002	LT05_119038_20010208	1559.06	T2	6.29143	5453.95	7757.23	1.42231
ID_11903819850111002	LT05_119038_20010312	1559.06	T2	2.96315	2467.23	4633.92	1.87819
ID_11903819850111002	LT05_119038_20020211	1559.06	T2	7.53729	4559.65	9141.43	2.00485
ID_11903819850111002	LT05_119038_20021110	1559.06	T2	3.41798	2417.87	6194.89	2.56213
ID_11903819850111002	LT05_119038_20030113	1559.06	T2	3.27643	2506.81	6609.41	2.63658
ID_11903819850111002	LT05_119038_20031113	1559.06	T2	6.40419	5625.12	8136.32	1.44643
ID_11903819850111002	LT05_119038_20031215	1559.06	T2	3.59909	2947.89	5397.62	1.83101
ID_11903819850111002	LT05_119038_20040304	1559.06	T2	10.5222	5306.84	10312.9	1.94332
ID_11903819850111002	LT05_119038_20041115	1559.06	T2	5.9964	5281.5	8130.22	1.53938
ID_11903819850111002	LT05_119038_20050219	1559.06	T2	3.26709	2420.47	5280.67	2.18167
ID_11903819850111002	LT05_119038_20050307	1559.06	T2	6.27357	3137.28	8731.88	2.78326
ID_11903819850111002	LT05_119038_20050323	1559.06	T2	9.994	5929.97	9241.86	1.5585
ID_11903819850111002	LT05_119038_20061223	1559.06	T2	7.79732	3233.13	9353.32	2.89296
ID_11903819850111002	LT05_119038_20070108	1559.06	T2	8.97827	4245.76	9231.82	2.17436
ID_11903819850111002	LT05_119038_20070124	1559.06	T2	5.32376	2918.13	7511.01	2.57391
ID_11903819850111002	LT05_119038_20070329	1559.06	T2	3.9333	2469.46	6729.27	2.72499
ID_11903819850111002	LT05_119038_20080212	1559.06	T2	4.60323	2538.04	7316.49	2.88273
ID_11903819850111002	LT05_119038_20080228	1559.06	T2	5.2695	2811.82	7586.63	2.69812
ID_11903819850111002	LT05_119038_20090113	1559.06	T2	9.96055	4680.64	9831.01	2.10035
ID_11903819850111002	LT05_119038_20101202	1559.06	T2	4.16514	2538.06	7525.61	2.9651
ID_11903819850111002	LT05_119038_20101218	1559.06	T2	7.61283	4259.67	9365.88	2.19873
ID_11903819850111002	LT05_119038_20110204	1559.06	T2	9.46262	5576.24	9310.81	1.66973
ID_11903819850111003	LC08_119038_20131210	1478.59	T1	1.21669	803.463	3279.83	4.08212
ID_11903819850111003	LC08_119038_20140316	1478.59	T1	1.45645	829.099	3325.89	4.01145
ID_11903819850111003	LC08_119038_20141229	1478.59	T1	1.18003	804.06	3225.71	4.01177
ID_11903819850111003	LC08_119038_20151216	1478.59	T1	1.13497	803.078	2993.07	3.727
ID_11903819850111003	LC08_119038_20160101	1478.59	T1	1.14417	802.916	3078.02	3.83355
ID_11903819850111003	LC08_119038_20160305	1478.59	T1	1.06903	802.916	2691.27	3.35188
ID_11903819850111003	LC08_119038_20170308	1478.59	T1	1.5422	812.007	3361.44	4.13967
ID_11903819850111003	LC08_119038_20171205	1478.59	T1	1.45327	813.05	3386	4.16456
ID_11903819850111003	LC08_119038_20171221	1478.59	T1	1.5259	808.383	3353.88	4.14888
ID_11903819850111003	LC08_119038_20180223	1478.59	T1	1.20283	796.809	3195.59	4.01049
ID_11903819850111003	LC08_119038_20180327	1478.59	T1	1.46494	803.379	3343.32	4.16157
ID_11903819850111003	LE07_119038_19991228	1478.59	T1	0.858472	762.019	2027.76	2.66103
ID_11903819850111003	LE07_119038_20000301	1478.59	T1	1.35289	806.716	2922.64	3.62288
ID_11903819850111003	LE07_119038_20000317	1478.59	T1	1.26899	806.706	2901.22	3.59638
ID_11903819850111003	LE07_119038_20001128	1478.59	T1	0.870551	724.157	2046.26	2.82572
ID_11903819850111003	LE07_119038_20010115	1478.59	T1	0.842588	717.145	2068.83	2.88482
ID_11903819850111003	LE07_119038_20010304	1478.59	T1	1.03741	740.535	2200.75	2.97184
ID_11903819850111003	LE07_119038_20011115	1478.59	T1	1.01102	725.627	2194.47	3.02424
ID_11903819850111003	LE07_119038_20020102	1478.59	T1	1.15661	773.323	2923.11	3.77994
ID_11903819850111003	LE07_119038_20020219	1478.59	T1	1.04679	808.472	2941.53	3.63838
ID_11903819850111003	LE07_119038_20021118	1478.59	T1	1.15228	825.275	2976.51	3.60669
ID_11903819850111003	LE07_119038_20030121	1478.59	T1	1.14769	820.537	2969.14	3.61853
ID_11903819850111003	LE07_119038_20030206	1478.59	T1	1.11972	815.168	2927.21	3.59093
ID_11903819850111003	LE07_119038_20121129	1478.59	T1	1.16474	763.406	2915.41	3.81896
ID_11903819850111003	LT05_119038_19850111	1478.59	T1	0.445819	485.654	1375.63	2.83254
ID_11903819850111003	LT05_119038_19860215	1478.59	T1	0.0571005	193.157	464.265	2.40356
ID_11903819850111003	LT05_119038_19860303	1478.59	T1	0.436309	487.022	1220.89	2.50684
ID_11903819850111003	LT05_119038_19870202	1478.59	T1	0.354539	514.107	1010.5	1.96555
ID_11903819850111003	LT05_119038_19880120	1478.59	T1	0.885881	588.198	2144.24	3.64544
ID_11903819850111003	LT05_119038_19881103	1478.59	T1	0.887631	596.06	1993.93	3.34518
ID_11903819850111003	LT05_119038_19881205	1478.59	T1	1.40089	761.929	3256.98	4.27465
ID_11903819850111003	LT05_119038_19890327	1478.59	T1	0.143245	366.336	623.995	1.70334
ID_11903819850111003	LT05_119038_19891208	1478.59	T1	1.19639	692.929	2878.29	4.15381
ID_11903819850111003	LT05_119038_19900226	1478.59	T1	0.310414	530.37	968.882	1.8268
ID_11903819850111003	LT05_119038_19910317	1478.59	T1	0.295249	497.792	940.402	1.88915
ID_11903819850111003	LT05_119038_19911112	1478.59	T1	0.536025	627.712	1192.7	1.90008
ID_11903819850111003	LT05_119038_19911214	1478.59	T1	0.692319	626.476	1672.71	2.67003
ID_11903819850111003	LT05_119038_19920115	1478.59	T1	0.652235	649.694	1445.65	2.22513
ID_11903819850111003	LT05_119038_19920216	1478.59	T1	1.31263	746.556	3103.59	4.15721
ID_11903819850111003	LT05_119038_19921216	1478.59	T1	0.656912	620.877	1543.7	2.48633
ID_11903819850111003	LT05_119038_19930202	1478.59	T1	1.25904	747.3	3112.09	4.16445
ID_11903819850111003	LT05_119038_19931101	1478.59	T1	0.407214	582.234	975.686	1.67576
ID_11903819850111003	LT05_119038_19931219	1478.59	T1	0.593158	614.251	1522.79	2.4791
ID_11903819850111003	LT05_119038_19940325	1478.59	T1	1.15622	687.395	2398.6	3.4894
ID_11903819850111003	LT05_119038_19941206	1478.59	T1	0.680035	621.828	1536.71	2.47128
ID_11903819850111003	LT05_119038_19941222	1478.59	T1	0.620714	631.649	1540.82	2.43936
ID_11903819850111003	LT05_119038_19950107	1478.59	T1	0.510145	620.575	1147.33	1.84882
ID_11903819850111003	LT05_119038_19951209	1478.59	T1	1.11525	725.906	2364.44	3.25722
ID_11903819850111003	LT05_119038_19960110	1478.59	T1	0.75664	686.761	1616.66	2.35403
ID_11903819850111003	LT05_119038_19961211	1478.59	T1	1.11325	774.79	2227.74	2.87528
ID_11903819850111003	LT05_119038_19970112	1478.59	T1	0.994347	742.274	2058.31	2.77298
ID_11903819850111003	LT05_119038_19971214	1478.59	T1	1.02444	740.417	2049.89	2.76856
ID_11903819850111003	LT05_119038_19980131	1478.59	T1	0.547533	640.826	1421.62	2.21842
ID_11903819850111003	LT05_119038_19981217	1478.59	T1	1.33019	816.512	2943.25	3.60466
ID_11903819850111003	LT05_119038_19990203	1478.59	T1	1.15681	759.615	2570.47	3.38391
ID_11903819850111003	LT05_119038_19990219	1478.59	T1	1.15807	779.408	2878.97	3.69379
ID_11903819850111003	LT05_119038_19991220	1478.59	T1	0.973083	772.988	2226.52	2.88041
ID_11903819850111003	LT05_119038_20001104	1478.59	T1	0.764814	699.488	1929.45	2.75837
ID_11903819850111003	LT05_119038_20001206	1478.59	T1	1.24597	808.573	2920.94	3.61246
ID_11903819850111003	LT05_119038_20001222	1478.59	T1	1.35869	813.18	2938.26	3.6133
ID_11903819850111003	LT05_119038_20010208	1478.59	T1	1.15421	779.536	2911.65	3.73511
ID_11903819850111003	LT05_119038_20010312	1478.59	T1	0.898776	704.934	2068.78	2.93472
ID_11903819850111003	LT05_119038_20020211	1478.59	T1	1.30275	831.421	3380.93	4.06645
ID_11903819850111003	LT05_119038_20021110	1478.59	T1	1.04295	803.526	2908.09	3.61916
ID_11903819850111003	LT05_119038_20030113	1478.59	T1	1.49335	850.453	3335.45	3.92197
ID_11903819850111003	LT05_119038_20031113	1478.59	T1	1.22305	805.573	3008.06	3.73406
ID_11903819850111003	LT05_119038_20031215	1478.59	T1	1.23436	811.768	2980.8	3.67199
ID_11903819850111003	LT05_119038_20040304	1478.59	T1	1.53717	841.823	3385.49	4.02162
ID_11903819850111003	LT05_119038_20041115	1478.59	T1	1.14508	785.357	2978.14	3.79208
ID_11903819850111003	LT05_119038_20050219	1478.59	T1	1.41462	822.996	3311.07	4.02319
ID_11903819850111003	LT05_119038_20050307	1478.59	T1	1.50972	887.867	3318.26	3.73734
ID_11903819850111003	LT05_119038_20050323	1478.59	T1	1.36059	809.486	2974.22	3.6742
ID_11903819850111003	LT05_119038_20061223	1478.59	T1	1.36861	812.57	3312.5	4.07658
ID_11903819850111003	LT05_119038_20070108	1478.59	T1	1.41925	818.517	3312.34	4.04675
ID_11903819850111003	LT05_119038_20070124	1478.59	T1	1.20137	808.496	3274.65	4.0503
ID_11903819850111003	LT05_119038_20070329	1478.59	T1	1.43162	813.494	3297.25	4.0532
ID_11903819850111003	LT05_119038_20080212	1478.59	T1	1.09857	786.232	2990.55	3.80365
ID_11903819850111003	LT05_119038_20080228	1478.59	T1	1.31448	801.194	3271.76	4.0836
ID_11903819850111003	LT05_119038_20090113	1478.59	T1	1.42614	817.602	3343.56	4.08947
ID_11903819850111003	LT05_119038_20101202	1478.59	T1	1.58001	806.846	3320.27	4.11512
ID_11903819850111003	LT05_119038_20101218	1478.59	T1	1.6153	814.032	3356.68	4.12352
ID_11903819850111003	LT05_119038_20110204	1478.59	T1	1.36638	795.235	3262.82	4.10296
ID_11903819850111005	LC08_119038_20131210	1474.24	T2	4.30196	1416.31	4924.96	3.47733
ID_11903819850111005	LC08_119038_20140316	1474.24	T2	4.39986	1406.34	5042.25	3.58538
ID_11903819850111005	LC08_119038_20141229	1474.24	T2	4.2891	1381.92	4879.23	3.53076
ID_11903819850111005	LC08_119038_20151216	1474.24	T2	4.26105	1420.98	4900.67	3.44879
ID_11903819850111005	LC08_119038_20160101	1474.24	T2	4.26555	1396.88	4879.05	3.49283
ID_11903819850111005	LC08_119038_20160305	1474.24	T2	4.26555	1396.88	4879.05	3.49283
ID_11903819850111005	LC08_119038_20170308	1474.24	T2	4.48323	1398.05	5114.98	3.65864
ID_11903819850111005	LC08_119038_20171205	1474.24	T2	4.3766	1404.68	4945.92	3.52102
ID_11903819850111005	LC08_119038_20171221	1474.24	T2	4.44397	1408.07	5088.56	3.61384
ID_11903819850111005	LC08_119038_20180223	1474.24	T2	4.32548	1415.16	4912.57	3.47138
ID_11903819850111005	LC08_119038_20180327	1474.24	T2	4.40978	1406.53	5024.64	3.57237
ID_11903819850111005	LE07_119038_19991228	1474.24	T2	4.32654	1393.33	4967.66	3.56532
ID_11903819850111005	LE07_119038_20000301	1474.24	T2	4.4748	1398.58	5051.37	3.61178
ID_11903819850111005	LE07_119038_20000317	1474.24	T2	4.43306	1388.65	5020.86	3.61565
ID_11903819850111005	LE07_119038_20001128	1474.24	T2	4.2987	1373.54	4958.07	3.60971
ID_11903819850111005	LE07_119038_20010115	1474.24	T2	4.30883	1390.94	4947.2	3.55672
ID_11903819850111005	LE07_119038_20010304	1474.24	T2	4.36839	1387.81	4954.66	3.57012
ID_11903819850111005	LE07_119038_20011115	1474.24	T2	4.33124	1373.32	4995.32	3.63741
ID_11903819850111005	LE07_119038_20020102	1474.24	T2	4.39067	1372.49	5030.38	3.66514
ID_11903819850111005	LE07_119038_20020219	1474.24	T2	4.35134	1390.17	4948.78	3.55985
ID_11903819850111005	LE07_119038_20021118	1474.24	T2	4.34353	1367.83	4975.19	3.63728
ID_11903819850111005	LE07_119038_20030121	1474.24	T2	4.33449	1372.83	4978.3	3.6263
ID_11903819850111005	LE07_119038_20030206	1474.24	T2	4.33812	1372.57	4990.03	3.63554
ID_11903819850111005	LE07_119038_20121129	1474.24	T2	3.64154	1379.57	4744.55	3.43916
ID_11903819850111005	LT05_119038_19850111	1474.24	T2	4.31536	1352.34	4945.55	3.65704
ID_11903819850111005	LT05_119038_19860215	1474.24	T2	4.28718	1343.55	4856.08	3.61436
ID_11903819850111005	LT05_119038_19860303	1474.24	T2	4.35837	1360.49	4980.26	3.66063
ID_11903819850111005	LT05_119038_19870202	1474.24	T2	4.33687	1360.6	5000.26	3.67504
ID_11903819850111005	LT05_119038_19880120	1474.24	T2	4.4082	1363.95	5030.45	3.68816
ID_11903819850111005	LT05_119038_19881103	1474.24	T2	4.38359	1361.89	4982.7	3.65867
ID_11903819850111005	LT05_119038_19881205	1474.24	T2	4.47835	1381.34	5116.44	3.70396
ID_11903819850111005	LT05_119038_19890327	1474.24	T2	4.29692	1343.94	4848.45	3.60763
ID_11903819850111005	LT05_119038_19891208	1474.24	T2	4.42514	1383.5	5001.47	3.61509
ID_11903819850111005	LT05_119038_19900226	1474.24	T2	4.24057	1350.75	4881.52	3.61393
ID_11903819850111005	LT05_119038_19910317	1474.24	T2	4.2319	1352.39	4809.91	3.55659
ID_11903819850111005	LT05_119038_19911112	1474.24	T2	4.31666	1374.66	4928.92	3.58555
ID_11903819850111005	LT05_119038_19911214	1474.24	T2	4.33454	1373.76	4915.94	3.57846
ID_11903819850111005	LT05_119038_19920115	1474.24	T2	4.3949	1389.64	5021.95	3.61385
ID_11903819850111005	LT05_119038_19920216	1474.24	T2	4.47758	1387.58	5059.56	3.64633
ID_11903819850111005	LT05_119038_19921216	1474.24	T2	4.3211	1373.99	4899.1	3.5656
ID_11903819850111005	LT05_119038_19930202	1474.24	T2	4.49308	1392.73	5052.75	3.62793
ID_11903819850111005	LT05_119038_19931101	1474.24	T2	4.25593	1361.53	4864.43	3.57276
ID_11903819850111005	LT05_119038_19931219	1474.24	T2	4.30627	1382.39	4897.87	3.54305
ID_11903819850111005	LT05_119038_19940325	1474.24	T2	4.43435	1401.34	4974.92	3.55013
ID_11903819850111005	LT05_119038_19941206	1474.24	T2	4.29278	1378.82	4905.34	3.55765
ID_11903819850111005	LT05_119038_19941222	1474.24	T2	4.27245	1367.76	4785.73	3.49896
ID_11903819850111005	LT05_119038_19950107	1474.24	T2	4.27338	1374.84	4839.51	3.52004
ID_11903819850111005	LT05_119038_19951209	1474.24	T2	4.41374	1388.72	4988.35	3.59205
ID_11903819850111005	LT05_119038_19960110	1474.24	T2	4.32807	1391.29	4876.7	3.50517
ID_11903819850111005	LT05_119038_19961211	1474.24	T2	4.39081	1386.88	4949.87	3.56906
ID_11903819850111005	LT05_119038_19970112	1474.24	T2	4.35906	1390.94	4851.14	3.48766
ID_11903819850111005	LT05_119038_19971214	1474.24	T2	4.38954	1390.01	4969.84	3.57539
ID_11903819850111005	LT05_119038_19980131	1474.24	T2	4.15614	1370.56	4801.56	3.50335
ID_11903819850111005	LT05_119038_19981217	1474.24	T2	4.46483	1386.15	5050.71	3.64371
ID_11903819850111005	LT05_119038_19990203	1474.24	T2	4.39869	1389.81	4981.3	3.58415
ID_11903819850111005	LT05_119038_19990219	1474.24	T2	4.41044	1388.95	5014.31	3.61016
ID_11903819850111005	LT05_119038_19991220	1474.24	T2	4.47956	1388.63	5086.35	3.66284
ID_11903819850111005	LT05_119038_20001104	1474.24	T2	4.25477	1346.75	4857.44	3.60679
ID_11903819850111005	LT05_119038_20001206	1474.24	T2	4.41437	1386.21	5009.26	3.61365
ID_11903819850111005	LT05_119038_20001222	1474.24	T2	4.45622	1389.74	5040.65	3.62706
ID_11903819850111005	LT05_119038_20010208	1474.24	T2	4.38749	1388.66	4976.19	3.58345
ID_11903819850111005	LT05_119038_20010312	1474.24	T2	4.34182	1390.17	4949.09	3.56006
ID_11903819850111005	LT05_119038_20020211	1474.24	T2	4.47324	1394.62	5014.24	3.59543
ID_11903819850111005	LT05_119038_20021110	1474.24	T2	4.27387	1369.62	4944.74	3.61029
ID_11903819850111005	LT05_119038_20030113	1474.24	T2	4.45557	1375.59	5101.75	3.70877
ID_11903819850111005	LT05_119038_20031113	1474.24	T2	4.35988	1378.5	4995.52	3.62389
ID_11903819850111005	LT05_119038_20031215	1474.24	T2	4.33967	1371.3	4961.3	3.61795
ID_11903819850111005	LT05_119038_20040304	1474.24	T2	4.46599	1378.73	5092.03	3.69327
ID_11903819850111005	LT05_119038_20041115	1474.24	T2	4.27756	1362.17	4979.77	3.65576
ID_11903819850111005	LT05_119038_20050219	1474.24	T2	4.40754	1393.46	5017.45	3.6007
ID_11903819850111005	LT05_119038_20050307	1474.24	T2	4.45081	1379.02	5097.74	3.69663
ID_11903819850111005	LT05_119038_20050323	1474.24	T2	4.34042	1369.02	5014.26	3.66266
ID_11903819850111005	LT05_119038_20061223	1474.24	T2	4.37826	1391.13	4971.85	3.57397
ID_11903819850111005	LT05_119038_20070108	1474.24	T2	4.41516	1394.73	5020.45	3.59957
ID_11903819850111005	LT05_119038_20070124	1474.24	T2	4.29894	1359.4	4920.12	3.61934
ID_11903819850111005	LT05_119038_20070329	1474.24	T2	4.41108	1387.18	4967.81	3.58124
ID_11903819850111005	LT05_119038_20080212	1474.24	T2	4.29116	1393.54	4928.14	3.53642
ID_11903819850111005	LT05_119038_20080228	1474.24	T2	4.37259	1388.71	4965.57	3.57566
ID_11903819850111005	LT05_119038_20090113	1474.24	T2	4.39681	1389.63	5036.85	3.6246
ID_11903819850111005	LT05_119038_20101202	1474.24	T2	4.52212	1406.88	5152.6	3.66243
ID_11903819850111005	LT05_119038_20101218	1474.24	T2	4.52422	1424.65	5165.91	3.6261
ID_11903819850111005	LT05_119038_20110204	1474.24	T2	4.40848	1463.52	5009.3	3.42277
ID_11903819850111006	LC08_119038_20131210	1539.46	T4	55.5411	6470.09	11971.5	1.85029
ID_11903819850111006	LC08_119038_20140316	1539.46	T4	58.0012	6610.98	12523.6	1.89436
ID_11903819850111006	LC08_119038_20141229	1539.46	T4	55.8244	6403.11	12141.8	1.89623
ID_11903819850111006	LC08_119038_20151216	1539.46	T4	56.3541	6339.86	12514.7	1.97398
ID_11903819850111006	LC08_119038_20160101	1539.46	T4	56.0906	6409.23	12508.8	1.95168
ID_11903819850111006	LC08_119038_20160305	1539.46	T4	56.2838	6317.94	12513.2	1.98059
ID_11903819850111006	LC08_119038_20170308	1539.46	T4	55.7604	6443.12	11933.2	1.85209
ID_11903819850111006	LC08_119038_20171205	1539.46	T4	57.7147	6538.15	12521.5	1.91514
ID_11903819850111006	LC08_119038_20171221	1539.46	T4	57.7879	6532.78	12514.7	1.91567
ID_11903819850111006	LC08_119038_20180223	1539.46	T4	56.4495	6437.86	12518.1	1.94444
ID_11903819850111006	LC08_119038_20180327	1539.46	T4	55.5709	6396.2	11922.3	1.86397
ID_11903819850111006	LE07_119038_19991228	1539.46	T4	41.5564	6140.31	9134.13	1.48757
ID_11903819850111006	LE07_119038_20000301	1539.46	T4	43.7757	6140.44	9862.77	1.6062
ID_11903819850111006	LE07_119038_20000317	1539.46	T4	48.0138	6288.63	10543.6	1.67662
ID_11903819850111006	LE07_119038_20001128	1539.46	T4	44.3976	6185.22	10238.7	1.65535
ID_11903819850111006	LE07_119038_20010115	1539.46	T4	42.0764	6135.6	9786.49	1.59503
ID_11903819850111006	LE07_119038_20010304	1539.46	T4	41.6829	6160.56	9098.76	1.47694
ID_11903819850111006	LE07_119038_20011115	1539.46	T4	47.2157	6313.75	11489.5	1.81976
ID_11903819850111006	LE07_119038_20020102	1539.46	T4	46.7233	6291.28	11126.5	1.76856
ID_11903819850111006	LE07_119038_20020219	1539.46	T4	44.1632	6161.95	10093.6	1.63805
ID_11903819850111006	LE07_119038_20021118	1539.46	T4	46.7049	6393.24	11468	1.79378
ID_11903819850111006	LE07_119038_20030121	1539.46	T4	45.4177	6228.9	10650.4	1.70983
ID_11903819850111006	LE07_119038_20030206	1539.46	T4	44.7785	6206.73	10519.8	1.69491
ID_11903819850111006	LE07_119038_20121129	1539.46	T4	56.8613	6501.19	12522.6	1.92619
ID_11903819850111006	LT05_119038_19850111	1539.46	T4	29.2464	6535.05	8009.56	1.22563
ID_11903819850111006	LT05_119038_19860215	1539.46	T4	29.0476	6382.85	7933.84	1.24299
ID_11903819850111006	LT05_119038_19860303	1539.46	T4	29.0642	6367.06	7874.61	1.23677
ID_11903819850111006	LT05_119038_19870202	1539.46	T4	31.3896	6391.27	7968.62	1.2468
ID_11903819850111006	LT05_119038_19880120	1539.46	T4	37.181	6593.68	11891.1	1.80341
ID_11903819850111006	LT05_119038_19881103	1539.46	T4	34.787	6440.65	10891.3	1.69102
ID_11903819850111006	LT05_119038_19881205	1539.46	T4	44.4711	6687.11	11737.8	1.75529
ID_11903819850111006	LT05_119038_19890327	1539.46	T4	32.482	6289.56	8743.17	1.39011
ID_11903819850111006	LT05_119038_19891208	1539.46	T4	32.3687	6267.82	9988.41	1.5936
ID_11903819850111006	LT05_119038_19900226	1539.46	T4	35.6113	6402.07	10149.2	1.5853
ID_11903819850111006	LT05_119038_19910317	1539.46	T4	34.7473	6280.48	9679.03	1.54113
ID_11903819850111006	LT05_119038_19911112	1539.46	T4	35.8199	6299.01	10076.2	1.59965
ID_11903819850111006	LT05_119038_19911214	1539.46	T4	33.872	6536.5	8439.07	1.29107
ID_11903819850111006	LT05_119038_19920115	1539.46	T4	33.7469	6207.52	9243.05	1.48901
ID_11903819850111006	LT05_119038_19920216	1539.46	T4	45.7698	6494.43	10609	1.63355
ID_11903819850111006	LT05_119038_19921216	1539.46	T4	35.7831	6348.89	9191.42	1.44772
ID_11903819850111006	LT05_119038_19930202	1539.46	T4	38.9694	6263.59	9848.49	1.57234
ID_11903819850111006	LT05_119038_19931101	1539.46	T4	39.0056	6209.93	9742.73	1.5689
ID_11903819850111006	LT05_119038_19931219	1539.46	T4	38.0045	6252.39	9510.88	1.52116
ID_11903819850111006	LT05_119038_19940325	1539.46	T4	45.3357	6302.27	10273.7	1.63016
ID_11903819850111006	LT05_119038_19941206	1539.46	T4	41.3878	6187.59	9698.75	1.56745
ID_11903819850111006	LT05_119038_19941222	1539.46	T4	43.4024	6951.74	9588.88	1.37935
ID_11903819850111006	LT05_119038_19950107	1539.46	T4	39.3196	6244.74	9310.96	1.49101
ID_11903819850111006	LT05_119038_19951209	1539.46	T4	44.5228	6316.63	10138.5	1.60505
ID_11903819850111006	LT05_119038_19960110	1539.46	T4	41.4525	6219.47	9974.77	1.6038
ID_11903819850111006	LT05_119038_19961211	1539.46	T4	44.0181	6320.01	10166.5	1.60862
ID_11903819850111006	LT05_119038_19970112	1539.46	T4	41.8582	6236.91	9888.95	1.58555
ID_11903819850111006	LT05_119038_19971214	1539.46	T4	44.9163	6257.99	10224	1.63375
ID_11903819850111006	LT05_119038_19980131	1539.46	T4	40.6578	6173.58	9597	1.55453
ID_11903819850111006	LT05_119038_19981217	1539.46	T4	49.3944	6398.27	11222.4	1.75398
ID_11903819850111006	LT05_119038_19990203	1539.46	T4	44.9543	6330.29	10329.1	1.63169
ID_11903819850111006	LT05_119038_19990219	1539.46	T4	44.7301	6262.29	10243.2	1.63569
ID_11903819850111006	LT05_119038_19991220	1539.46	T4	43.7714	6385.08	11935.2	1.86923
ID_11903819850111006	LT05_119038_20001104	1539.46	T4	41.3341	6147.87	9102.28	1.48056
ID_11903819850111006	LT05_119038_20001206	1539.46	T4	43.0819	6120.65	9782.44	1.59827
ID_11903819850111006	LT05_119038_20001222	1539.46	T4	50.0548	6366.9	11519	1.8092
ID_11903819850111006	LT05_119038_20010208	1539.46	T4	47.1984	6257.4	10789.8	1.72433
ID_11903819850111006	LT05_119038_20010312	1539.46	T4	44.4961	6186.89	10077.2	1.6288
ID_11903819850111006	LT05_119038_20020211	1539.46	T4	50.6803	6460.71	11797.2	1.826
ID_11903819850111006	LT05_119038_20021110	1539.46	T4	44.172	6151.89	10203.2	1.65855
ID_11903819850111006	LT05_119038_20030113	1539.46	T4	44.939	6167.79	10575.3	1.71459
ID_11903819850111006	LT05_119038_20031113	1539.46	T4	46.1662	6253.09	10830.6	1.73204
ID_11903819850111006	LT05_119038_20031215	1539.46	T4	45.0858	6212.88	10716.8	1.72493
ID_11903819850111006	LT05_119038_20040304	1539.46	T4	51.1437	6413.89	11701.5	1.82439
ID_11903819850111006	LT05_119038_20041115	1539.46	T4	46.6751	6239.1	10810.1	1.73264
ID_11903819850111006	LT05_119038_20050219	1539.46	T4	45.3684	6188.28	10722.3	1.73268
ID_11903819850111006	LT05_119038_20050307	1539.46	T4	49.9893	6366.69	11148.7	1.7511
ID_11903819850111006	LT05_119038_20050323	1539.46	T4	50.7622	6373.06	11398.1	1.78847
ID_11903819850111006	LT05_119038_20061223	1539.46	T4	49.1404	6259.5	11104.7	1.77405
ID_11903819850111006	LT05_119038_20070108	1539.46	T4	49.6754	6267.8	11324	1.8067
ID_11903819850111006	LT05_119038_20070124	1539.46	T4	47.3245	6211.42	10740.9	1.72921
ID_11903819850111006	LT05_119038_20070329	1539.46	T4	46.8571	6181.27	10713.7	1.73326
ID_11903819850111006	LT05_119038_20080212	1539.46	T4	46.6538	6169.18	10719.5	1.73758
ID_11903819850111006	LT05_119038_20080228	1539.46	T4	47.8558	6222.65	10765.7	1.73009
ID_11903819850111006	LT05_119038_20090113	1539.46	T4	50.8703	6466.61	11423.9	1.76661
ID_11903819850111006	LT05_119038_20101202	1539.46	T4	48.2219	6295.64	10696.7	1.69907
ID_11903819850111006	LT05_119038_20101218	1539.46	T4	52.7887	6467.35	11525.4	1.78209
ID_11903819850111006	LT05_119038_20110204	1539.46	T4	51.9451	6484.55	12529	1.93213
ID_11903819850111008	LC08_119038_20131210	1517.14	T3	20.7844	3937.07	8072.94	2.05049
ID_11903819850111008	LC08_119038_20140316	1517.14	T3	22.1975	4011.09	8372.98	2.08746
ID_11903819850111008	LC08_119038_20141229	1517.14	T3	20.3777	3952.18	8037.84	2.03378
ID_11903819850111008	LC08_119038_20151216	1517.14	T3	20.9955	3961.88	8172.62	2.06281
ID_11903819850111008	LC08_119038_20160101	1517.14	T3	20.8196	3952.92	8142.61	2.0599
ID_11903819850111008	LC08_119038_20160305	1517.14	T3	21.2909	3972.22	8178.88	2.05902
ID_11903819850111008	LC08_119038_20170308	1517.14	T3	20.7667	3955.14	8106.5	2.04961
ID_11903819850111008	LC08_119038_20171205	1517.14	T3	22.0799	4009.78	8296.59	2.06909
ID_11903819850111008	LC08_119038_20171221	1517.14	T3	22.1572	4010.08	8297.57	2.06918
ID_11903819850111008	LC08_119038_20180223	1517.14	T3	20.8202	3972.61	8132.32	2.0471
ID_11903819850111008	LC08_119038_20180327	1517.14	T3	20.5421	3941.37	8092.09	2.05311
ID_11903819850111008	LE07_119038_19991228	1517.14	T3	19.9346	3956.43	7845.19	1.9829
ID_11903819850111008	LE07_119038_20000301	1517.14	T3	21.7233	4018.73	8375.41	2.08409
ID_11903819850111008	LE07_119038_20000317	1517.14	T3	22.2248	4034.58	8535.41	2.11557
ID_11903819850111008	LE07_119038_20001128	1517.14	T3	20.5992	3966.48	8099.87	2.04208
ID_11903819850111008	LE07_119038_20010115	1517.14	T3	20.0979	3951.99	7990.89	2.02199
ID_11903819850111008	LE07_119038_20010304	1517.14	T3	19.9081	3954.88	7957.71	2.01212
ID_11903819850111008	LE07_119038_20011115	1517.14	T3	21.5644	3996.06	8348.19	2.08911
ID_11903819850111008	LE07_119038_20020102	1517.14	T3	21.7175	3998.31	8366.88	2.0926
ID_11903819850111008	LE07_119038_20020219	1517.14	T3	20.6711	3954.55	8106.68	2.04997
ID_11903819850111008	LE07_119038_20021118	1517.14	T3	21.7281	3990.02	8330.6	2.08786
ID_11903819850111008	LE07_119038_20030121	1517.14	T3	21.273	3974.93	8219.37	2.0678
ID_11903819850111008	LE07_119038_20030206	1517.14	T3	20.7596	3954.49	8078.16	2.04278
ID_11903819850111008	LE07_119038_20121129	1517.14	T3	21.2706	3974.47	8087.03	2.03474
ID_11903819850111008	LT05_119038_19850111	1517.14	T3	18.5554	3965.08	7451.37	1.87925
ID_11903819850111008	LT05_119038_19860215	1517.14	T3	17.3453	3940.24	7077.86	1.7963
ID_11903819850111008	LT05_119038_19860303	1517.14	T3	17.5258	3952.2	7146.01	1.80811
ID_11903819850111008	LT05_119038_19870202	1517.14	T3	18.5851	3980.71	7572.66	1.90234
ID_11903819850111008	LT05_119038_19880120	1517.14	T3	20.7243	4009.35	7844.69	1.9566
ID_11903819850111008	LT05_119038_19881103	1517.14	T3	20.1979	3981.68	7818.45	1.96361
ID_11903819850111008	LT05_119038_19881205	1517.14	T3	21.87	4054.21	8335.58	2.05603
ID_11903819850111008	LT05_119038_19890327	1517.14	T3	17.7289	3955.91	7281.42	1.84064
ID_11903819850111008	LT05_119038_19891208	1517.14	T3	19.888	3964.41	7775.97	1.96145
ID_11903819850111008	LT05_119038_19900226	1517.14	T3	18.8129	3958.01	7482.44	1.89045
ID_11903819850111008	LT05_119038_19910317	1517.14	T3	18.8749	3946.55	7445.07	1.88647
ID_11903819850111008	LT05_119038_19911112	1517.14	T3	19.3614	3947.91	7583.92	1.921
ID_11903819850111008	LT05_119038_19911214	1517.14	T3	18.2986	3956.06	7342.56	1.85603
ID_11903819850111008	LT05_119038_19920115	1517.14	T3	18.1836	3959.39	7475.08	1.88794
ID_11903819850111008	LT05_119038_19920216	1517.14	T3	21.7389	4047.6	8316.46	2.05467
ID_11903819850111008	LT05_119038_19921216	1517.14	T3	18.4291	3942.2	7505.47	1.90388
ID_11903819850111008	LT05_119038_19930202	1517.14	T3	20.9472	3985.34	8002.41	2.00796
ID_11903819850111008	LT05_119038_19931101	1517.14	T3	19.3956	3956.92	7533.55	1.90389
ID_11903819850111008	LT05_119038_19931219	1517.14	T3	19.0764	3953.51	7457.01	1.88617
ID_11903819850111008	LT05_119038_19940325	1517.14	T3	21.4319	4017.01	7971.32	1.98439
ID_11903819850111008	LT05_119038_19941206	1517.14	T3	19.3881	3953.16	7526.8	1.904
ID_11903819850111008	LT05_119038_19941222	1517.14	T3	19.3362	3954.04	7528.86	1.90409
ID_11903819850111008	LT05_119038_19950107	1517.14	T3	18.8356	3941.89	7437.5	1.88678
ID_11903819850111008	LT05_119038_19951209	1517.14	T3	21.1786	3991.03	8002.22	2.00505
ID_11903819850111008	LT05_119038_19960110	1517.14	T3	20.8585	3981.74	7991.73	2.0071
ID_11903819850111008	LT05_119038_19961211	1517.14	T3	21.2761	3999.14	8250.36	2.06304
ID_11903819850111008	LT05_119038_19970112	1517.14	T3	20.6971	3976.48	8049.28	2.02422
ID_11903819850111008	LT05_119038_19971214	1517.14	T3	21.1873	3994.99	8163.36	2.0434
ID_11903819850111008	LT05_119038_19980131	1517.14	T3	19.0608	3937.67	7559.64	1.91983
ID_11903819850111008	LT05_119038_19981217	1517.14	T3	22.4091	4053.99	8579.85	2.11639
ID_11903819850111008	LT05_119038_19990203	1517.14	T3	21.7451	4021.76	8365.21	2.07999
ID_11903819850111008	LT05_119038_19990219	1517.14	T3	21.7115	4019.01	8410.15	2.09259
ID_11903819850111008	LT05_119038_19991220	1517.14	T3	20.3342	4056.18	8454.87	2.08444
ID_11903819850111008	LT05_119038_20001104	1517.14	T3	19.4277	3943.23	7734.98	1.96158
ID_11903819850111008	LT05_119038_20001206	1517.14	T3	21.353	3987.65	8293.62	2.07983
ID_11903819850111008	LT05_119038_20001222	1517.14	T3	22.4761	4048.9	8602.27	2.1246
ID_11903819850111008	LT05_119038_20010208	1517.14	T3	21.7972	4003.58	8348.96	2.08537
ID_11903819850111008	LT05_119038_20010312	1517.14	T3	20.5977	3965.92	8101.35	2.04274
ID_11903819850111008	LT05_119038_20020211	1517.14	T3	22.3715	4047.15	8545.18	2.1114
ID_11903819850111008	LT05_119038_20021110	1517.14	T3	20.2958	3957.45	7997.98	2.02099
ID_11903819850111008	LT05_119038_20030113	1517.14	T3	21.7515	3997.32	8342.01	2.0869
ID_11903819850111008	LT05_119038_20031113	1517.14	T3	21.5156	3978.82	8213.52	2.06431
ID_11903819850111008	LT05_119038_20031215	1517.14	T3	20.9224	3966.06	8067.54	2.03414
ID_11903819850111008	LT05_119038_20040304	1517.14	T3	22.6578	4048.41	8605.15	2.12556
ID_11903819850111008	LT05_119038_20041115	1517.14	T3	21.2184	3968.66	8173.82	2.05959
ID_11903819850111008	LT05_119038_20050219	1517.14	T3	21.1588	3976.81	8124.23	2.0429
ID_11903819850111008	LT05_119038_20050307	1517.14	T3	22.5652	4035.56	8564.25	2.1222
ID_11903819850111008	LT05_119038_20050323	1517.14	T3	22.3629	4020.48	8501.26	2.11449
ID_11903819850111008	LT05_119038_20061223	1517.14	T3	21.9364	3989.5	8366.99	2.09725
ID_11903819850111008	LT05_119038_20070108	1517.14	T3	22.1833	3999.42	8421.07	2.10557
ID_11903819850111008	LT05_119038_20070124	1517.14	T3	20.9549	3971.2	8108.01	2.0417
ID_11903819850111008	LT05_119038_20070329	1517.14	T3	21.84	3998.15	8351.88	2.08894
ID_11903819850111008	LT05_119038_20080212	1517.14	T3	20.402	3957.65	8036.36	2.03059
ID_11903819850111008	LT05_119038_20080228	1517.14	T3	20.9571	3976.13	8104.47	2.03828
ID_11903819850111008	LT05_119038_20090113	1517.14	T3	22.2564	3996.31	8430.17	2.10949
ID_11903819850111008	LT05_119038_20101202	1517.14	T3	21.9554	3977.99	8369.49	2.10395
ID_11903819850111008	LT05_119038_20101218	1517.14	T3	22.6317	4017.17	8566.5	2.13247
ID_11903819850111008	LT05_119038_20110204	1517.14	T3	22.0099	3995.74	8428.83	2.10946
ID_11903819850111009	LC08_119038_20131210	1466.27	T2	6.99527	1334.86	8289.43	6.20999
ID_11903819850111009	LC08_119038_20140316	1466.27	T2	7.34586	1355.1	8450.5	6.23605
ID_11903819850111009	LC08_119038_20141229	1466.27	T2	6.94029	1337.36	8276.32	6.18854
ID_11903819850111009	LC08_119038_20151216	1466.27	T2	7.43709	1328.25	8986.28	6.76548
ID_11903819850111009	LC08_119038_20160101	1466.27	T2	7.44618	1333.58	9012.26	6.75793
ID_11903819850111009	LC08_119038_20160305	1466.27	T2	7.44618	1333.58	9012.26	6.75793
ID_11903819850111009	LC08_119038_20170308	1466.27	T2	7.92592	1361.04	9159.68	6.72989
ID_11903819850111009	LC08_119038_20171205	1466.27	T2	7.68978	1267.79	9214.9	7.26847
ID_11903819850111009	LC08_119038_20171221	1466.27	T2	7.75239	1271.68	9206.08	7.23933
ID_11903819850111009	LC08_119038_20180223	1466.27	T2	7.54987	1259.16	9153.12	7.26924
ID_11903819850111009	LC08_119038_20180327	1466.27	T2	7.73379	1263.72	9190.45	7.27256
ID_11903819850111009	LE07_119038_19991228	1466.27	T2	6.95036	1308.6	8462.9	6.46713
ID_11903819850111009	LE07_119038_20000301	1466.27	T2	7.93456	1408.99	8832.11	6.26839
ID_11903819850111009	LE07_119038_20000317	1466.27	T2	7.65639	1367.04	8721.92	6.38016
ID_11903819850111009	LE07_119038_20001128	1466.27	T2	6.73824	1287.77	8321.37	6.46186
ID_11903819850111009	LE07_119038_20010115	1466.27	T2	6.75774	1291.22	8357.8	6.4728
ID_11903819850111009	LE07_119038_20010304	1466.27	T2	7.50605	1342.62	8634.66	6.4312
ID_11903819850111009	LE07_119038_20011115	1466.27	T2	7.11233	1318.34	8480.2	6.43248
ID_11903819850111009	LE07_119038_20020102	1466.27	T2	7.43855	1342.88	8602.38	6.40592
ID_11903819850111009	LE07_119038_20020219	1466.27	T2	7.15195	1328.04	8456.68	6.36777
ID_11903819850111009	LE07_119038_20021118	1466.27	T2	7.24388	1373.26	8496.94	6.18742
ID_11903819850111009	LE07_119038_20030121	1466.27	T2	7.16682	1358.99	8436.43	6.20789
ID_11903819850111009	LE07_119038_20030206	1466.27	T2	7.0613	1344.93	8431.83	6.26933
ID_11903819850111009	LE07_119038_20121129	1466.27	T2	6.94799	1306.44	8256.9	6.32014
ID_11903819850111009	LT05_119038_19850111	1466.27	T2	4.55296	1081.42	7632.23	7.05758
ID_11903819850111009	LT05_119038_19860215	1466.27	T2	3.88054	1058.72	5610.49	5.29931
ID_11903819850111009	LT05_119038_19860303	1466.27	T2	5.63216	1129.64	7653.81	6.77545
ID_11903819850111009	LT05_119038_19870202	1466.27	T2	4.35937	1104.91	7590.84	6.87012
ID_11903819850111009	LT05_119038_19880120	1466.27	T2	6.63736	1182.63	9397.49	7.94628
ID_11903819850111009	LT05_119038_19881103	1466.27	T2	6.61887	1181.22	8880.36	7.51795
ID_11903819850111009	LT05_119038_19881205	1466.27	T2	7.6149	1263.77	9374.68	7.41801
ID_11903819850111009	LT05_119038_19890327	1466.27	T2	3.71128	1032.56	5683.51	5.50427
ID_11903819850111009	LT05_119038_19891208	1466.27	T2	7.20703	1290.77	8962.86	6.9438
ID_11903819850111009	LT05_119038_19900226	1466.27	T2	3.99387	1040.7	7316.33	7.03017
ID_11903819850111009	LT05_119038_19910317	1466.27	T2	4.11409	1042.9	7316.8	7.01583
ID_11903819850111009	LT05_119038_19911112	1466.27	T2	5.17692	1120.55	7595.09	6.77798
ID_11903819850111009	LT05_119038_19911214	1466.27	T2	6.48955	1156.95	8679	7.50162
ID_11903819850111009	LT05_119038_19920115	1466.27	T2	6.42281	1294.31	9842.88	7.60471
ID_11903819850111009	LT05_119038_19920216	1466.27	T2	8.04307	1303.39	9553.87	7.33001
ID_11903819850111009	LT05_119038_19921216	1466.27	T2	6.46647	1141.26	8655.24	7.58397
ID_11903819850111009	LT05_119038_19930202	1466.27	T2	8.79249	1335.28	10334.9	7.73985
ID_11903819850111009	LT05_119038_19931101	1466.27	T2	4.67483	1062.59	8181.69	7.69973
ID_11903819850111009	LT05_119038_19931219	1466.27	T2	5.94346	1129.18	8432.31	7.46761
ID_11903819850111009	LT05_119038_19940325	1466.27	T2	7.67392	1203.53	9693.57	8.05428
ID_11903819850111009	LT05_119038_19941206	1466.27	T2	5.71052	1118.9	8466.13	7.56651
ID_11903819850111009	LT05_119038_19941222	1466.27	T2	5.70606	1097.52	8452.22	7.70118
ID_11903819850111009	LT05_119038_19950107	1466.27	T2	5.7742	1110.18	8470.46	7.62984
ID_11903819850111009	LT05_119038_19951209	1466.27	T2	7.82625	1217.1	9915.58	8.1469
ID_11903819850111009	LT05_119038_19960110	1466.27	T2	5.92153	1146.96	9455.59	8.24406
ID_11903819850111009	LT05_119038_19961211	1466.27	T2	7.62487	1284.75	9577.04	7.45437
ID_11903819850111009	LT05_119038_19970112	1466.27	T2	6.87509	1163.73	9346.74	8.03173
ID_11903819850111009	LT05_119038_19971214	1466.27	T2	7.22142	1214.24	9249.26	7.61729
ID_11903819850111009	LT05_119038_19980131	1466.27	T2	4.8664	1047.78	8020.84	7.65512
ID_11903819850111009	LT05_119038_19981217	1466.27	T2	7.95876	1444.46	8818.17	6.10481
ID_11903819850111009	LT05_119038_19990203	1466.27	T2	7.59896	1399.21	8709.55	6.22464
ID_11903819850111009	LT05_119038_19990219	1466.27	T2	7.51326	1390.31	8698.9	6.2568
ID_11903819850111009	LT05_119038_19991220	1466.27	T2	7.44467	1397.37	8818.4	6.31069
ID_11903819850111009	LT05_119038_20001104	1466.27	T2	6.45312	1239.33	8199.6	6.61616
ID_11903819850111009	LT05_119038_20001206	1466.27	T2	7.63067	1362.36	8697.44	6.38411
ID_11903819850111009	LT05_119038_20001222	1466.27	T2	7.86301	1385.6	8730.97	6.30124
ID_11903819850111009	LT05_119038_20010208	1466.27	T2	7.38491	1333.14	8614.77	6.46201
ID_11903819850111009	LT05_119038_20010312	1466.27	T2	6.91724	1297.23	8332.2	6.42309
ID_11903819850111009	LT05_119038_20020211	1466.27	T2	7.98421	1415.16	8719.38	6.16141
ID_11903819850111009	LT05_119038_20021110	1466.27	T2	6.82911	1305.89	8390.6	6.42519
ID_11903819850111009	LT05_119038_20030113	1466.27	T2	7.79376	1427.29	8554.08	5.99323
ID_11903819850111009	LT05_119038_20031113	1466.27	T2	7.15257	1394.23	8400.48	6.02519
ID_11903819850111009	LT05_119038_20031215	1466.27	T2	7.18734	1395.88	8418.6	6.03102
ID_11903819850111009	LT05_119038_20040304	1466.27	T2	7.69783	1440.57	8552.03	5.93656
ID_11903819850111009	LT05_119038_20041115	1466.27	T2	6.98911	1379.12	8376.18	6.07358
ID_11903819850111009	LT05_119038_20050219	1466.27	T2	7.40207	1416.18	8478.51	5.98688
ID_11903819850111009	LT05_119038_20050307	1466.27	T2	7.5843	1422.52	8476.2	5.95857
ID_11903819850111009	LT05_119038_20050323	1466.27	T2	7.30324	1396.32	8480.39	6.07338
ID_11903819850111009	LT05_119038_20061223	1466.27	T2	7.27718	1358.92	8366.92	6.15705
ID_11903819850111009	LT05_119038_20070108	1466.27	T2	7.42788	1388.82	8428.76	6.069
ID_11903819850111009	LT05_119038_20070124	1466.27	T2	7.10734	1353.64	8294.42	6.1275
ID_11903819850111009	LT05_119038_20070329	1466.27	T2	7.41951	1387.7	8416.53	6.06511
ID_11903819850111009	LT05_119038_20080212	1466.27	T2	6.84592	1329.68	8233.08	6.19177
ID_11903819850111009	LT05_119038_20080228	1466.27	T2	7.17125	1371.5	8338.3	6.07969
ID_11903819850111009	LT05_119038_20090113	1466.27	T2	7.27007	1375.87	8456.62	6.14639
ID_11903819850111009	LT05_119038_20101202	1466.27	T2	7.74053	1396.91	8688.59	6.21988
ID_11903819850111009	LT05_119038_20101218	1466.27	T2	7.80046	1393.24	8701.48	6.2455
ID_11903819850111009	LT05_119038_20110204	1466.27	T2	7.24676	1351.6	8421.73	6.23094
ID_11903819850111010	LC08_119038_20131210	1532.28	T3	10.7264	2373.22	6436.48	2.71213
ID_11903819850111010	LC08_119038_20140316	1532.28	T3	15.2955	2533.58	10957.9	4.32505
ID_11903819850111010	LC08_119038_20141229	1532.28	T3	10.7646	2352.16	6488.47	2.75852
ID_11903819850111010	LC08_119038_20151216	1532.28	T3	11.4471	2382.85	10692.5	4.48725
ID_11903819850111010	LC08_119038_20160101	1532.28	T3	11.0197	2346.25	7189.61	3.0643
ID_11903819850111010	LC08_119038_20160305	1532.28	T3	11.8453	2372.58	10733.9	4.52414
ID_11903819850111010	LC08_119038_20170308	1532.28	T3	11.7891	2363.6	7097.01	3.00262
ID_11903819850111010	LC08_119038_20171205	1532.28	T3	15.7441	2540.27	11027.4	4.34105
ID_11903819850111010	LC08_119038_20171221	1532.28	T3	16.1681	2558.17	11055.7	4.32173
ID_11903819850111010	LC08_119038_20180223	1532.28	T3	12.2514	2403.49	10681	4.44395
ID_11903819850111010	LC08_119038_20180327	1532.28	T3	11.8684	2384.23	7106	2.98041
ID_11903819850111010	LE07_119038_19991228	1532.28	T3	11.0552	2333.18	6471.6	2.77373
ID_11903819850111010	LE07_119038_20000301	1532.28	T3	11.3629	2408.81	6536.44	2.71355
ID_11903819850111010	LE07_119038_20000317	1532.28	T3	11.6422	2461.98	6806.24	2.76454
ID_11903819850111010	LE07_119038_20001128	1532.28	T3	11.1932	2391.22	6551.53	2.73982
ID_11903819850111010	LE07_119038_20010115	1532.28	T3	10.9541	2383.98	6403.98	2.68625
ID_11903819850111010	LE07_119038_20010304	1532.28	T3	10.9104	2322.32	6304.54	2.71476
ID_11903819850111010	LE07_119038_20011115	1532.28	T3	11.4162	2434.4	6635.52	2.72573
ID_11903819850111010	LE07_119038_20020102	1532.28	T3	11.3813	2443.43	6629.21	2.71308
ID_11903819850111010	LE07_119038_20020219	1532.28	T3	11.1271	2395.21	6466.27	2.69966
ID_11903819850111010	LE07_119038_20021118	1532.28	T3	11.531	2570.87	10648.8	4.14209
ID_11903819850111010	LE07_119038_20030121	1532.28	T3	11.288	2399.14	6618.89	2.75885
ID_11903819850111010	LE07_119038_20030206	1532.28	T3	11.1341	2397.93	6510.4	2.71501
ID_11903819850111010	LE07_119038_20121129	1532.28	T3	11.4493	2407.61	10807	4.48867
ID_11903819850111010	LT05_119038_19850111	1532.28	T3	11.2255	2703.06	5862.72	2.16892
ID_11903819850111010	LT05_119038_19860215	1532.28	T3	10.6965	2648.9	5649.95	2.13294
ID_11903819850111010	LT05_119038_19860303	1532.28	T3	10.6402	2653.68	5636.22	2.12393
ID_11903819850111010	LT05_119038_19870202	1532.28	T3	10.9645	2690.73	5704.44	2.12004
ID_11903819850111010	LT05_119038_19880120	1532.28	T3	11.2014	2549.4	6002.53	2.35449
ID_11903819850111010	LT05_119038_19881103	1532.28	T3	10.8164	2503.69	5780.56	2.30882
ID_11903819850111010	LT05_119038_19881205	1532.28	T3	13.2955	2501.93	8848.45	3.53665
ID_11903819850111010	LT05_119038_19890327	1532.28	T3	10.5561	2525.1	5659.45	2.24128
ID_11903819850111010	LT05_119038_19891208	1532.28	T3	10.5957	2466.23	5674.27	2.30078
ID_11903819850111010	LT05_119038_19900226	1532.28	T3	10.8581	2453.89	6135.24	2.50021
ID_11903819850111010	LT05_119038_19910317	1532.28	T3	10.8976	2428.24	6167.37	2.53985
ID_11903819850111010	LT05_119038_19911112	1532.28	T3	10.9526	2388.18	6139.48	2.57078
ID_11903819850111010	LT05_119038_19911214	1532.28	T3	10.5812	2388.11	5844.29	2.44724
ID_11903819850111010	LT05_119038_19920115	1532.28	T3	10.7512	2390.26	6079.48	2.54344
ID_11903819850111010	LT05_119038_19920216	1532.28	T3	13.0314	2488.37	8086.61	3.24976
ID_11903819850111010	LT05_119038_19921216	1532.28	T3	10.5997	2367.98	5912.22	2.49674
ID_11903819850111010	LT05_119038_19930202	1532.28	T3	12.019	2363.43	7307.82	3.09203
ID_11903819850111010	LT05_119038_19931101	1532.28	T3	11.125	2367.79	6752.4	2.85177
ID_11903819850111010	LT05_119038_19931219	1532.28	T3	10.9281	2339.61	7012.57	2.99732
ID_11903819850111010	LT05_119038_19940325	1532.28	T3	14.0458	2452.04	9440	3.84985
ID_11903819850111010	LT05_119038_19941206	1532.28	T3	12.0646	2362.28	7729.01	3.27184
ID_11903819850111010	LT05_119038_19941222	1532.28	T3	12.3754	2455.42	9509.06	3.87269
ID_11903819850111010	LT05_119038_19950107	1532.28	T3	10.8598	2323.17	7045.92	3.03289
ID_11903819850111010	LT05_119038_19951209	1532.28	T3	14.3388	2443.66	8831.98	3.61424
ID_11903819850111010	LT05_119038_19960110	1532.28	T3	13.0846	2416.84	8750.01	3.62043
ID_11903819850111010	LT05_119038_19961211	1532.28	T3	13.3231	2444.81	7943.16	3.24899
ID_11903819850111010	LT05_119038_19970112	1532.28	T3	12.8091	2354.82	7594.96	3.22529
ID_11903819850111010	LT05_119038_19971214	1532.28	T3	13.434	2415.65	7984.61	3.30536
ID_11903819850111010	LT05_119038_19980131	1532.28	T3	12.0179	2316.08	7269.66	3.13878
ID_11903819850111010	LT05_119038_19981217	1532.28	T3	13.2057	2547.18	7809.55	3.06596
ID_11903819850111010	LT05_119038_19990203	1532.28	T3	12.7923	2492.07	7598.49	3.04907
ID_11903819850111010	LT05_119038_19990219	1532.28	T3	12.7175	2479.58	7531.8	3.03752
ID_11903819850111010	LT05_119038_19991220	1532.28	T3	11.6102	2552.4	6882.25	2.69638
ID_11903819850111010	LT05_119038_20001104	1532.28	T3	10.7512	2304.36	6302.04	2.73484
ID_11903819850111010	LT05_119038_20001206	1532.28	T3	11.1578	2392.48	6466.57	2.70287
ID_11903819850111010	LT05_119038_20001222	1532.28	T3	11.7739	2487.06	6854.23	2.75596
ID_11903819850111010	LT05_119038_20010208	1532.28	T3	11.4576	2449.72	6672.91	2.72395
ID_11903819850111010	LT05_119038_20010312	1532.28	T3	11.1972	2398.71	6485.8	2.70387
ID_11903819850111010	LT05_119038_20020211	1532.28	T3	11.7228	2518.14	6767.77	2.6876
ID_11903819850111010	LT05_119038_20021110	1532.28	T3	10.925	2386.37	6449.08	2.70246
ID_11903819850111010	LT05_119038_20030113	1532.28	T3	11.2092	2408.84	6511.19	2.70304
ID_11903819850111010	LT05_119038_20031113	1532.28	T3	11.6033	2433.9	9826.81	4.03747
ID_11903819850111010	LT05_119038_20031215	1532.28	T3	11.1334	2385.68	6512.03	2.72963
ID_11903819850111010	LT05_119038_20040304	1532.28	T3	14.14	2741.19	10506.9	3.83297
ID_11903819850111010	LT05_119038_20041115	1532.28	T3	11.3431	2417.76	7485.63	3.0961
ID_11903819850111010	LT05_119038_20050219	1532.28	T3	11.1052	2394.41	6448.65	2.69321
ID_11903819850111010	LT05_119038_20050307	1532.28	T3	13.0968	2624.38	10333	3.93731
ID_11903819850111010	LT05_119038_20050323	1532.28	T3	12.4796	2525.3	10245.5	4.05714
ID_11903819850111010	LT05_119038_20061223	1532.28	T3	11.9697	2437.38	7660.92	3.14309
ID_11903819850111010	LT05_119038_20070108	1532.28	T3	12.5805	2507.89	10124.6	4.03708
ID_11903819850111010	LT05_119038_20070124	1532.28	T3	11.0563	2389.62	6552.39	2.74202
ID_11903819850111010	LT05_119038_20070329	1532.28	T3	11.2596	2387.4	7283.06	3.05063
ID_11903819850111010	LT05_119038_20080212	1532.28	T3	10.8899	2367.74	6454.84	2.72616
ID_11903819850111010	LT05_119038_20080228	1532.28	T3	11.0912	2392.47	6526.7	2.72801
ID_11903819850111010	LT05_119038_20090113	1532.28	T3	13.03	2694.7	10093.7	3.74574
ID_11903819850111010	LT05_119038_20101202	1532.28	T3	11.7491	2394.03	10696.5	4.46798
ID_11903819850111010	LT05_119038_20101218	1532.28	T3	16.5419	2606.04	10977.8	4.21242
ID_11903819850111010	LT05_119038_20110204	1532.28	T3	12.8383	2459.88	10884	4.4246
ID_11903819850111013	LC08_119038_20131210	1467.98	T3	19.3934	3671.48	7559.87	2.05908
ID_11903819850111013	LC08_119038_20140316	1467.98	T3	19.5384	3723.71	7608.01	2.04313
ID_11903819850111013	LC08_119038_20141229	1467.98	T3	19.358	3685.42	7695.52	2.0881
ID_11903819850111013	LC08_119038_20151216	1467.98	T3	19.3275	3735.05	7497.32	2.00729
ID_11903819850111013	LC08_119038_20160101	1467.98	T3	19.3325	3739.08	7485.61	2.00199
ID_11903819850111013	LC08_119038_20160305	1467.98	T3	19.3325	3739.08	7485.61	2.00199
ID_11903819850111013	LC08_119038_20170308	1467.98	T3	19.6307	3762.5	7618.92	2.02496
ID_11903819850111013	LC08_119038_20171205	1467.98	T3	19.5175	3802.76	7506.03	1.97384
ID_11903819850111013	LC08_119038_20171221	1467.98	T3	19.5437	3725.54	7615.84	2.04423
ID_11903819850111013	LC08_119038_20180223	1467.98	T3	19.4696	3830.12	7433.66	1.94084
ID_11903819850111013	LC08_119038_20180327	1467.98	T3	19.552	3718.01	7596.32	2.04311
ID_11903819850111013	LE07_119038_19991228	1467.98	T3	19.3564	3593.03	7662.41	2.13258
ID_11903819850111013	LE07_119038_20000301	1467.98	T3	19.5861	3620.35	7886.27	2.17832
ID_11903819850111013	LE07_119038_20000317	1467.98	T3	19.4894	3603.05	7813.92	2.16869
ID_11903819850111013	LE07_119038_20001128	1467.98	T3	19.3077	3582.02	7673.41	2.1422
ID_11903819850111013	LE07_119038_20010115	1467.98	T3	19.3128	3587.52	7666.45	2.13698
ID_11903819850111013	LE07_119038_20010304	1467.98	T3	19.4753	3601.42	7728.84	2.14605
ID_11903819850111013	LE07_119038_20011115	1467.98	T3	19.3346	3588.01	7695.33	2.14473
ID_11903819850111013	LE07_119038_20020102	1467.98	T3	19.43	3601.41	7766.61	2.15655
ID_11903819850111013	LE07_119038_20020219	1467.98	T3	19.397	3592.73	7695.93	2.14208
ID_11903819850111013	LE07_119038_20021118	1467.98	T3	19.3743	3594.2	7698.11	2.14181
ID_11903819850111013	LE07_119038_20030121	1467.98	T3	19.3877	3595.79	7698.04	2.14085
ID_11903819850111013	LE07_119038_20030206	1467.98	T3	19.3762	3590.31	7683.28	2.14001
ID_11903819850111013	LE07_119038_20121129	1467.98	T3	19.1235	3675.31	7413.89	2.01721
ID_11903819850111013	LT05_119038_19850111	1467.98	T3	19.5194	3618.57	7792.47	2.15346
ID_11903819850111013	LT05_119038_19860215	1467.98	T3	19.314	3598.48	7625.1	2.11898
ID_11903819850111013	LT05_119038_19860303	1467.98	T3	19.5647	3619.86	7760.3	2.14381
ID_11903819850111013	LT05_119038_19870202	1467.98	T3	19.5277	3599	7830.06	2.17562
ID_11903819850111013	LT05_119038_19880120	1467.98	T3	19.7294	3616.63	7933.03	2.19349
ID_11903819850111013	LT05_119038_19881103	1467.98	T3	19.6796	3625.71	7881.25	2.17371
ID_11903819850111013	LT05_119038_19881205	1467.98	T3	19.9155	3649.37	7937.1	2.17492
ID_11903819850111013	LT05_119038_19890327	1467.98	T3	19.2207	3600.71	7653.28	2.1255
ID_11903819850111013	LT05_119038_19891208	1467.98	T3	19.7877	3633.85	7883.17	2.16937
ID_11903819850111013	LT05_119038_19900226	1467.98	T3	19.3374	3592.08	7720.53	2.14932
ID_11903819850111013	LT05_119038_19910317	1467.98	T3	19.3776	3601.65	7664.26	2.12798
ID_11903819850111013	LT05_119038_19911112	1467.98	T3	19.5305	3605.6	7785.9	2.15939
ID_11903819850111013	LT05_119038_19911214	1467.98	T3	19.6231	3619.63	7783.44	2.15034
ID_11903819850111013	LT05_119038_19920115	1467.98	T3	19.7292	3636.58	7865.48	2.16288
ID_11903819850111013	LT05_119038_19920216	1467.98	T3	19.802	3640.38	7883.78	2.16565
ID_11903819850111013	LT05_119038_19921216	1467.98	T3	19.5244	3611.25	7730.87	2.14078
ID_11903819850111013	LT05_119038_19930202	1467.98	T3	19.8238	3648.55	7884.62	2.16103
ID_11903819850111013	LT05_119038_19931101	1467.98	T3	19.3899	3598.22	7657.69	2.12819
ID_11903819850111013	LT05_119038_19931219	1467.98	T3	19.5099	3603.37	7685.14	2.13276
ID_11903819850111013	LT05_119038_19940325	1467.98	T3	19.7066	3627.75	7856.74	2.16573
ID_11903819850111013	LT05_119038_19941206	1467.98	T3	19.4728	3605.05	7660.08	2.12482
ID_11903819850111013	LT05_119038_19941222	1467.98	T3	19.4695	3607.85	7658.97	2.12286
ID_11903819850111013	LT05_119038_19950107	1467.98	T3	19.4658	3618.14	7678.13	2.12212
ID_11903819850111013	LT05_119038_19951209	1467.98	T3	19.6099	3625.61	7783.47	2.1468
ID_11903819850111013	LT05_119038_19960110	1467.98	T3	19.5136	3619.79	7714.86	2.1313
ID_11903819850111013	LT05_119038_19961211	1467.98	T3	19.5662	3618.42	7744.35	2.14025
ID_11903819850111013	LT05_119038_19970112	1467.98	T3	19.4497	3604.39	7709.37	2.13888
ID_11903819850111013	LT05_119038_19971214	1467.98	T3	19.4983	3608.2	7730.54	2.14249
ID_11903819850111013	LT05_119038_19980131	1467.98	T3	19.2597	3590.69	7656.47	2.13231
ID_11903819850111013	LT05_119038_19981217	1467.98	T3	19.6157	3621.25	7830.46	2.16236
ID_11903819850111013	LT05_119038_19990203	1467.98	T3	19.5326	3614.96	7806.03	2.15937
ID_11903819850111013	LT05_119038_19990219	1467.98	T3	19.5002	3598.62	7759.89	2.15635
ID_11903819850111013	LT05_119038_19991220	1467.98	T3	19.5818	3616.96	7962.93	2.20156
ID_11903819850111013	LT05_119038_20001104	1467.98	T3	19.2406	3577.5	7653.71	2.1394
ID_11903819850111013	LT05_119038_20001206	1467.98	T3	19.4962	3613.21	7818.66	2.16391
ID_11903819850111013	LT05_119038_20001222	1467.98	T3	19.5283	3604.7	7818.62	2.16901
ID_11903819850111013	LT05_119038_20010208	1467.98	T3	19.4334	3591.87	7718.23	2.14881
ID_11903819850111013	LT05_119038_20010312	1467.98	T3	19.377	3589.18	7662.33	2.13484
ID_11903819850111013	LT05_119038_20020211	1467.98	T3	19.6628	3636.45	7877.13	2.16616
ID_11903819850111013	LT05_119038_20021110	1467.98	T3	19.2851	3593.14	7651.33	2.12942
ID_11903819850111013	LT05_119038_20030113	1467.98	T3	19.5282	3611.55	7808.26	2.16202
ID_11903819850111013	LT05_119038_20031113	1467.98	T3	19.3996	3602.05	7695.49	2.13642
ID_11903819850111013	LT05_119038_20031215	1467.98	T3	19.3861	3594.99	7729	2.14994
ID_11903819850111013	LT05_119038_20040304	1467.98	T3	19.569	3617.77	7845.32	2.16855
ID_11903819850111013	LT05_119038_20041115	1467.98	T3	19.3534	3627.27	7732.76	2.13184
ID_11903819850111013	LT05_119038_20050219	1467.98	T3	19.483	3610	7792.36	2.15855
ID_11903819850111013	LT05_119038_20050307	1467.98	T3	19.5468	3616.94	7842.35	2.16823
ID_11903819850111013	LT05_119038_20050323	1467.98	T3	19.4117	3601.26	7774.22	2.15875
ID_11903819850111013	LT05_119038_20061223	1467.98	T3	19.4288	3605.71	7753.32	2.15029
ID_11903819850111013	LT05_119038_20070108	1467.98	T3	19.4782	3613.66	7748.83	2.14432
ID_11903819850111013	LT05_119038_20070124	1467.98	T3	19.348	3592.37	7698.53	2.14303
ID_11903819850111013	LT05_119038_20070329	1467.98	T3	19.4737	3606.36	7792.51	2.16077
ID_11903819850111013	LT05_119038_20080212	1467.98	T3	19.3253	3585.36	7711.47	2.15082
ID_11903819850111013	LT05_119038_20080228	1467.98	T3	19.4184	3602.33	7730.15	2.14588
ID_11903819850111013	LT05_119038_20090113	1467.98	T3	19.4991	3662.55	7681.35	2.09727
ID_11903819850111013	LT05_119038_20101202	1467.98	T3	19.6387	3635.89	7844.54	2.15753
ID_11903819850111013	LT05_119038_20101218	1467.98	T3	19.6521	3677.78	7782.29	2.11603
ID_11903819850111013	LT05_119038_20110204	1467.98	T3	19.5238	3768.98	7552.1	2.00375
ID_11903819850111016	LC08_119038_20131210	1447.51	T4	224.314	12706	31699.6	2.49484
ID_11903819850111016	LC08_119038_20140316	1447.51	T4	224.755	12706.5	31709.8	2.49556
ID_11903819850111016	LC08_119038_20141229	1447.51	T4	224.134	12692	31696.2	2.49733
ID_11903819850111016	LC08_119038_20151216	1447.51	T4	223.375	12684.8	31681.9	2.49763
ID_11903819850111016	LC08_119038_20160101	1447.51	T4	223.48	12688	31701.1	2.49851
ID_11903819850111016	LC08_119038_20160305	1447.51	T4	225.467	12715.9	31721.8	2.49465
ID_11903819850111016	LC08_119038_20170308	1447.51	T4	225.835	12716.6	31743.5	2.49622
ID_11903819850111016	LC08_119038_20171205	1447.51	T4	224.774	12686.8	31712.4	2.49964
ID_11903819850111016	LC08_119038_20171221	1447.51	T4	225.083	12689.8	31720.3	2.49967
ID_11903819850111016	LC08_119038_20180223	1447.51	T4	224.44	12685.4	31692.2	2.49831
ID_11903819850111016	LC08_119038_20180327	1447.51	T4	225.264	12708.3	31730.9	2.49687
ID_11903819850111016	LE07_119038_19991228	1447.51	T4	222.334	12758.9	31767.1	2.48981
ID_11903819850111016	LE07_119038_20000301	1447.51	T4	225.161	12851.7	31808.3	2.47502
ID_11903819850111016	LE07_119038_20000317	1447.51	T4	223.494	12766.2	31791.4	2.49029
ID_11903819850111016	LE07_119038_20001128	1447.51	T4	221.171	12704.6	31751.9	2.49925
ID_11903819850111016	LE07_119038_20010115	1447.51	T4	221.588	12754.3	31765.3	2.49056
ID_11903819850111016	LE07_119038_20010304	1447.51	T4	224.381	12815.5	31772.8	2.47924
ID_11903819850111016	LE07_119038_20011115	1447.51	T4	221.962	12720.8	31748.1	2.49576
ID_11903819850111016	LE07_119038_20020102	1447.51	T4	222.84	12758.5	31768.9	2.49002
ID_11903819850111016	LE07_119038_20020219	1447.51	T4	222.837	12764.7	31772.8	2.48911
ID_11903819850111016	LE07_119038_20021118	1447.51	T4	222.814	12742.7	31767.3	2.49298
ID_11903819850111016	LE07_119038_20030121	1447.51	T4	222.766	12741.5	31760.4	2.49267
ID_11903819850111016	LE07_119038_20030206	1447.51	T4	222.415	12754.9	31762.5	2.49022
ID_11903819850111016	LE07_119038_20121129	1447.51	T4	224.713	12693.1	31732.3	2.49996
ID_11903819850111016	LT05_119038_19850111	1447.51	T4	221.087	12835.2	31875.5	2.48344
ID_11903819850111016	LT05_119038_19860215	1447.51	T4	221.192	12847.3	31812.3	2.47619
ID_11903819850111016	LT05_119038_19860303	1447.51	T4	222.062	12918.2	31862.5	2.46647
ID_11903819850111016	LT05_119038_19870202	1447.51	T4	221.457	12849.3	31868.9	2.4802
ID_11903819850111016	LT05_119038_19880120	1447.51	T4	222.256	12881.8	31877.7	2.47464
ID_11903819850111016	LT05_119038_19881103	1447.51	T4	221.744	12835	31853.2	2.48176
ID_11903819850111016	LT05_119038_19881205	1447.51	T4	223.456	12951.8	31916.3	2.46424
ID_11903819850111016	LT05_119038_19890327	1447.51	T4	220.317	12758	31811	2.49343
ID_11903819850111016	LT05_119038_19891208	1447.51	T4	222.599	12899.6	31871.8	2.47076
ID_11903819850111016	LT05_119038_19900226	1447.51	T4	220.138	12745	31826.2	2.49714
ID_11903819850111016	LT05_119038_19910317	1447.51	T4	220.284	12751	31799.7	2.4939
ID_11903819850111016	LT05_119038_19911112	1447.51	T4	221.043	12829.8	31823.4	2.48043
ID_11903819850111016	LT05_119038_19911214	1447.51	T4	222.276	12901.7	31828.9	2.46703
ID_11903819850111016	LT05_119038_19920115	1447.51	T4	222.844	12943.8	31900.6	2.46454
ID_11903819850111016	LT05_119038_19920216	1447.51	T4	223.009	12917.6	31869.5	2.46713
ID_11903819850111016	LT05_119038_19921216	1447.51	T4	221.851	12888.3	31838	2.47031
ID_11903819850111016	LT05_119038_19930202	1447.51	T4	224.306	12968.5	31898.1	2.45966
ID_11903819850111016	LT05_119038_19931101	1447.51	T4	220.238	12758.4	31788.7	2.49159
ID_11903819850111016	LT05_119038_19931219	1447.51	T4	221.336	12855.6	31816.8	2.47494
ID_11903819850111016	LT05_119038_19940325	1447.51	T4	222.263	12864.4	31847.5	2.47563
ID_11903819850111016	LT05_119038_19941206	1447.51	T4	220.506	12778.4	31777.8	2.48683
ID_11903819850111016	LT05_119038_19941222	1447.51	T4	221.03	12799.2	31836.7	2.48739
ID_11903819850111016	LT05_119038_19950107	1447.51	T4	221.343	12836.9	31803.6	2.47751
ID_11903819850111016	LT05_119038_19951209	1447.51	T4	222.072	12825.7	31835.1	2.48214
ID_11903819850111016	LT05_119038_19960110	1447.51	T4	221.609	12894	31818.4	2.46768
ID_11903819850111016	LT05_119038_19961211	1447.51	T4	222.306	12797.2	31790.5	2.48417
ID_11903819850111016	LT05_119038_19970112	1447.51	T4	221.207	12775.1	31785.7	2.48811
ID_11903819850111016	LT05_119038_19971214	1447.51	T4	221.585	12761.7	31798	2.49167
ID_11903819850111016	LT05_119038_19980131	1447.51	T4	219.65	12724	31783.6	2.49792
ID_11903819850111016	LT05_119038_19981217	1447.51	T4	224.587	12850.5	31840.4	2.47777
ID_11903819850111016	LT05_119038_19990203	1447.51	T4	222.856	12793.5	31762.6	2.48272
ID_11903819850111016	LT05_119038_19990219	1447.51	T4	222.72	12806.8	31775	2.48111
ID_11903819850111016	LT05_119038_19991220	1447.51	T4	223.314	12849	31803.8	2.47521
ID_11903819850111016	LT05_119038_20001104	1447.51	T4	220.63	12709	31757.4	2.49881
ID_11903819850111016	LT05_119038_20001206	1447.51	T4	223.759	12776.7	31797.4	2.4887
ID_11903819850111016	LT05_119038_20001222	1447.51	T4	224.413	12816.2	31767.9	2.47873
ID_11903819850111016	LT05_119038_20010208	1447.51	T4	222.473	12763.5	31760.8	2.48841
ID_11903819850111016	LT05_119038_20010312	1447.51	T4	221.784	12714.1	31768.9	2.49872
ID_11903819850111016	LT05_119038_20020211	1447.51	T4	225.412	12836.5	31809.1	2.47803
ID_11903819850111016	LT05_119038_20021110	1447.51	T4	221.87	12700.6	31752	2.50003
ID_11903819850111016	LT05_119038_20030113	1447.51	T4	225.477	12879.7	31798	2.46884
ID_11903819850111016	LT05_119038_20031113	1447.51	T4	223.23	12798.5	31768.7	2.48222
ID_11903819850111016	LT05_119038_20031215	1447.51	T4	223.861	12836	31767.1	2.47485
ID_11903819850111016	LT05_119038_20040304	1447.51	T4	225.567	12861.7	31776.3	2.47062
ID_11903819850111016	LT05_119038_20041115	1447.51	T4	222.404	12765.8	31736.9	2.4861
ID_11903819850111016	LT05_119038_20050219	1447.51	T4	224.156	12836.5	31768.2	2.47483
ID_11903819850111016	LT05_119038_20050307	1447.51	T4	225.08	12836.1	31789.5	2.47658
ID_11903819850111016	LT05_119038_20050323	1447.51	T4	223.889	12804.3	31725.3	2.4777
ID_11903819850111016	LT05_119038_20061223	1447.51	T4	223.928	12788.2	31757	2.48331
ID_11903819850111016	LT05_119038_20070108	1447.51	T4	224.089	12815.8	31795.3	2.48094
ID_11903819850111016	LT05_119038_20070124	1447.51	T4	223.128	12774.2	31717.5	2.48294
ID_11903819850111016	LT05_119038_20070329	1447.51	T4	224.647	12815.7	31755.5	2.47785
ID_11903819850111016	LT05_119038_20080212	1447.51	T4	222.961	12753	31718.1	2.48711
ID_11903819850111016	LT05_119038_20080228	1447.51	T4	224.227	12790.1	31723.5	2.48031
ID_11903819850111016	LT05_119038_20090113	1447.51	T4	224.05	12789.4	31776.4	2.48459
ID_11903819850111016	LT05_119038_20101202	1447.51	T4	225.693	12769	31756.7	2.48702
ID_11903819850111016	LT05_119038_20101218	1447.51	T4	225.85	12782.7	31790.5	2.48698
ID_11903819850111016	LT05_119038_20110204	1447.51	T4	224.52	12701.2	31738.7	2.49887
ID_11903819850111017	LC08_119038_20131210	1448.13	T1	2.01284	1364.14	2232.97	1.63691
ID_11903819850111017	LC08_119038_20140316	1448.13	T1	2.02771	1379.22	2243.26	1.62647
ID_11903819850111017	LC08_119038_20141229	1448.13	T1	1.99928	1362.65	2229	1.63578
ID_11903819850111017	LC08_119038_20151216	1448.13	T1	1.93058	1334.4	2220.3	1.6639
ID_11903819850111017	LC08_119038_20160101	1448.13	T1	1.94321	1342.19	2212.02	1.64807
ID_11903819850111017	LC08_119038_20160305	1448.13	T1	2.10483	1401.11	2210.55	1.57771
ID_11903819850111017	LC08_119038_20170308	1448.13	T1	2.13429	1406.67	2215.93	1.5753
ID_11903819850111017	LC08_119038_20171205	1448.13	T1	2.06075	1377.55	2212.74	1.60628
ID_11903819850111017	LC08_119038_20171221	1448.13	T1	2.08838	1385	2208.15	1.59433
ID_11903819850111017	LC08_119038_20180223	1448.13	T1	2.03257	1379.03	2199.8	1.59519
ID_11903819850111017	LC08_119038_20180327	1448.13	T1	2.10899	1396.95	2206.66	1.57962
ID_11903819850111017	LE07_119038_19991228	1448.13	T1	2.01055	1357.25	2229.76	1.64285
ID_11903819850111017	LE07_119038_20000301	1448.13	T1	2.06199	1406.71	2245.07	1.59597
ID_11903819850111017	LE07_119038_20000317	1448.13	T1	2.03077	1355.47	2233.05	1.64743
ID_11903819850111017	LE07_119038_20001128	1448.13	T1	1.98385	1353.67	2207.61	1.63084
ID_11903819850111017	LE07_119038_20010115	1448.13	T1	2.00337	1340.85	2220.73	1.65621
ID_11903819850111017	LE07_119038_20010304	1448.13	T1	2.06176	1403.28	2233.62	1.59172
ID_11903819850111017	LE07_119038_20011115	1448.13	T1	1.99767	1360.47	2229.47	1.63874
ID_11903819850111017	LE07_119038_20020102	1448.13	T1	2.02314	1386.11	2223.27	1.60396
ID_11903819850111017	LE07_119038_20020219	1448.13	T1	2.02537	1388.17	2223.75	1.60193
ID_11903819850111017	LE07_119038_20021118	1448.13	T1	2.00769	1384.84	2234.82	1.61378
ID_11903819850111017	LE07_119038_20030121	1448.13	T1	2.01706	1367.99	2239.42	1.63701
ID_11903819850111017	LE07_119038_20030206	1448.13	T1	2.01161	1343.79	2242.99	1.66915
ID_11903819850111017	LE07_119038_20121129	1448.13	T1	1.93949	1364.41	2202.49	1.61424
ID_11903819850111017	LT05_119038_19850111	1448.13	T1	1.86827	1210.35	2256.63	1.86445
ID_11903819850111017	LT05_119038_19860215	1448.13	T1	1.87295	1218.29	2253.49	1.84972
ID_11903819850111017	LT05_119038_19860303	1448.13	T1	1.95323	1227.38	2277.77	1.85579
ID_11903819850111017	LT05_119038_19870202	1448.13	T1	1.89585	1218.85	2242.26	1.83965
ID_11903819850111017	LT05_119038_19880120	1448.13	T1	1.98884	1232.75	2256.12	1.83015
ID_11903819850111017	LT05_119038_19881103	1448.13	T1	1.93231	1216.66	2212.47	1.81848
ID_11903819850111017	LT05_119038_19881205	1448.13	T1	2.02434	1258.65	2281	1.81225
ID_11903819850111017	LT05_119038_19890327	1448.13	T1	1.86825	1214.62	2252.24	1.85427
ID_11903819850111017	LT05_119038_19891208	1448.13	T1	1.9992	1225.04	2263.75	1.8479
ID_11903819850111017	LT05_119038_19900226	1448.13	T1	1.87598	1193.3	2260.42	1.89425
ID_11903819850111017	LT05_119038_19910317	1448.13	T1	1.89521	1206.48	2225.58	1.84468
ID_11903819850111017	LT05_119038_19911112	1448.13	T1	1.91517	1243.39	2218.46	1.7842
ID_11903819850111017	LT05_119038_19911214	1448.13	T1	1.98269	1277.42	2243.66	1.7564
ID_11903819850111017	LT05_119038_19920115	1448.13	T1	2.10217	1316.93	2314.43	1.75745
ID_11903819850111017	LT05_119038_19920216	1448.13	T1	2.03859	1290.68	2275.85	1.7633
ID_11903819850111017	LT05_119038_19921216	1448.13	T1	1.99942	1291.84	2209.12	1.71006
ID_11903819850111017	LT05_119038_19930202	1448.13	T1	2.09868	1334.05	2281.81	1.71044
ID_11903819850111017	LT05_119038_19931101	1448.13	T1	1.85586	1217.28	2221.29	1.8248
ID_11903819850111017	LT05_119038_19931219	1448.13	T1	1.94202	1246.62	2233.79	1.79188
ID_11903819850111017	LT05_119038_19940325	1448.13	T1	2.00389	1280.19	2256.22	1.76241
ID_11903819850111017	LT05_119038_19941206	1448.13	T1	1.92109	1242.49	2224.46	1.79033
ID_11903819850111017	LT05_119038_19941222	1448.13	T1	1.94324	1268.57	2221.17	1.75093
ID_11903819850111017	LT05_119038_19950107	1448.13	T1	1.95985	1274.55	2216.1	1.73874
ID_11903819850111017	LT05_119038_19951209	1448.13	T1	2.01546	1268.31	2241.12	1.76702
ID_11903819850111017	LT05_119038_19960110	1448.13	T1	2.00778	1259.17	2258.67	1.79377
ID_11903819850111017	LT05_119038_19961211	1448.13	T1	2.04294	1337.18	2260.08	1.69018
ID_11903819850111017	LT05_119038_19970112	1448.13	T1	2.00974	1340.27	2223.69	1.65914
ID_11903819850111017	LT05_119038_19971214	1448.13	T1	2.02198	1305.11	2248.92	1.72317
ID_11903819850111017	LT05_119038_19980131	1448.13	T1	1.93934	1260.66	2223.13	1.76346
ID_11903819850111017	LT05_119038_19981217	1448.13	T1	2.04595	1369.51	2252.14	1.64449
ID_11903819850111017	LT05_119038_19990203	1448.13	T1	2.02386	1354.75	2225.64	1.64285
ID_11903819850111017	LT05_119038_19990219	1448.13	T1	2.01527	1344.37	2221.2	1.65223
ID_11903819850111017	LT05_119038_19991220	1448.13	T1	2.05061	1396.41	2233.03	1.59912
ID_11903819850111017	LT05_119038_20001104	1448.13	T1	1.94863	1316.2	2207.94	1.67751
ID_11903819850111017	LT05_119038_20001206	1448.13	T1	2.03202	1395.86	2226.28	1.59491
ID_11903819850111017	LT05_119038_20001222	1448.13	T1	2.04096	1383.66	2231.36	1.61266
ID_11903819850111017	LT05_119038_20010208	1448.13	T1	2.03104	1369.67	2230.29	1.62835
ID_11903819850111017	LT05_119038_20010312	1448.13	T1	2.01602	1387.74	2234.58	1.61023
ID_11903819850111017	LT05_119038_20020211	1448.13	T1	2.10106	1415.07	2230.41	1.57619
ID_11903819850111017	LT05_119038_20021110	1448.13	T1	1.98391	1344.16	2208.11	1.64274
ID_11903819850111017	LT05_119038_20030113	1448.13	T1	2.06297	1370.9	2241.26	1.63489
ID_11903819850111017	LT05_119038_20031113	1448.13	T1	1.99842	1364.94	2208.02	1.61768
ID_11903819850111017	LT05_119038_20031215	1448.13	T1	2.0128	1358.42	2211.55	1.62803
ID_11903819850111017	LT05_119038_20040304	1448.13	T1	2.07019	1404.22	2226.02	1.58524
ID_11903819850111017	LT05_119038_20041115	1448.13	T1	1.99464	1348.42	2232.67	1.65577
ID_11903819850111017	LT05_119038_20050219	1448.13	T1	2.04245	1377.21	2216.49	1.60941
ID_11903819850111017	LT05_119038_20050307	1448.13	T1	2.06125	1397.97	2213.2	1.58315
ID_11903819850111017	LT05_119038_20050323	1448.13	T1	2.02746	1368.95	2212.66	1.61632
ID_11903819850111017	LT05_119038_20061223	1448.13	T1	2.00984	1401.28	2207.22	1.57515
ID_11903819850111017	LT05_119038_20070108	1448.13	T1	2.03217	1384.98	2228.99	1.6094
ID_11903819850111017	LT05_119038_20070124	1448.13	T1	1.99939	1378.03	2218.09	1.60961
ID_11903819850111017	LT05_119038_20070329	1448.13	T1	2.03734	1388.98	2235.28	1.6093
ID_11903819850111017	LT05_119038_20080212	1448.13	T1	1.99324	1385.35	2204.52	1.59131
ID_11903819850111017	LT05_119038_20080228	1448.13	T1	2.0113	1390.73	2208.94	1.58833
ID_11903819850111017	LT05_119038_20090113	1448.13	T1	2.02335	1400.12	2206.77	1.57613
ID_11903819850111017	LT05_119038_20101202	1448.13	T1	2.1085	1396.29	2263.85	1.62133
ID_11903819850111017	LT05_119038_20101218	1448.13	T1	2.11469	1403.58	2301.64	1.63983
ID_11903819850111017	LT05_119038_20110204	1448.13	T1	2.02496	1387.01	2269.16	1.63601
ID_11903819850111019	LC08_119038_20131210	1433.18	T2	5.03691	1168.68	5620.01	4.80887
ID_11903819850111019	LC08_119038_20140316	1433.18	T2	5.0561	1182.61	5651.52	4.77884
ID_11903819850111019	LC08_119038_20141229	1433.18	T2	4.96948	1159.53	5586.94	4.81826
ID_11903819850111019	LC08_119038_20151216	1433.18	T2	4.67264	1144.69	5445.86	4.75748
ID_11903819850111019	LC08_119038_20160101	1433.18	T2	4.69598	1140.38	5487.53	4.81203
ID_11903819850111019	LC08_119038_20160305	1433.18	T2	5.35272	1171.49	5965.82	5.09249
ID_11903819850111019	LC08_119038_20170308	1433.18	T2	5.4733	1164.12	6042.13	5.19028
ID_11903819850111019	LC08_119038_20171205	1433.18	T2	5.0809	1150.36	5968.84	5.18869
ID_11903819850111019	LC08_119038_20171221	1433.18	T2	5.30181	1151.24	5998.81	5.21076
ID_11903819850111019	LC08_119038_20180223	1433.18	T2	4.8936	1151.37	5545.77	4.81666
ID_11903819850111019	LC08_119038_20180327	1433.18	T2	5.34138	1152.99	5986.54	5.19219
ID_11903819850111019	LE07_119038_19991228	1433.18	T2	4.65595	1430.47	5275.97	3.68827
ID_11903819850111019	LE07_119038_20000301	1433.18	T2	5.53039	1444.3	5633.03	3.90017
ID_11903819850111019	LE07_119038_20000317	1433.18	T2	5.00627	1438.21	5573.18	3.87507
ID_11903819850111019	LE07_119038_20001128	1433.18	T2	4.01546	1381.62	4839.78	3.50297
ID_11903819850111019	LE07_119038_20010115	1433.18	T2	4.32581	1388.69	5150.05	3.70858
ID_11903819850111019	LE07_119038_20010304	1433.18	T2	5.40436	1411.3	5634.39	3.99235
ID_11903819850111019	LE07_119038_20011115	1433.18	T2	4.36141	1382.33	4981.9	3.60399
ID_11903819850111019	LE07_119038_20020102	1433.18	T2	4.75635	1394.75	5129.13	3.67744
ID_11903819850111019	LE07_119038_20020219	1433.18	T2	4.84658	1400.78	5554.07	3.96498
ID_11903819850111019	LE07_119038_20021118	1433.18	T2	4.61875	1328.95	5130.18	3.86033
ID_11903819850111019	LE07_119038_20030121	1433.18	T2	4.64086	1336.18	5068.75	3.79347
ID_11903819850111019	LE07_119038_20030206	1433.18	T2	4.55328	1341.85	5029.53	3.7482
ID_11903819850111019	LE07_119038_20121129	1433.18	T2	4.6639	1162.38	5488.29	4.72159
ID_11903819850111019	LT05_119038_19850111	1433.18	T2	3.78402	1220.6	4866.75	3.98717
ID_11903819850111019	LT05_119038_19860215	1433.18	T2	3.85376	1231.38	4937.59	4.00981
ID_11903819850111019	LT05_119038_19860303	1433.18	T2	4.06111	1223.54	5204.18	4.25338
ID_11903819850111019	LT05_119038_19870202	1433.18	T2	3.79521	1231.83	4882.72	3.96379
ID_11903819850111019	LT05_119038_19880120	1433.18	T2	4.20874	1234.08	5717.37	4.6329
ID_11903819850111019	LT05_119038_19881103	1433.18	T2	4.01401	1222.86	5727.99	4.68411
ID_11903819850111019	LT05_119038_19881205	1433.18	T2	4.59857	1243.55	6211.7	4.99513
ID_11903819850111019	LT05_119038_19890327	1433.18	T2	3.69154	1222.04	4686.77	3.83519
ID_11903819850111019	LT05_119038_19891208	1433.18	T2	4.07222	1219.84	5139.79	4.2135
ID_11903819850111019	LT05_119038_19900226	1433.18	T2	3.64415	1216.12	4680.21	3.84849
ID_11903819850111019	LT05_119038_19910317	1433.18	T2	3.6458	1206.22	4661.05	3.86419
ID_11903819850111019	LT05_119038_19911112	1433.18	T2	3.87816	1210.84	4881.65	4.03164
ID_11903819850111019	LT05_119038_19911214	1433.18	T2	4.23307	1651.05	4872.63	2.95124
ID_11903819850111019	LT05_119038_19920115	1433.18	T2	4.6956	1681.54	5247.9	3.12089
ID_11903819850111019	LT05_119038_19920216	1433.18	T2	4.39818	1682.63	4971.63	2.95468
ID_11903819850111019	LT05_119038_19921216	1433.18	T2	4.22275	1480.07	5039.89	3.40516
ID_11903819850111019	LT05_119038_19930202	1433.18	T2	4.86473	1634.06	5659.14	3.46324
ID_11903819850111019	LT05_119038_19931101	1433.18	T2	3.69783	1201.74	4700.79	3.91167
ID_11903819850111019	LT05_119038_19931219	1433.18	T2	4.02321	1458.62	4790.79	3.28447
ID_11903819850111019	LT05_119038_19940325	1433.18	T2	4.15909	1529.82	4836.91	3.16175
ID_11903819850111019	LT05_119038_19941206	1433.18	T2	3.81619	1197.47	4796.46	4.0055
ID_11903819850111019	LT05_119038_19941222	1433.18	T2	4.01524	1220.54	4614.47	3.78067
ID_11903819850111019	LT05_119038_19950107	1433.18	T2	4.07146	1483.4	4796.16	3.23321
ID_11903819850111019	LT05_119038_19951209	1433.18	T2	4.11733	1542.19	4746.3	3.07763
ID_11903819850111019	LT05_119038_19960110	1433.18	T2	4.17662	1587.27	4769.77	3.00502
ID_11903819850111019	LT05_119038_19961211	1433.18	T2	4.27208	1529.36	4678.49	3.0591
ID_11903819850111019	LT05_119038_19970112	1433.18	T2	4.12912	1485.82	4668.58	3.14208
ID_11903819850111019	LT05_119038_19971214	1433.18	T2	4.11301	1499.17	4697.51	3.13341
ID_11903819850111019	LT05_119038_19980131	1433.18	T2	3.77132	1359.18	4536.63	3.33777
ID_11903819850111019	LT05_119038_19981217	1433.18	T2	5.16965	1468	5670.12	3.86248
ID_11903819850111019	LT05_119038_19990203	1433.18	T2	4.41476	1430.35	4954.41	3.46377
ID_11903819850111019	LT05_119038_19990219	1433.18	T2	4.38482	1427.1	4959.58	3.47529
ID_11903819850111019	LT05_119038_19991220	1433.18	T2	5.23609	1449.65	5640.84	3.89117
ID_11903819850111019	LT05_119038_20001104	1433.18	T2	3.77228	1350.65	4513.65	3.34185
ID_11903819850111019	LT05_119038_20001206	1433.18	T2	5.00676	1391.99	5638.77	4.05088
ID_11903819850111019	LT05_119038_20001222	1433.18	T2	5.27505	1403.49	5625.71	4.00836
ID_11903819850111019	LT05_119038_20010208	1433.18	T2	4.67056	1400.92	5160.97	3.68398
ID_11903819850111019	LT05_119038_20010312	1433.18	T2	4.17126	1392.42	4875.23	3.50126
ID_11903819850111019	LT05_119038_20020211	1433.18	T2	5.55554	1435.11	5638.22	3.92878
ID_11903819850111019	LT05_119038_20021110	1433.18	T2	4.3449	1328.44	5005.34	3.76783
ID_11903819850111019	LT05_119038_20030113	1433.18	T2	5.38006	1347.84	5736.74	4.25626
ID_11903819850111019	LT05_119038_20031113	1433.18	T2	4.66136	1288.95	5161.42	4.00435
ID_11903819850111019	LT05_119038_20031215	1433.18	T2	4.93527	1294.73	5682.17	4.38869
ID_11903819850111019	LT05_119038_20040304	1433.18	T2	5.3107	1308.91	5746.1	4.39
ID_11903819850111019	LT05_119038_20041115	1433.18	T2	4.48476	1273.08	5053.13	3.9692
ID_11903819850111019	LT05_119038_20050219	1433.18	T2	5.08338	1279.66	5649.16	4.41458
ID_11903819850111019	LT05_119038_20050307	1433.18	T2	5.21097	1282.52	5651.13	4.40628
ID_11903819850111019	LT05_119038_20050323	1433.18	T2	4.8956	1289.51	5640.9	4.37445
ID_11903819850111019	LT05_119038_20061223	1433.18	T2	4.88762	1250.05	5600.28	4.48004
ID_11903819850111019	LT05_119038_20070108	1433.18	T2	5.12319	1250.99	5621.29	4.49349
ID_11903819850111019	LT05_119038_20070124	1433.18	T2	4.72861	1243.2	5559.42	4.47186
ID_11903819850111019	LT05_119038_20070329	1433.18	T2	5.08304	1256.23	5623.42	4.47643
ID_11903819850111019	LT05_119038_20080212	1433.18	T2	4.44825	1232.25	5019.9	4.07378
ID_11903819850111019	LT05_119038_20080228	1433.18	T2	4.94401	1238.68	5622.04	4.53875
ID_11903819850111019	LT05_119038_20090113	1433.18	T2	4.77733	1212.37	5136.3	4.23657
ID_11903819850111019	LT05_119038_20101202	1433.18	T2	5.24041	1196.63	5857.18	4.89474
ID_11903819850111019	LT05_119038_20101218	1433.18	T2	5.33559	1200.51	5904.41	4.91826
ID_11903819850111019	LT05_119038_20110204	1433.18	T2	4.92903	1181.56	5586.61	4.72817
ID_11903819850111020	LC08_119038_20131210	1436.09	T1	0.667439	484.975	1978.98	4.08059
ID_11903819850111020	LC08_119038_20140316	1436.09	T1	0.672756	497.225	1968.09	3.95816
ID_11903819850111020	LC08_119038_20141229	1436.09	T1	0.645451	479.194	1915.17	3.99665
ID_11903819850111020	LC08_119038_20151216	1436.09	T1	0.577082	435.996	1874.38	4.29909
ID_11903819850111020	LC08_119038_20160101	1436.09	T1	0.584663	431.879	1873.56	4.33815
ID_11903819850111020	LC08_119038_20160305	1436.09	T1	0.705302	459.369	2006.49	4.36792
ID_11903819850111020	LC08_119038_20170308	1436.09	T1	0.724794	495.856	2158.77	4.35363
ID_11903819850111020	LC08_119038_20171205	1436.09	T1	0.633666	471.93	2058.92	4.36277
ID_11903819850111020	LC08_119038_20171221	1436.09	T1	0.654483	496.202	2073.05	4.17784
ID_11903819850111020	LC08_119038_20180223	1436.09	T1	0.612644	474.792	2018.78	4.25193
ID_11903819850111020	LC08_119038_20180327	1436.09	T1	0.665607	491.788	2112.76	4.29608
ID_11903819850111020	LE07_119038_19991228	1436.09	T1	0.451617	461.991	1551.15	3.35752
ID_11903819850111020	LE07_119038_20000301	1436.09	T1	0.952203	610.129	2465.54	4.04101
ID_11903819850111020	LE07_119038_20000317	1436.09	T1	0.558847	517.278	1665.01	3.21878
ID_11903819850111020	LE07_119038_20001128	1436.09	T1	0.297527	305.039	1421.62	4.66045
ID_11903819850111020	LE07_119038_20010115	1436.09	T1	0.43296	465.656	1496.64	3.21404
ID_11903819850111020	LE07_119038_20010304	1436.09	T1	0.820711	583.808	2209.76	3.78508
ID_11903819850111020	LE07_119038_20011115	1436.09	T1	0.397307	435.74	1494.73	3.43032
ID_11903819850111020	LE07_119038_20020102	1436.09	T1	0.526481	479.54	1634.93	3.40937
ID_11903819850111020	LE07_119038_20020219	1436.09	T1	0.53359	506.155	1608.06	3.17702
ID_11903819850111020	LE07_119038_20021118	1436.09	T1	0.52255	508.719	1767.45	3.47432
ID_11903819850111020	LE07_119038_20030121	1436.09	T1	0.504531	506.896	1578.23	3.11351
ID_11903819850111020	LE07_119038_20030206	1436.09	T1	0.413731	423.981	1560.96	3.68167
ID_11903819850111020	LE07_119038_20121129	1436.09	T1	0.640657	486.142	2069.19	4.25635
ID_11903819850111020	LT05_119038_19850111	1436.09	T1	0.380405	318.53	1727.9	5.42461
ID_11903819850111020	LT05_119038_19860215	1436.09	T1	0.400214	302.663	1719.31	5.68061
ID_11903819850111020	LT05_119038_19860303	1436.09	T1	0.492782	352.961	1830.02	5.18477
ID_11903819850111020	LT05_119038_19870202	1436.09	T1	0.381853	291.833	1661.59	5.69365
ID_11903819850111020	LT05_119038_19880120	1436.09	T1	0.514682	349.2	1864.21	5.33852
ID_11903819850111020	LT05_119038_19881103	1436.09	T1	0.451411	315.54	1869.9	5.92602
ID_11903819850111020	LT05_119038_19881205	1436.09	T1	0.685978	415.41	2108.92	5.07673
ID_11903819850111020	LT05_119038_19890327	1436.09	T1	0.317766	284.286	1576.79	5.54651
ID_11903819850111020	LT05_119038_19891208	1436.09	T1	0.557077	353.619	2042.59	5.77624
ID_11903819850111020	LT05_119038_19900226	1436.09	T1	0.345985	298.294	1784.78	5.98328
ID_11903819850111020	LT05_119038_19910317	1436.09	T1	0.342306	312.474	1760.84	5.63515
ID_11903819850111020	LT05_119038_19911112	1436.09	T1	0.372366	317.53	1775.84	5.59268
ID_11903819850111020	LT05_119038_19911214	1436.09	T1	0.489526	376.823	2075.81	5.50872
ID_11903819850111020	LT05_119038_19920115	1436.09	T1	0.68239	498.345	2429.4	4.87493
ID_11903819850111020	LT05_119038_19920216	1436.09	T1	0.561736	419.811	2206.96	5.25703
ID_11903819850111020	LT05_119038_19921216	1436.09	T1	0.464397	377.118	2010.05	5.33005
ID_11903819850111020	LT05_119038_19930202	1436.09	T1	0.74048	520.335	2514.46	4.83238
ID_11903819850111020	LT05_119038_19931101	1436.09	T1	0.327331	305.015	1587.3	5.20403
ID_11903819850111020	LT05_119038_19931219	1436.09	T1	0.412987	363.469	1735.28	4.77423
ID_11903819850111020	LT05_119038_19940325	1436.09	T1	0.454334	410.599	1780.65	4.33671
ID_11903819850111020	LT05_119038_19941206	1436.09	T1	0.358384	335.184	1621.39	4.83732
ID_11903819850111020	LT05_119038_19950107	1436.09	T1	0.415216	389.633	1696.28	4.35354
ID_11903819850111020	LT05_119038_19951209	1436.09	T1	0.423831	410.908	1607.84	3.9129
ID_11903819850111020	LT05_119038_19960110	1436.09	T1	0.452364	446.031	1656.99	3.71497
ID_11903819850111020	LT05_119038_19961211	1436.09	T1	0.416282	405.975	1559.47	3.84129
ID_11903819850111020	LT05_119038_19970112	1436.09	T1	0.383095	374.125	1531.61	4.09384
ID_11903819850111020	LT05_119038_19971214	1436.09	T1	0.368535	371.565	1494.18	4.02133
ID_11903819850111020	LT05_119038_19980131	1436.09	T1	0.308227	296.125	1479.55	4.99637
ID_11903819850111020	LT05_119038_19981217	1436.09	T1	0.776737	533.92	2303.76	4.31481
ID_11903819850111020	LT05_119038_19990203	1436.09	T1	0.44712	464.489	1524.07	3.28117
ID_11903819850111020	LT05_119038_19990219	1436.09	T1	0.440701	457.988	1534.63	3.3508
ID_11903819850111020	LT05_119038_19991220	1436.09	T1	0.801001	570.562	2354.85	4.12725
ID_11903819850111020	LT05_119038_20001104	1436.09	T1	0.284339	300.876	1418.26	4.71378
ID_11903819850111020	LT05_119038_20001206	1436.09	T1	0.688731	534.408	1989.31	3.72246
ID_11903819850111020	LT05_119038_20001222	1436.09	T1	0.811191	571.399	2221.57	3.88795
ID_11903819850111020	LT05_119038_20010208	1436.09	T1	0.474653	488.828	1585.49	3.24345
ID_11903819850111020	LT05_119038_20010312	1436.09	T1	0.347217	377.812	1449.74	3.83718
ID_11903819850111020	LT05_119038_20020211	1436.09	T1	0.916407	608.741	2363.74	3.88299
ID_11903819850111020	LT05_119038_20021110	1436.09	T1	0.364694	386.24	1494.25	3.86871
ID_11903819850111020	LT05_119038_20030113	1436.09	T1	0.959385	634.538	2233.05	3.51917
ID_11903819850111020	LT05_119038_20031113	1436.09	T1	0.652107	586.368	1880.12	3.20639
ID_11903819850111020	LT05_119038_20031215	1436.09	T1	0.776811	607.321	2012.58	3.31387
ID_11903819850111020	LT05_119038_20040304	1436.09	T1	0.94924	658.532	2223.73	3.3768
ID_11903819850111020	LT05_119038_20041115	1436.09	T1	0.505705	545.618	1548.64	2.83831
ID_11903819850111020	LT05_119038_20050219	1436.09	T1	0.879751	616.683	2158.75	3.50058
ID_11903819850111020	LT05_119038_20050307	1436.09	T1	0.881895	626.289	2162.46	3.45281
ID_11903819850111020	LT05_119038_20050323	1436.09	T1	0.744464	601.797	2008.53	3.33754
ID_11903819850111020	LT05_119038_20061223	1436.09	T1	0.768624	560.632	2122.7	3.78627
ID_11903819850111020	LT05_119038_20070108	1436.09	T1	0.833605	576.209	2165.67	3.75848
ID_11903819850111020	LT05_119038_20070124	1436.09	T1	0.697472	555.828	2054.74	3.69671
ID_11903819850111020	LT05_119038_20070329	1436.09	T1	0.817068	565.696	2146.98	3.79529
ID_11903819850111020	LT05_119038_20080212	1436.09	T1	0.638901	557.57	1987.07	3.5638
ID_11903819850111020	LT05_119038_20080228	1436.09	T1	0.773092	559.192	2106.28	3.76665
ID_11903819850111020	LT05_119038_20090113	1436.09	T1	0.732896	565.293	2074.17	3.66919
ID_11903819850111020	LT05_119038_20101202	1436.09	T1	0.753702	546.842	2007.35	3.67081
ID_11903819850111020	LT05_119038_20101218	1436.09	T1	0.77273	542.475	2009.34	3.70402
ID_11903819850111020	LT05_119038_20110204	1436.09	T1	0.686304	536.614	1919.11	3.57634
ID_11903819920216001	LC08_119038_20131210	1578.92	T1	0.784339	883.592	1318.65	1.49237
ID_11903819920216001	LC08_119038_20140316	1578.92	T1	2.48459	1487.41	3043.67	2.04628
ID_11903819920216001	LC08_119038_20141229	1578.92	T1	0.668593	843.644	1063.73	1.26087
ID_11903819920216001	LC08_119038_20151216	1578.92	T1	1.39543	1040.89	2116.88	2.03373
ID_11903819920216001	LC08_119038_20160101	1578.92	T1	1.07645	952.854	1819.27	1.90928
ID_11903819920216001	LC08_119038_20160305	1578.92	T1	0.486692	751.416	1029	1.36942
ID_11903819920216001	LC08_119038_20170308	1578.92	T1	0.2856	575.47	886.055	1.53971
ID_11903819920216001	LC08_119038_20171205	1578.92	T1	2.48043	1490.17	3460.65	2.32231
ID_11903819920216001	LC08_119038_20171221	1578.92	T1	2.11415	1357.74	3188.66	2.34851
ID_11903819920216001	LC08_119038_20180223	1578.92	T1	1.14336	927.218	1862.05	2.00821
ID_11903819920216001	LC08_119038_20180327	1578.92	T1	0.365296	646.928	857.892	1.3261
ID_11903819920216001	LE07_119038_20001128	1578.92	T1	0.412053	624.192	1510.81	2.42043
ID_11903819920216001	LE07_119038_20011115	1578.92	T1	0.296132	596.411	1337.23	2.24212
ID_11903819920216001	LE07_119038_20020102	1578.92	T1	0.0653578	272.719	490.256	1.79766
ID_11903819920216001	LE07_119038_20021118	1578.92	T1	0.714939	1105.6	1251.53	1.132
ID_11903819920216001	LE07_119038_20030121	1578.92	T1	0.329184	768.539	787.016	1.02404
ID_11903819920216001	LE07_119038_20030206	1578.92	T1	0.27732	659.291	845.717	1.28277
ID_11903819920216001	LE07_119038_20121129	1578.92	T1	1.0341	1013.57	1482.37	1.46252
ID_11903819920216001	LT05_119038_19920216	1578.92	T1	0.0709713	282.767	537.032	1.8992
ID_11903819920216001	LT05_119038_19931101	1578.92	T1	0.133182	397.809	993.328	2.497
ID_11903819920216001	LT05_119038_19940325	1578.92	T1	0.377785	754.437	1529.23	2.02697
ID_11903819920216001	LT05_119038_19941206	1578.92	T1	0.0795806	249.109	581.933	2.33606
ID_11903819920216001	LT05_119038_19941222	1578.92	T1	0.0885946	249.609	546.958	2.19126
ID_11903819920216001	LT05_119038_19951209	1578.92	T1	0.272236	803.73	1185.49	1.47499
ID_11903819920216001	LT05_119038_19971214	1578.92	T1	0.512053	1002.14	1214.78	1.21218
ID_11903819920216001	LT05_119038_19980131	1578.92	T1	0.074577	282.393	566.637	2.00655
ID_11903819920216001	LT05_119038_19981217	1578.92	T1	0.879885	1170.54	2274.23	1.94289
ID_11903819920216001	LT05_119038_19990203	1578.92	T1	0.0577909	316.572	517.7	1.63533
ID_11903819920216001	LT05_119038_20001222	1578.92	T1	0.274947	788.068	1276.33	1.61957
ID_11903819920216001	LT05_119038_20010208	1578.92	T1	0.198676	697.937	732.199	1.04909
ID_11903819920216001	LT05_119038_20020211	1578.92	T1	0.379215	938.789	1751.9	1.86613
ID_11903819920216001	LT05_119038_20021110	1578.92	T1	0.345321	616.631	993.679	1.61146
ID_11903819920216001	LT05_119038_20030113	1578.92	T1	0.0973217	338.414	532.125	1.57241
ID_11903819920216001	LT05_119038_20031113	1578.92	T1	0.717596	1014.94	1249.46	1.23107
ID_11903819920216001	LT05_119038_20031215	1578.92	T1	0.455124	798.146	827.876	1.03725
ID_11903819920216001	LT05_119038_20040304	1578.92	T1	1.07522	1157.77	1324.59	1.14409
ID_11903819920216001	LT05_119038_20041115	1578.92	T1	0.820205	1143.99	1315.67	1.15008
ID_11903819920216001	LT05_119038_20050219	1578.92	T1	0.0841635	223.282	464.169	2.07884
ID_11903819920216001	LT05_119038_20050307	1578.92	T1	0.427232	753.198	764.838	1.01545
ID_11903819920216001	LT05_119038_20050323	1578.92	T1	0.852967	1090.05	1545.61	1.41793
ID_11903819920216001	LT05_119038_20061223	1578.92	T1	0.782277	1107.31	1126.67	1.01749
ID_11903819920216001	LT05_119038_20070108	1578.92	T1	0.802392	1083.01	1103.99	1.01937
ID_11903819920216001	LT05_119038_20070124	1578.92	T1	0.694403	950.08	979.06	1.0305
ID_11903819920216001	LT05_119038_20070329	1578.92	T1	0.168402	513.366	572.764	1.1157
ID_11903819920216001	LT05_119038_20080212	1578.92	T1	0.572188	914.758	921.073	1.0069
ID_11903819920216001	LT05_119038_20080228	1578.92	T1	0.66335	918.735	1023.35	1.11387
ID_11903819920216001	LT05_119038_20090113	1578.92	T1	0.744937	1170.56	1194.64	1.02058
ID_11903819920216001	LT05_119038_20101202	1578.92	T1	0.164539	439.435	581.438	1.32315
ID_11903819920216001	LT05_119038_20101218	1578.92	T1	0.658138	924.642	1029.91	1.11384
ID_11903819920216001	LT05_119038_20110204	1578.92	T1	0.952877	1168.83	1335.89	1.14293
ID_11903819981217004	LC08_119038_20131210	1573.13	T1	0.255082	264.341	1398.43	5.29027
ID_11903819981217004	LC08_119038_20140316	1573.13	T1	0.603309	520.867	2620.38	5.0308
ID_11903819981217004	LC08_119038_20141229	1573.13	T1	0.249242	253.166	1400.64	5.53251
ID_11903819981217004	LC08_119038_20151216	1573.13	T1	0.295808	264.19	1543.14	5.84103
ID_11903819981217004	LC08_119038_20160101	1573.13	T1	0.262479	247.709	1401.04	5.656
ID_11903819981217004	LC08_119038_20160305	1573.13	T1	0.155512	205.071	1168.31	5.69708
ID_11903819981217004	LC08_119038_20171205	1573.13	T1	0.920366	846.008	2094.51	2.47576
ID_11903819981217004	LC08_119038_20171221	1573.13	T1	0.637777	744.451	2074.68	2.78686
ID_11903819981217004	LC08_119038_20180223	1573.13	T1	0.22094	223.886	1298.9	5.80164
ID_11903819981217004	LE07_119038_20001128	1573.13	T1	0.0528248	197.097	580.873	2.94715
ID_11903819981217004	LE07_119038_20011115	1573.13	T1	0.277935	568.779	3335.3	5.86397
ID_11903819981217004	LE07_119038_20020102	1573.13	T1	0.0535158	273.031	385.198	1.41082
ID_11903819981217004	LE07_119038_20021118	1573.13	T1	0.720203	738.788	3560.89	4.81991
ID_11903819981217004	LE07_119038_20030121	1573.13	T1	0.0660344	161.568	701.363	4.34099
ID_11903819981217004	LE07_119038_20121129	1573.13	T1	0.416324	348.213	1819.17	5.22431
ID_11903819981217004	LT05_119038_19981217	1573.13	T1	0.662791	765.823	3355.33	4.38134
ID_11903819981217004	LT05_119038_19990203	1573.13	T1	0.0915102	248.872	647.853	2.60315
ID_11903819981217004	LT05_119038_19990219	1573.13	T1	0.0555956	221.458	522.456	2.35917
ID_11903819981217004	LT05_119038_19991220	1573.13	T1	0.111666	248.456	804.88	3.23952
ID_11903819981217004	LT05_119038_20010208	1573.13	T1	0.270812	690.021	3163.88	4.58519
ID_11903819981217004	LT05_119038_20020211	1573.13	T1	0.334327	751.253	3472.31	4.62203
ID_11903819981217004	LT05_119038_20031113	1573.13	T1	0.336331	783.899	3260.13	4.15887
ID_11903819981217004	LT05_119038_20031215	1573.13	T1	0.135215	233.629	773.47	3.31068
ID_11903819981217004	LT05_119038_20040304	1573.13	T1	0.684325	779.618	3320.29	4.25887
ID_11903819981217004	LT05_119038_20041115	1573.13	T1	0.407638	765.41	3100.94	4.05134
ID_11903819981217004	LT05_119038_20050307	1573.13	T1	0.199954	507.597	597.095	1.17632
ID_11903819981217004	LT05_119038_20050323	1573.13	T1	0.668142	738.392	3109.51	4.21119
ID_11903819981217004	LT05_119038_20061223	1573.13	T1	0.501402	474.005	2857.46	6.02833
ID_11903819981217004	LT05_119038_20070108	1573.13	T1	0.498253	515.903	2881.46	5.58528
ID_11903819981217004	LT05_119038_20070124	1573.13	T1	0.26514	355.997	1202.71	3.37842
ID_11903819981217004	LT05_119038_20080212	1573.13	T1	0.175652	318.008	1120.72	3.5242
ID_11903819981217004	LT05_119038_20080228	1573.13	T1	0.236092	330.905	1153.15	3.48483
ID_11903819981217004	LT05_119038_20090113	1573.13	T1	0.551921	429.579	2618.71	6.09599
ID_11903819981217004	LT05_119038_20101218	1573.13	T1	0.289232	282.095	1456.09	5.16172
ID_11903819981217004	LT05_119038_20110204	1573.13	T1	0.443206	387.469	2115.25	5.45915
ID_12003819851102001	LC08_120038_20131115	1193.58	T4	37.484	5399.15	10569	1.95754
ID_12003819851102001	LC08_120038_20131201	1193.58	T4	37.6292	5404.72	10600.4	1.96133
ID_12003819851102001	LC08_120038_20140102	1193.58	T4	37.7145	5423.89	10627.8	1.95945
ID_12003819851102001	LC08_120038_20141118	1193.58	T4	36.2223	5264.12	10554.5	2.005
ID_12003819851102001	LC08_120038_20141204	1193.58	T4	36.9709	5294.83	10569.4	1.99616
ID_12003819851102001	LC08_120038_20150121	1193.58	T4	37.6958	5395.26	10595.8	1.9639
ID_12003819851102001	LC08_120038_20160124	1193.58	T4	16.2948	4955.27	9404.26	1.89783
ID_12003819851102001	LC08_120038_20160312	1193.58	T4	36.8488	5292.82	10546.1	1.99252
ID_12003819851102001	LC08_120038_20160328	1193.58	T4	35.9738	5248.97	10528.1	2.00574
ID_12003819851102001	LC08_120038_20161209	1193.58	T4	36.7908	5258.95	10553.6	2.0068
ID_12003819851102001	LC08_120038_20170126	1193.58	T4	38.2221	5587.28	10559.2	1.88986
ID_12003819851102001	LC08_120038_20170211	1193.58	T4	37.7067	5362.53	10569.9	1.97106
ID_12003819851102001	LC08_120038_20170227	1193.58	T4	37.6743	5360.01	10568.8	1.97179
ID_12003819851102001	LC08_120038_20170315	1193.58	T4	37.6654	5360.01	10569	1.97183
ID_12003819851102001	LC08_120038_20171126	1193.58	T4	37.2784	5316.22	10518.3	1.97853
ID_12003819851102001	LC08_120038_20171212	1193.58	T4	37.5724	5327.31	10845.5	2.03583
ID_12003819851102001	LE07_120038_19991219	1193.58	T4	36.5605	5541.75	10482.9	1.89163
ID_12003819851102001	LE07_120038_20001103	1193.58	T4	31.3771	5200.35	10603.9	2.03908
ID_12003819851102001	LE07_120038_20001205	1193.58	T4	35.6589	5384.73	10562.1	1.96149
ID_12003819851102001	LE07_120038_20011106	1193.58	T4	35.2357	5372.91	10546.9	1.96298
ID_12003819851102001	LE07_120038_20011224	1193.58	T4	37.0151	5496.82	10726	1.95132
ID_12003819851102001	LE07_120038_20020210	1193.58	T4	37.589	5567.67	10814.4	1.94235
ID_12003819851102001	LE07_120038_20020330	1193.58	T4	35.9358	5390.13	10551.6	1.95758
ID_12003819851102001	LE07_120038_20021109	1193.58	T4	34.3881	5291.54	10550.5	1.99384
ID_12003819851102001	LE07_120038_20021227	1193.58	T4	35.3484	5349.68	10542.4	1.97066
ID_12003819851102001	LE07_120038_20030112	1193.58	T4	36.3519	5374.79	10541.3	1.96125
ID_12003819851102001	LE07_120038_20030128	1193.58	T4	36.6795	5419.18	10531.8	1.94344
ID_12003819851102001	LE07_120038_20121104	1193.58	T4	36.3239	5299.56	10627.1	2.00529
ID_12003819851102001	LT04_120038_19890310	1193.58	T4	33.2034	5253.23	11677.4	2.22291
ID_12003819851102001	LT05_120038_19851102	1193.58	T4	32.0121	5186.56	11532.9	2.2236
ID_12003819851102001	LT05_120038_19851118	1193.58	T4	33.0492	5291.32	11644.5	2.20068
ID_12003819851102001	LT05_120038_19851204	1193.58	T4	34.2565	5621.74	11770.7	2.09378
ID_12003819851102001	LT05_120038_19861105	1193.58	T4	32.4663	5189.83	11679.8	2.25051
ID_12003819851102001	LT05_120038_19861207	1193.58	T4	35.0553	5599.85	11923.6	2.12927
ID_12003819851102001	LT05_120038_19861223	1193.58	T4	35.8896	5623.36	12077.3	2.1477
ID_12003819851102001	LT05_120038_19870209	1193.58	T4	37.0815	5709.04	12036.2	2.10826
ID_12003819851102001	LT05_120038_19880331	1193.58	T4	32.8498	5223.05	11818	2.26267
ID_12003819851102001	LT05_120038_19881110	1193.58	T4	32.1419	5206.82	11570.9	2.22227
ID_12003819851102001	LT05_120038_19881212	1193.58	T4	35.6235	5429.26	11940.3	2.19925
ID_12003819851102001	LT05_120038_19891129	1193.58	T4	31.873	5191.22	11613	2.23705
ID_12003819851102001	LT05_120038_19891215	1193.58	T4	34.368	5371.3	11890.2	2.21366
ID_12003819851102001	LT05_120038_19901218	1193.58	T4	35.1984	5448.91	11942.8	2.19178
ID_12003819851102001	LT05_120038_19910103	1193.58	T4	34.9447	5441.83	11938.4	2.19382
ID_12003819851102001	LT05_120038_19910220	1193.58	T4	33.1636	5236.96	11710.2	2.23607
ID_12003819851102001	LT05_120038_19911103	1193.58	T4	32.8001	5201.99	11695.3	2.24823
ID_12003819851102001	LT05_120038_19920223	1193.58	T4	35.4191	5426.78	11842	2.18214
ID_12003819851102001	LT05_120038_19921121	1193.58	T4	36.3683	5405.63	11848.5	2.19188
ID_12003819851102001	LT05_120038_19921223	1193.58	T4	37.6237	5482.72	11951.4	2.17984
ID_12003819851102001	LT05_120038_19930225	1193.58	T4	36.9529	5434.05	11898.7	2.18966
ID_12003819851102001	LT05_120038_19930329	1193.58	T4	33.0725	5229.76	11659.1	2.22938
ID_12003819851102001	LT05_120038_19931226	1193.58	T4	36.2828	5420.34	11784	2.17403
ID_12003819851102001	LT05_120038_19950130	1193.58	T4	36.488	5429.45	11846	2.18181
ID_12003819851102001	LT05_120038_19950319	1193.58	T4	36.0757	5419.54	11777.6	2.17318
ID_12003819851102001	LT05_120038_19960202	1193.58	T4	37.5778	5489.17	11825.1	2.15426
ID_12003819851102001	LT05_120038_19961218	1193.58	T4	36.6603	5486.89	11472.6	2.0909
ID_12003819851102001	LT05_120038_19971103	1193.58	T4	35.3103	5345.2	11372.8	2.12766
ID_12003819851102001	LT05_120038_19980207	1193.58	T4	35.0102	5312.02	11410.3	2.14802
ID_12003819851102001	LT05_120038_19981106	1193.58	T4	33.9615	5492.45	10570.4	1.92454
ID_12003819851102001	LT05_120038_19981122	1193.58	T4	36.033	5675.51	10395.9	1.83172
ID_12003819851102001	LT05_120038_19981208	1193.58	T4	36.5154	5703.29	10398.5	1.82325
ID_12003819851102001	LT05_120038_19991211	1193.58	T4	35.8081	5492.76	10436.4	1.90002
ID_12003819851102001	LT05_120038_19991227	1193.58	T4	36.6529	5538.31	10479.2	1.89214
ID_12003819851102001	LT05_120038_20000229	1193.58	T4	36.6422	5550.36	10450.2	1.88279
ID_12003819851102001	LT05_120038_20010215	1193.58	T4	36.3511	5428.84	10558.9	1.94497
ID_12003819851102001	LT05_120038_20020306	1193.58	T4	36.5832	5421.77	10669.7	1.96793
ID_12003819851102001	LT05_120038_20030104	1193.58	T4	35.7914	5349.09	10541.6	1.97072
ID_12003819851102001	LT05_120038_20030205	1193.58	T4	36.5293	5412.27	10511.3	1.94212
ID_12003819851102001	LT05_120038_20031104	1193.58	T4	36.04	5342.95	10591.4	1.98232
ID_12003819851102001	LT05_120038_20040208	1193.58	T4	38.1913	5480.71	10671.4	1.94709
ID_12003819851102001	LT05_120038_20041106	1193.58	T4	36.1915	5322.89	10608.7	1.99304
ID_12003819851102001	LT05_120038_20041122	1193.58	T4	36.1387	5331.65	10586.3	1.98556
ID_12003819851102001	LT05_120038_20041208	1193.58	T4	36.727	5381.8	10637.5	1.97657
ID_12003819851102001	LT05_120038_20060128	1193.58	T4	36.9316	5390.78	10555.8	1.95813
ID_12003819851102001	LT05_120038_20070131	1193.58	T4	37.784	5439.87	10650	1.95777
ID_12003819851102001	LT05_120038_20070320	1193.58	T4	36.4567	5331.45	10594.5	1.98716
ID_12003819851102001	LT05_120038_20090309	1193.58	T4	36.072	5324.49	10593.3	1.98954
ID_12003819851102001	LT05_120038_20090325	1193.58	T4	36.3961	5318.94	10590.8	1.99116
ID_12003819851102001	LT05_120038_20100328	1193.58	T4	36.5897	5307.79	10589.9	1.99517
ID_12003819851102001	LT05_120038_20101209	1193.58	T4	37.6281	5383.85	10544.8	1.95859
ID_12003819851102001	LT05_120038_20110110	1193.58	T4	37.1245	5334.31	10549.6	1.97769
ID_12003819851102002	LC08_120038_20131115	1413.95	T3	19.5475	4117.04	5860.88	1.42356
ID_12003819851102002	LC08_120038_20131201	1413.95	T3	19.6072	4134.36	5901.76	1.42749
ID_12003819851102002	LC08_120038_20140102	1413.95	T3	19.4554	4123.25	5880.96	1.42629
ID_12003819851102002	LC08_120038_20141118	1413.95	T3	19.2771	4096.5	5852.57	1.42868
ID_12003819851102002	LC08_120038_20141204	1413.95	T3	19.4943	4114.14	5879.13	1.42901
ID_12003819851102002	LC08_120038_20150121	1413.95	T3	19.0785	4074.96	5852.16	1.43613
ID_12003819851102002	LC08_120038_20160124	1413.95	T3	19.1105	4099.18	5879.32	1.43427
ID_12003819851102002	LC08_120038_20160312	1413.95	T3	18.4677	4040.19	5689.56	1.40824
ID_12003819851102002	LC08_120038_20160328	1413.95	T3	18.4358	4041.57	5693.56	1.40875
ID_12003819851102002	LC08_120038_20161209	1413.95	T3	19.4333	4092.61	5858.09	1.43138
ID_12003819851102002	LC08_120038_20170126	1413.95	T3	19.3006	4069.9	5855.84	1.43882
ID_12003819851102002	LC08_120038_20170211	1413.95	T3	19.4285	4083.73	5886.31	1.44141
ID_12003819851102002	LC08_120038_20170227	1413.95	T3	19.3048	4078.32	5852.22	1.43496
ID_12003819851102002	LC08_120038_20170315	1413.95	T3	18.8373	4065.37	5713.38	1.40538
ID_12003819851102002	LC08_120038_20171126	1413.95	T3	19.2345	4076.47	5878.12	1.44196
ID_12003819851102002	LC08_120038_20171212	1413.95	T3	19.4043	4086.88	5865.93	1.43531
ID_12003819851102002	LE07_120038_19991219	1413.95	T3	19.231	3971.91	5708.33	1.43718
ID_12003819851102002	LE07_120038_20001103	1413.95	T3	16.934	3854.89	5593.06	1.4509
ID_12003819851102002	LE07_120038_20001205	1413.95	T3	18.9885	3972.33	5704.07	1.43595
ID_12003819851102002	LE07_120038_20011106	1413.95	T3	18.0762	3900.5	5634.59	1.44458
ID_12003819851102002	LE07_120038_20011224	1413.95	T3	19.4402	4015.48	5725.2	1.42578
ID_12003819851102002	LE07_120038_20020210	1413.95	T3	19.4552	4027.71	5719.18	1.41996
ID_12003819851102002	LE07_120038_20020330	1413.95	T3	17.9705	3889.97	5634.9	1.44857
ID_12003819851102002	LE07_120038_20021109	1413.95	T3	17.9346	3875.04	5637.51	1.45483
ID_12003819851102002	LE07_120038_20021227	1413.95	T3	19.0151	4063.46	5719.85	1.40763
ID_12003819851102002	LE07_120038_20030112	1413.95	T3	19.5092	4088.91	5733.3	1.40216
ID_12003819851102002	LE07_120038_20030128	1413.95	T3	19.6364	4085.14	5737.82	1.40456
ID_12003819851102002	LE07_120038_20121104	1413.95	T3	19.5475	4117.04	5860.88	1.42356
ID_12003819851102002	LT04_120038_19890310	1413.95	T3	17.8076	3853.64	5642.18	1.46412
ID_12003819851102002	LT05_120038_19851102	1413.95	T3	17.4712	3841.82	5666.42	1.47493
ID_12003819851102002	LT05_120038_19851118	1413.95	T3	18.4391	3863.17	5659.62	1.46502
ID_12003819851102002	LT05_120038_19851204	1413.95	T3	18.7618	3917.48	5669.91	1.44734
ID_12003819851102002	LT05_120038_19861105	1413.95	T3	17.5713	3810.49	5629.37	1.47734
ID_12003819851102002	LT05_120038_19861207	1413.95	T3	18.7296	3971.72	5670.52	1.42772
ID_12003819851102002	LT05_120038_19861223	1413.95	T3	19.0616	4042.93	5686.16	1.40644
ID_12003819851102002	LT05_120038_19870209	1413.95	T3	19.386	4066.18	5700.47	1.40192
ID_12003819851102002	LT05_120038_19880331	1413.95	T3	18.5304	3929.74	5644.56	1.43637
ID_12003819851102002	LT05_120038_19881110	1413.95	T3	17.9982	3860.35	5626.09	1.4574
ID_12003819851102002	LT05_120038_19881212	1413.95	T3	18.8235	3932.21	5680.25	1.44454
ID_12003819851102002	LT05_120038_19891129	1413.95	T3	18.3434	3867.93	5658.74	1.46299
ID_12003819851102002	LT05_120038_19891215	1413.95	T3	18.598	3895.33	5652.16	1.45101
ID_12003819851102002	LT05_120038_19901218	1413.95	T3	19.0147	3972.96	5674.38	1.42825
ID_12003819851102002	LT05_120038_19910103	1413.95	T3	18.7073	3938.89	5665.73	1.43841
ID_12003819851102002	LT05_120038_19910220	1413.95	T3	18.1886	3903.11	5631.76	1.44289
ID_12003819851102002	LT05_120038_19911103	1413.95	T3	18.8123	3888.65	5670.93	1.45833
ID_12003819851102002	LT05_120038_19920223	1413.95	T3	18.7172	3887.66	5633.19	1.44899
ID_12003819851102002	LT05_120038_19921121	1413.95	T3	19.1249	3959.26	5739.08	1.44953
ID_12003819851102002	LT05_120038_19921223	1413.95	T3	19.1497	3966.17	5764.39	1.45339
ID_12003819851102002	LT05_120038_19930225	1413.95	T3	18.7385	3900.36	5677.99	1.45576
ID_12003819851102002	LT05_120038_19930329	1413.95	T3	17.6819	3820.35	5598.03	1.46532
ID_12003819851102002	LT05_120038_19931226	1413.95	T3	18.9948	3914.05	5739.28	1.46633
ID_12003819851102002	LT05_120038_19950130	1413.95	T3	18.729	3876.92	5714.06	1.47386
ID_12003819851102002	LT05_120038_19950319	1413.95	T3	18.2964	3843.41	5657.88	1.4721
ID_12003819851102002	LT05_120038_19960202	1413.95	T3	19.338	3908.96	5828.38	1.49103
ID_12003819851102002	LT05_120038_19961218	1413.95	T3	19.1324	3919.36	5868.11	1.49721
ID_12003819851102002	LT05_120038_19971103	1413.95	T3	18.1311	3866.41	5597.98	1.44785
ID_12003819851102002	LT05_120038_19980207	1413.95	T3	18.8172	3934.51	5662.09	1.43908
ID_12003819851102002	LT05_120038_19981106	1413.95	T3	17.3587	3880.06	5593.44	1.44158
ID_12003819851102002	LT05_120038_19981122	1413.95	T3	18.6314	3940.59	5723.26	1.45239
ID_12003819851102002	LT05_120038_19981208	1413.95	T3	18.5906	3921.57	5727.74	1.46057
ID_12003819851102002	LT05_120038_19991211	1413.95	T3	18.6155	3922.22	5686.98	1.44994
ID_12003819851102002	LT05_120038_19991227	1413.95	T3	18.794	3956.57	5699.87	1.44061
ID_12003819851102002	LT05_120038_20000229	1413.95	T3	19.2505	3965.28	5711.54	1.44039
ID_12003819851102002	LT05_120038_20010215	1413.95	T3	18.9618	3981.51	5699.75	1.43155
ID_12003819851102002	LT05_120038_20020306	1413.95	T3	19.1889	4001.43	5730.3	1.43206
ID_12003819851102002	LT05_120038_20030104	1413.95	T3	18.6184	4028.49	5708.01	1.41691
ID_12003819851102002	LT05_120038_20030205	1413.95	T3	18.8126	4014.5	5692.9	1.41808
ID_12003819851102002	LT05_120038_20031104	1413.95	T3	19.044	4065.45	5697.15	1.40136
ID_12003819851102002	LT05_120038_20040208	1413.95	T3	19.5244	4088.46	5780.46	1.41385
ID_12003819851102002	LT05_120038_20041106	1413.95	T3	19.314	4076.77	5705.15	1.39943
ID_12003819851102002	LT05_120038_20041122	1413.95	T3	19.2687	4071.67	5692.8	1.39815
ID_12003819851102002	LT05_120038_20041208	1413.95	T3	19.532	4086.2	5798.27	1.41899
ID_12003819851102002	LT05_120038_20060128	1413.95	T3	19.4529	4103.93	5768.68	1.40565
ID_12003819851102002	LT05_120038_20070131	1413.95	T3	19.6192	4108.88	5799.87	1.41155
ID_12003819851102002	LT05_120038_20070320	1413.95	T3	18.6418	4042.92	5697.97	1.40937
ID_12003819851102002	LT05_120038_20090309	1413.95	T3	19.0379	4072.32	5701.62	1.40009
ID_12003819851102002	LT05_120038_20090325	1413.95	T3	19.0376	4076.8	5710.62	1.40076
ID_12003819851102002	LT05_120038_20100328	1413.95	T3	19.2222	4090.57	5769.07	1.41033
ID_12003819851102002	LT05_120038_20101209	1413.95	T3	19.0976	4100.29	5687.77	1.38717
ID_12003819851102002	LT05_120038_20110110	1413.95	T3	18.9429	4062	5690.82	1.40099
ID_12003819851102005	LC08_120038_20131115	1243.15	T3	11.5774	2861.3	6944.3	2.42697
ID_12003819851102005	LC08_120038_20131201	1243.15	T3	11.6642	2874.59	6978.52	2.42766
ID_12003819851102005	LC08_120038_20140102	1243.15	T3	11.6183	2880.47	6979.46	2.42303
ID_12003819851102005	LC08_120038_20141118	1243.15	T3	10.9875	2844.58	6910.78	2.42945
ID_12003819851102005	LC08_120038_20141204	1243.15	T3	10.9989	2844.58	6910.78	2.42945
ID_12003819851102005	LC08_120038_20150121	1243.15	T3	11.3615	2952.49	6903.37	2.33815
ID_12003819851102005	LC08_120038_20160124	1243.15	T3	6.24481	2836.8	6832.17	2.4084
ID_12003819851102005	LC08_120038_20160312	1243.15	T3	11.157	2856.79	6842.61	2.39521
ID_12003819851102005	LC08_120038_20160328	1243.15	T3	10.9509	2829.21	6827.24	2.41312
ID_12003819851102005	LC08_120038_20161209	1243.15	T3	10.5803	2820.79	6705.83	2.37729
ID_12003819851102005	LC08_120038_20170126	1243.15	T3	10.6943	2832.58	7156.44	2.52648
ID_12003819851102005	LC08_120038_20170211	1243.15	T3	10.996	2849.38	7567.1	2.6557
ID_12003819851102005	LC08_120038_20170227	1243.15	T3	10.8787	2848.04	7446.93	2.61476
ID_12003819851102005	LC08_120038_20170315	1243.15	T3	10.6897	2828.06	7376.96	2.60849
ID_12003819851102005	LC08_120038_20171126	1243.15	T3	10.5853	2835.05	7308.22	2.57781
ID_12003819851102005	LC08_120038_20171212	1243.15	T3	10.6982	2834.65	7427.15	2.62013
ID_12003819851102005	LE07_120038_19991219	1243.15	T3	12.9785	2784.97	8654.44	3.10755
ID_12003819851102005	LE07_120038_20001103	1243.15	T3	10.8642	2561.18	8427.67	3.29055
ID_12003819851102005	LE07_120038_20001205	1243.15	T3	12.5033	2921.27	8418.41	2.88176
ID_12003819851102005	LE07_120038_20011106	1243.15	T3	12.5046	2908.53	8494.9	2.92068
ID_12003819851102005	LE07_120038_20011224	1243.15	T3	13.5552	2962.22	8667.46	2.92601
ID_12003819851102005	LE07_120038_20020210	1243.15	T3	13.9067	2959.85	8664.26	2.92726
ID_12003819851102005	LE07_120038_20020330	1243.15	T3	12.7527	2910.21	8537.11	2.9335
ID_12003819851102005	LE07_120038_20021109	1243.15	T3	12.0303	2916.63	8434.25	2.89178
ID_12003819851102005	LE07_120038_20021227	1243.15	T3	12.3492	2953.73	8486.6	2.87318
ID_12003819851102005	LE07_120038_20030112	1243.15	T3	13.0026	2984.21	8646.33	2.89736
ID_12003819851102005	LE07_120038_20030128	1243.15	T3	13.2721	3010.24	8667.87	2.87946
ID_12003819851102005	LE07_120038_20121104	1243.15	T3	11.2666	2855.03	7236.03	2.53449
ID_12003819851102005	LT04_120038_19890310	1243.15	T3	13.497	2756.32	8905.76	3.23103
ID_12003819851102005	LT05_120038_19851102	1243.15	T3	12.2989	2724.51	8964.14	3.29019
ID_12003819851102005	LT05_120038_19851118	1243.15	T3	12.7071	2728.73	8969.24	3.28696
ID_12003819851102005	LT05_120038_19851204	1243.15	T3	13.1326	2746.31	8965.28	3.26448
ID_12003819851102005	LT05_120038_19861105	1243.15	T3	12.5684	2718.95	8942.44	3.28893
ID_12003819851102005	LT05_120038_19861207	1243.15	T3	14.1509	2908.34	8975.38	3.08609
ID_12003819851102005	LT05_120038_19861223	1243.15	T3	14.7294	2942.91	8991.81	3.05541
ID_12003819851102005	LT05_120038_19870209	1243.15	T3	15.5941	2991.41	9068.87	3.03164
ID_12003819851102005	LT05_120038_19880331	1243.15	T3	12.6918	2747.08	8910.54	3.24364
ID_12003819851102005	LT05_120038_19881110	1243.15	T3	12.7785	2711.43	8894.1	3.28022
ID_12003819851102005	LT05_120038_19881212	1243.15	T3	14.9269	2891.3	8992.65	3.11024
ID_12003819851102005	LT05_120038_19891129	1243.15	T3	12.6128	2720.71	8842.84	3.25019
ID_12003819851102005	LT05_120038_19891215	1243.15	T3	13.3277	2763.16	8924.09	3.22967
ID_12003819851102005	LT05_120038_19901218	1243.15	T3	14.5798	2889.31	8880.7	3.07364
ID_12003819851102005	LT05_120038_19910103	1243.15	T3	14.2125	2872.86	8887.69	3.09368
ID_12003819851102005	LT05_120038_19910220	1243.15	T3	13.0765	2816.82	8862.7	3.14635
ID_12003819851102005	LT05_120038_19911103	1243.15	T3	12.8114	2731.96	8818.56	3.22793
ID_12003819851102005	LT05_120038_19920223	1243.15	T3	13.7976	2871.72	8878.93	3.09185
ID_12003819851102005	LT05_120038_19921121	1243.15	T3	14.1748	2896.37	8800.42	3.03843
ID_12003819851102005	LT05_120038_19921223	1243.15	T3	14.6386	2962.89	8801.71	2.97065
ID_12003819851102005	LT05_120038_19930225	1243.15	T3	14.5058	2967.83	8813.09	2.96954
ID_12003819851102005	LT05_120038_19930329	1243.15	T3	13.0455	2724.13	8743.03	3.20948
ID_12003819851102005	LT05_120038_19931226	1243.15	T3	13.6777	2824.16	8747.84	3.0975
ID_12003819851102005	LT05_120038_19950130	1243.15	T3	13.766	2969.26	8775.17	2.95534
ID_12003819851102005	LT05_120038_19950319	1243.15	T3	13.6186	2951.2	8784.15	2.97646
ID_12003819851102005	LT05_120038_19960202	1243.15	T3	14.7478	2955.78	8737.92	2.95621
ID_12003819851102005	LT05_120038_19961218	1243.15	T3	14.0336	2938.93	8661.01	2.947
ID_12003819851102005	LT05_120038_19971103	1243.15	T3	13.1995	2963.77	8638.87	2.91482
ID_12003819851102005	LT05_120038_19980207	1243.15	T3	13.0186	2957.38	8631.67	2.91869
ID_12003819851102005	LT05_120038_19981106	1243.15	T3	12.0195	2683.37	8594.5	3.20288
ID_12003819851102005	LT05_120038_19981122	1243.15	T3	13.1858	2838.01	8603.04	3.03137
ID_12003819851102005	LT05_120038_19981208	1243.15	T3	13.4782	2855.95	8635.57	3.02371
ID_12003819851102005	LT05_120038_19991211	1243.15	T3	12.5685	2754.02	8601.45	3.12324
ID_12003819851102005	LT05_120038_19991227	1243.15	T3	13.0466	2796.62	8658.73	3.09614
ID_12003819851102005	LT05_120038_20000229	1243.15	T3	13.0488	2788.84	8644.8	3.09978
ID_12003819851102005	LT05_120038_20010215	1243.15	T3	12.8067	2934.71	8595.49	2.9289
ID_12003819851102005	LT05_120038_20020306	1243.15	T3	13.1843	2932.15	8642.84	2.94761
ID_12003819851102005	LT05_120038_20030104	1243.15	T3	12.545	2962.54	8490.39	2.86591
ID_12003819851102005	LT05_120038_20030205	1243.15	T3	13.0789	2982.69	8688.8	2.91307
ID_12003819851102005	LT05_120038_20031104	1243.15	T3	12.5495	2864.67	8333.38	2.90902
ID_12003819851102005	LT05_120038_20040208	1243.15	T3	14.595	2910.66	8463.18	2.90765
ID_12003819851102005	LT05_120038_20041106	1243.15	T3	12.9655	2876.1	8197.92	2.85037
ID_12003819851102005	LT05_120038_20041122	1243.15	T3	12.8577	2872.91	8194.19	2.85223
ID_12003819851102005	LT05_120038_20041208	1243.15	T3	13.4084	2896.95	8199.38	2.83035
ID_12003819851102005	LT05_120038_20060128	1243.15	T3	13.5969	2941.26	7907.53	2.68849
ID_12003819851102005	LT05_120038_20070131	1243.15	T3	14.0644	2937.22	7834.09	2.66717
ID_12003819851102005	LT05_120038_20070320	1243.15	T3	12.6856	2903.09	7821.66	2.69425
ID_12003819851102005	LT05_120038_20090309	1243.15	T3	12.8879	2978.35	7556.67	2.5372
ID_12003819851102005	LT05_120038_20090325	1243.15	T3	13.0125	2981.8	7559.43	2.53519
ID_12003819851102005	LT05_120038_20100328	1243.15	T3	13.405	3010.04	7514.76	2.49657
ID_12003819851102005	LT05_120038_20101209	1243.15	T3	13.3218	2960.67	7508.44	2.53606
ID_12003819851102005	LT05_120038_20110110	1243.15	T3	13.0686	2954.91	7408.25	2.5071
ID_12003819851102008	LC08_120038_20131115	1260.58	T4	58.3699	5642.85	17789.6	3.15259
ID_12003819851102008	LC08_120038_20131201	1260.58	T4	58.4925	5640.45	17846.6	3.16404
ID_12003819851102008	LC08_120038_20140102	1260.58	T4	58.3329	5644	17850.2	3.16268
ID_12003819851102008	LC08_120038_20141118	1260.58	T4	57.6466	5624.06	17788.4	3.16291
ID_12003819851102008	LC08_120038_20141204	1260.58	T4	57.8224	5631.18	17796.9	3.16041
ID_12003819851102008	LC08_120038_20150121	1260.58	T4	58.2048	5656.16	17799.9	3.14699
ID_12003819851102008	LC08_120038_20160124	1260.58	T4	57.8923	5705.17	17789.6	3.11815
ID_12003819851102008	LC08_120038_20160312	1260.58	T4	57.8896	5686.04	17751.3	3.1219
ID_12003819851102008	LC08_120038_20160328	1260.58	T4	57.5634	5679.46	17759.1	3.1269
ID_12003819851102008	LC08_120038_20161209	1260.58	T4	57.907	5760.29	17802.5	3.09055
ID_12003819851102008	LC08_120038_20170126	1260.58	T4	58.1495	5772.07	17802.3	3.08422
ID_12003819851102008	LC08_120038_20170211	1260.58	T4	58.3924	5767.19	17812.5	3.08859
ID_12003819851102008	LC08_120038_20170227	1260.58	T4	58.1275	5805.15	17822	3.07003
ID_12003819851102008	LC08_120038_20170315	1260.58	T4	57.9224	5717.44	17823	3.11731
ID_12003819851102008	LC08_120038_20171126	1260.58	T4	58.2394	5640.62	17817.7	3.15882
ID_12003819851102008	LC08_120038_20171212	1260.58	T4	58.3856	5649.7	17820.5	3.15423
ID_12003819851102008	LE07_120038_19991219	1260.58	T4	60.5163	5912.73	17850.3	3.01895
ID_12003819851102008	LE07_120038_20001103	1260.58	T4	56.9934	5705.31	17777.9	3.11603
ID_12003819851102008	LE07_120038_20001205	1260.58	T4	58.5101	5704.27	17831.5	3.12599
ID_12003819851102008	LE07_120038_20011106	1260.58	T4	58.4607	5702.61	17835.2	3.12755
ID_12003819851102008	LE07_120038_20011224	1260.58	T4	60.3516	5946.45	17868.9	3.00497
ID_12003819851102008	LE07_120038_20020210	1260.58	T4	60.6468	5945.68	17858.8	3.00366
ID_12003819851102008	LE07_120038_20020330	1260.58	T4	58.4669	5696.07	17833.9	3.13091
ID_12003819851102008	LE07_120038_20021109	1260.58	T4	57.5069	5666.56	17813.6	3.14363
ID_12003819851102008	LE07_120038_20021227	1260.58	T4	58.0769	5681.71	17813.8	3.13528
ID_12003819851102008	LE07_120038_20030112	1260.58	T4	59.4323	5869.83	17812.1	3.03451
ID_12003819851102008	LE07_120038_20030128	1260.58	T4	59.8133	5871.82	17865.5	3.04259
ID_12003819851102008	LE07_120038_20121104	1260.58	T4	57.8705	5627.41	17780.1	3.15956
ID_12003819851102008	LT04_120038_19890310	1260.58	T4	60.5158	5867.05	18034.7	3.0739
ID_12003819851102008	LT05_120038_19851102	1260.58	T4	59.4552	5863.24	18033.2	3.07563
ID_12003819851102008	LT05_120038_19851118	1260.58	T4	60.3037	5888.74	18079.6	3.07019
ID_12003819851102008	LT05_120038_19851204	1260.58	T4	61.0661	5892.35	18153.5	3.08085
ID_12003819851102008	LT05_120038_19861105	1260.58	T4	59.8791	5857.09	18045.4	3.08095
ID_12003819851102008	LT05_120038_19861207	1260.58	T4	61.8871	6109.53	18197.8	2.9786
ID_12003819851102008	LT05_120038_19861223	1260.58	T4	63.0471	6109.33	18218	2.982
ID_12003819851102008	LT05_120038_19870209	1260.58	T4	63.0471	6109.33	18218	2.982
ID_12003819851102008	LT05_120038_19880331	1260.58	T4	59.9984	5865.64	18070.4	3.08072
ID_12003819851102008	LT05_120038_19881110	1260.58	T4	59.6936	5857.61	18007.2	3.07415
ID_12003819851102008	LT05_120038_19881212	1260.58	T4	63.3409	6101.73	18243.6	2.98992
ID_12003819851102008	LT05_120038_19891129	1260.58	T4	59.9028	5857.23	17978.9	3.06952
ID_12003819851102008	LT05_120038_19891215	1260.58	T4	61.4915	6076.85	18082	2.97555
ID_12003819851102008	LT05_120038_19901218	1260.58	T4	62.6049	6066.36	18070.8	2.97886
ID_12003819851102008	LT05_120038_19910103	1260.58	T4	62.0117	6057.36	18057.8	2.98113
ID_12003819851102008	LT05_120038_19910220	1260.58	T4	60.4091	5858.3	17980.5	3.06923
ID_12003819851102008	LT05_120038_19911103	1260.58	T4	60.0259	5842.23	17936.5	3.07014
ID_12003819851102008	LT05_120038_19920223	1260.58	T4	61.9059	6053.7	18052.5	2.98206
ID_12003819851102008	LT05_120038_19921121	1260.58	T4	62.2863	6058.3	18054.8	2.98018
ID_12003819851102008	LT05_120038_19921223	1260.58	T4	62.9661	6064.36	18112.2	2.98666
ID_12003819851102008	LT05_120038_19930225	1260.58	T4	63.001	6069.11	18091.8	2.98096
ID_12003819851102008	LT05_120038_19930329	1260.58	T4	59.7752	5814.13	17935.6	3.08484
ID_12003819851102008	LT05_120038_19931226	1260.58	T4	62.0684	6048.23	18017.1	2.97891
ID_12003819851102008	LT05_120038_19950130	1260.58	T4	61.9356	6030.92	17969.9	2.97962
ID_12003819851102008	LT05_120038_19950319	1260.58	T4	61.8463	6036.06	17977.6	2.97837
ID_12003819851102008	LT05_120038_19960202	1260.58	T4	62.2668	6034.48	18043.7	2.9901
ID_12003819851102008	LT05_120038_19961218	1260.58	T4	61.3964	5966.5	17921.2	3.00363
ID_12003819851102008	LT05_120038_19971103	1260.58	T4	59.3732	5752.12	17893	3.11069
ID_12003819851102008	LT05_120038_19980207	1260.58	T4	59.2115	5756.41	17850.6	3.101
ID_12003819851102008	LT05_120038_19981106	1260.58	T4	58.5213	5740.25	17846.5	3.10901
ID_12003819851102008	LT05_120038_19981122	1260.58	T4	60.6545	5913.4	17884.2	3.02436
ID_12003819851102008	LT05_120038_19981208	1260.58	T4	61.0978	5937.69	17915.8	3.01729
ID_12003819851102008	LT05_120038_19991211	1260.58	T4	59.9775	5728.47	17846.3	3.11537
ID_12003819851102008	LT05_120038_19991227	1260.58	T4	60.6281	5906.39	17897.4	3.03018
ID_12003819851102008	LT05_120038_20000229	1260.58	T4	60.5891	5931.54	17902.1	3.01812
ID_12003819851102008	LT05_120038_20010215	1260.58	T4	59.5153	5913.27	17852.6	3.01907
ID_12003819851102008	LT05_120038_20020306	1260.58	T4	59.9606	5928.86	17855.5	3.01162
ID_12003819851102008	LT05_120038_20030104	1260.58	T4	58.169	5682.77	17840.4	3.13939
ID_12003819851102008	LT05_120038_20030205	1260.58	T4	59.6618	5884.33	17843.3	3.03235
ID_12003819851102008	LT05_120038_20031104	1260.58	T4	58.0167	5677.4	17817.6	3.13834
ID_12003819851102008	LT05_120038_20040208	1260.58	T4	60.6214	5927	17877.8	3.01633
ID_12003819851102008	LT05_120038_20041106	1260.58	T4	58.5718	5667.47	17787.7	3.13855
ID_12003819851102008	LT05_120038_20041122	1260.58	T4	57.7378	5667.53	17805.1	3.14161
ID_12003819851102008	LT05_120038_20041208	1260.58	T4	59.199	5896.07	17817.3	3.0219
ID_12003819851102008	LT05_120038_20060128	1260.58	T4	58.926	5905.61	17807.3	3.01531
ID_12003819851102008	LT05_120038_20070131	1260.58	T4	59.1435	5901.04	17781.9	3.01335
ID_12003819851102008	LT05_120038_20070320	1260.58	T4	58.2501	5654.74	17776.5	3.14365
ID_12003819851102008	LT05_120038_20090309	1260.58	T4	57.9922	5649.83	17748.3	3.14138
ID_12003819851102008	LT05_120038_20090325	1260.58	T4	58.0696	5654.37	17751.7	3.13946
ID_12003819851102008	LT05_120038_20100328	1260.58	T4	58.0328	5648.37	17742.6	3.1412
ID_12003819851102008	LT05_120038_20101209	1260.58	T4	58.6662	5654.96	17785.5	3.14512
ID_12003819851102008	LT05_120038_20110110	1260.58	T4	58.5046	5657.35	17823.7	3.15055
ID_12003819851102012	LC08_120038_20131115	1269.64	T2	3.1857	1221.02	3916.33	3.20743
ID_12003819851102012	LC08_120038_20131201	1269.64	T2	3.20116	1229.79	3920.79	3.18817
ID_12003819851102012	LC08_120038_20140102	1269.64	T2	3.17312	1220.82	3906.97	3.20027
ID_12003819851102012	LC08_120038_20141118	1269.64	T2	3.03768	1170.99	3803.13	3.24778
ID_12003819851102012	LC08_120038_20141204	1269.64	T2	3.06473	1182.21	3836.99	3.2456
ID_12003819851102012	LC08_120038_20150121	1269.64	T2	3.24017	1318.64	3798.27	2.88044
ID_12003819851102012	LC08_120038_20160124	1269.64	T2	2.9003	1184.91	3681.35	3.10686
ID_12003819851102012	LC08_120038_20160312	1269.64	T2	2.96878	1171.63	3635.53	3.10296
ID_12003819851102012	LC08_120038_20160328	1269.64	T2	2.93025	1155.77	3621.05	3.13302
ID_12003819851102012	LC08_120038_20161209	1269.64	T2	2.72227	1532.1	2916.38	1.90352
ID_12003819851102012	LC08_120038_20170126	1269.64	T2	2.72725	1514.23	2955.26	1.95166
ID_12003819851102012	LC08_120038_20170211	1269.64	T2	2.83895	1526.71	3285.4	2.15194
ID_12003819851102012	LC08_120038_20170227	1269.64	T2	2.7417	1583.44	2897.93	1.83015
ID_12003819851102012	LC08_120038_20170315	1269.64	T2	2.70775	1495.95	2970.69	1.98582
ID_12003819851102012	LC08_120038_20171126	1269.64	T2	2.68279	1502.72	2708.68	1.80252
ID_12003819851102012	LC08_120038_20171212	1269.64	T2	2.69454	1534.1	2695.87	1.7573
ID_12003819851102012	LE07_120038_19991219	1269.64	T2	3.48617	1217.39	4265.32	3.50366
ID_12003819851102012	LE07_120038_20001103	1269.64	T2	3.28093	1163.24	4092.46	3.51816
ID_12003819851102012	LE07_120038_20001205	1269.64	T2	3.39126	1208.45	4166.79	3.44803
ID_12003819851102012	LE07_120038_20011106	1269.64	T2	3.38465	1191.15	4126.72	3.46449
ID_12003819851102012	LE07_120038_20011224	1269.64	T2	3.48929	1211.66	4182.72	3.45205
ID_12003819851102012	LE07_120038_20020210	1269.64	T2	3.51846	1221.37	4190.18	3.43073
ID_12003819851102012	LE07_120038_20020330	1269.64	T2	3.38335	1187.65	4133.3	3.48024
ID_12003819851102012	LE07_120038_20021109	1269.64	T2	3.28026	1171.6	4097.56	3.4974
ID_12003819851102012	LE07_120038_20021227	1269.64	T2	3.34183	1192.66	4105.74	3.44251
ID_12003819851102012	LE07_120038_20030112	1269.64	T2	3.40053	1200.86	4151.45	3.45706
ID_12003819851102012	LE07_120038_20030128	1269.64	T2	3.4488	1203.08	4167.27	3.46383
ID_12003819851102012	LE07_120038_20121104	1269.64	T2	3.13566	1201.04	3900.35	3.24749
ID_12003819851102012	LT04_120038_19890310	1269.64	T2	4.20869	1329.91	4862.13	3.65597
ID_12003819851102012	LT05_120038_19851102	1269.64	T2	4.2677	1345.9	4883.15	3.62816
ID_12003819851102012	LT05_120038_19851118	1269.64	T2	4.46504	1426.26	4943.06	3.46574
ID_12003819851102012	LT05_120038_19851204	1269.64	T2	4.64052	1483.72	4975.37	3.35332
ID_12003819851102012	LT05_120038_19861105	1269.64	T2	4.34408	1384.44	4868.05	3.51627
ID_12003819851102012	LT05_120038_19861207	1269.64	T2	4.68576	1495.07	4903.59	3.27984
ID_12003819851102012	LT05_120038_19861223	1269.64	T2	4.78496	1536.67	4961.53	3.22875
ID_12003819851102012	LT05_120038_19870209	1269.64	T2	4.96819	1581.07	4993.21	3.15812
ID_12003819851102012	LT05_120038_19880331	1269.64	T2	4.23522	1364.66	4875.68	3.57282
ID_12003819851102012	LT05_120038_19881110	1269.64	T2	4.07263	1282.94	4877.62	3.8019
ID_12003819851102012	LT05_120038_19881212	1269.64	T2	4.44576	1406.7	4924.47	3.50073
ID_12003819851102012	LT05_120038_19891129	1269.64	T2	4.01195	1250.41	4823.27	3.85734
ID_12003819851102012	LT05_120038_19891215	1269.64	T2	4.1965	1301.67	4915.81	3.77653
ID_12003819851102012	LT05_120038_19901218	1269.64	T2	4.14109	1313.29	4642.66	3.53513
ID_12003819851102012	LT05_120038_19910103	1269.64	T2	4.1089	1295.15	4614.85	3.56318
ID_12003819851102012	LT05_120038_19910220	1269.64	T2	4.02593	1270.44	4556.75	3.58676
ID_12003819851102012	LT05_120038_19911103	1269.64	T2	3.90659	1239.92	4494.79	3.62507
ID_12003819851102012	LT05_120038_19920223	1269.64	T2	3.98919	1277.81	4490.79	3.51443
ID_12003819851102012	LT05_120038_19921121	1269.64	T2	4.02653	1272.62	4665.58	3.66612
ID_12003819851102012	LT05_120038_19921223	1269.64	T2	4.08939	1286.91	4724.7	3.67136
ID_12003819851102012	LT05_120038_19930225	1269.64	T2	4.09757	1273.09	4698.43	3.69057
ID_12003819851102012	LT05_120038_19930329	1269.64	T2	3.87063	1233.07	4466.99	3.62264
ID_12003819851102012	LT05_120038_19931226	1269.64	T2	3.97758	1239.81	4577.1	3.69178
ID_12003819851102012	LT05_120038_19950130	1269.64	T2	3.96449	1255.31	4530.44	3.60901
ID_12003819851102012	LT05_120038_19950319	1269.64	T2	3.96554	1255.44	4504.98	3.58838
ID_12003819851102012	LT05_120038_19960202	1269.64	T2	4.10814	1276.04	4491.86	3.52014
ID_12003819851102012	LT05_120038_19961218	1269.64	T2	3.96097	1425.94	4459.41	3.12735
ID_12003819851102012	LT05_120038_19971103	1269.64	T2	3.71723	1220.83	4363.44	3.57417
ID_12003819851102012	LT05_120038_19980207	1269.64	T2	3.72441	1232.19	4353.18	3.53287
ID_12003819851102012	LT05_120038_19981106	1269.64	T2	3.50169	1179.11	4326.44	3.66923
ID_12003819851102012	LT05_120038_19981122	1269.64	T2	3.60141	1201.98	4398.63	3.65948
ID_12003819851102012	LT05_120038_19981208	1269.64	T2	3.66014	1240.34	4367.53	3.52124
ID_12003819851102012	LT05_120038_19991211	1269.64	T2	3.48413	1209.25	4234.4	3.50168
ID_12003819851102012	LT05_120038_19991227	1269.64	T2	3.50764	1208.12	4265.74	3.53088
ID_12003819851102012	LT05_120038_20000229	1269.64	T2	3.50399	1195.5	4268.63	3.57059
ID_12003819851102012	LT05_120038_20010215	1269.64	T2	3.45109	1193.39	4176.21	3.49946
ID_12003819851102012	LT05_120038_20020306	1269.64	T2	3.47688	1210.69	4190.1	3.46092
ID_12003819851102012	LT05_120038_20030104	1269.64	T2	3.35601	1206.86	4106.74	3.40282
ID_12003819851102012	LT05_120038_20030205	1269.64	T2	3.43791	1213.52	4156.58	3.42523
ID_12003819851102012	LT05_120038_20031104	1269.64	T2	3.31965	1178.1	4090.02	3.47172
ID_12003819851102012	LT05_120038_20040208	1269.64	T2	3.49323	1230.49	4151	3.37345
ID_12003819851102012	LT05_120038_20041106	1269.64	T2	3.32288	1179.23	4064.35	3.44663
ID_12003819851102012	LT05_120038_20041122	1269.64	T2	3.31037	1185.7	4047.58	3.41367
ID_12003819851102012	LT05_120038_20041208	1269.64	T2	3.37511	1204.22	4060.36	3.37177
ID_12003819851102012	LT05_120038_20060128	1269.64	T2	3.36974	1332.84	3973.54	2.98126
ID_12003819851102012	LT05_120038_20070131	1269.64	T2	3.40458	1348.76	3975.79	2.94775
ID_12003819851102012	LT05_120038_20070320	1269.64	T2	3.25449	1205.45	3953.81	3.27994
ID_12003819851102012	LT05_120038_20090309	1269.64	T2	3.26656	1369.49	3920.23	2.86254
ID_12003819851102012	LT05_120038_20090325	1269.64	T2	3.29117	1365.73	3968.88	2.90606
ID_12003819851102012	LT05_120038_20100328	1269.64	T2	3.3099	1440.19	3895.64	2.70495
ID_12003819851102012	LT05_120038_20101209	1269.64	T2	3.3008	1236.05	3948.91	3.19478
ID_12003819851102012	LT05_120038_20110110	1269.64	T2	3.30355	1243.6	3978.16	3.19891
ID_12003819851102016	LC08_120038_20131115	1274.67	T3	9.59474	1922.95	7495.96	3.89815
ID_12003819851102016	LC08_120038_20131201	1274.67	T3	9.64027	1925.01	7558.37	3.92641
ID_12003819851102016	LC08_120038_20140102	1274.67	T3	9.567	1915.59	7513.37	3.92222
ID_12003819851102016	LC08_120038_20141118	1274.67	T3	9.36888	1911.85	7452.25	3.89792
ID_12003819851102016	LC08_120038_20141204	1274.67	T3	9.42082	1918.77	7484.54	3.90071
ID_12003819851102016	LC08_120038_20150121	1274.67	T3	9.50785	1920.04	7499.24	3.90578
ID_12003819851102016	LC08_120038_20160124	1274.67	T3	9.4178	1911	7486.25	3.91745
ID_12003819851102016	LC08_120038_20160312	1274.67	T3	9.38705	1913.02	7446.91	3.89275
ID_12003819851102016	LC08_120038_20160328	1274.67	T3	9.3124	1900.46	7486.26	3.93918
ID_12003819851102016	LC08_120038_20161209	1274.67	T3	9.41714	1924.82	7449.6	3.87028
ID_12003819851102016	LC08_120038_20170126	1274.67	T3	9.41582	1916.9	7449.52	3.88624
ID_12003819851102016	LC08_120038_20170211	1274.67	T3	9.56714	1943.51	7543.57	3.88141
ID_12003819851102016	LC08_120038_20170227	1274.67	T3	9.43963	1924.19	7450.13	3.87183
ID_12003819851102016	LC08_120038_20170315	1274.67	T3	9.3953	1912.44	7451.15	3.89615
ID_12003819851102016	LC08_120038_20171126	1274.67	T3	9.50438	1926.48	7513.05	3.89989
ID_12003819851102016	LC08_120038_20171212	1274.67	T3	9.51084	1923.62	7513.22	3.90578
ID_12003819851102016	LE07_120038_19991219	1274.67	T3	10.0373	1938.64	8503.15	4.38615
ID_12003819851102016	LE07_120038_20001103	1274.67	T3	8.94911	1887.5	7129.08	3.777
ID_12003819851102016	LE07_120038_20001205	1274.67	T3	9.58766	1922.21	8434.59	4.38797
ID_12003819851102016	LE07_120038_20011106	1274.67	T3	9.55486	1924.92	8453.22	4.39146
ID_12003819851102016	LE07_120038_20011224	1274.67	T3	10.0676	1935.56	8554.28	4.41953
ID_12003819851102016	LE07_120038_20020210	1274.67	T3	10.1258	1935.3	8547.01	4.41637
ID_12003819851102016	LE07_120038_20020330	1274.67	T3	9.52103	1913.26	8413.38	4.3974
ID_12003819851102016	LE07_120038_20021109	1274.67	T3	9.27363	1905	7281.26	3.82219
ID_12003819851102016	LE07_120038_20021227	1274.67	T3	9.5472	1921.19	8539.93	4.44513
ID_12003819851102016	LE07_120038_20030112	1274.67	T3	9.83766	1924.09	8611.48	4.47562
ID_12003819851102016	LE07_120038_20030128	1274.67	T3	9.97395	1931.52	8648.54	4.47758
ID_12003819851102016	LE07_120038_20121104	1274.67	T3	9.42525	1914.61	7536.05	3.93607
ID_12003819851102016	LT04_120038_19890310	1274.67	T3	9.88896	2164.3	6553.85	3.02816
ID_12003819851102016	LT05_120038_19851102	1274.67	T3	9.47012	2167.24	6084.29	2.80738
ID_12003819851102016	LT05_120038_19851118	1274.67	T3	9.62071	2177.16	6205.38	2.85022
ID_12003819851102016	LT05_120038_19851204	1274.67	T3	9.74369	2185.64	6273.85	2.87049
ID_12003819851102016	LT05_120038_19861105	1274.67	T3	9.55961	2177.73	6275.75	2.88179
ID_12003819851102016	LT05_120038_19861207	1274.67	T3	9.86144	2185.57	6435.63	2.9446
ID_12003819851102016	LT05_120038_19861223	1274.67	T3	9.98738	2196.85	6495	2.95651
ID_12003819851102016	LT05_120038_19870209	1274.67	T3	10.1685	2209.77	6571.36	2.97378
ID_12003819851102016	LT05_120038_19880331	1274.67	T3	9.65118	2168.76	6426.08	2.96302
ID_12003819851102016	LT05_120038_19881110	1274.67	T3	9.67462	2143.18	6586.16	3.07308
ID_12003819851102016	LT05_120038_19881212	1274.67	T3	10.2335	2183.98	6687.13	3.0619
ID_12003819851102016	LT05_120038_19891129	1274.67	T3	9.80194	2122.93	6716.49	3.16378
ID_12003819851102016	LT05_120038_19891215	1274.67	T3	10.09	2139.45	6888.95	3.21996
ID_12003819851102016	LT05_120038_19901218	1274.67	T3	10.2095	2145.44	6956.27	3.24236
ID_12003819851102016	LT05_120038_19910103	1274.67	T3	10.1127	2128.31	6956.82	3.26871
ID_12003819851102016	LT05_120038_19910220	1274.67	T3	9.93333	2119.85	6850.8	3.23174
ID_12003819851102016	LT05_120038_19911103	1274.67	T3	9.94502	2110.67	6982.38	3.30813
ID_12003819851102016	LT05_120038_19920223	1274.67	T3	10.1316	2110.51	7021.84	3.32708
ID_12003819851102016	LT05_120038_19921121	1274.67	T3	10.2133	2100.79	7279.77	3.46525
ID_12003819851102016	LT05_120038_19921223	1274.67	T3	10.3116	2100.12	7308.63	3.4801
ID_12003819851102016	LT05_120038_19930225	1274.67	T3	10.334	2123.77	7221.84	3.40048
ID_12003819851102016	LT05_120038_19930329	1274.67	T3	9.86925	2102.1	7075.33	3.36584
ID_12003819851102016	LT05_120038_19931226	1274.67	T3	10.1099	2098.43	7218.04	3.43974
ID_12003819851102016	LT05_120038_19950130	1274.67	T3	10.1104	2104.75	7249.57	3.44439
ID_12003819851102016	LT05_120038_19950319	1274.67	T3	10.0938	2083.58	7173.08	3.44267
ID_12003819851102016	LT05_120038_19960202	1274.67	T3	10.3099	2072.37	7534.06	3.63548
ID_12003819851102016	LT05_120038_19961218	1274.67	T3	10.1426	2033.28	7695.6	3.78483
ID_12003819851102016	LT05_120038_19971103	1274.67	T3	9.86524	2014.4	7593.66	3.76968
ID_12003819851102016	LT05_120038_19980207	1274.67	T3	9.80838	2007.02	7550.82	3.7622
ID_12003819851102016	LT05_120038_19981106	1274.67	T3	9.36437	1969.09	7289.69	3.70207
ID_12003819851102016	LT05_120038_19981122	1274.67	T3	10.0518	1984.58	8144.33	4.10381
ID_12003819851102016	LT05_120038_19981208	1274.67	T3	10.2039	1975.14	8169.64	4.13623
ID_12003819851102016	LT05_120038_19991211	1274.67	T3	9.88302	1936.19	8453.55	4.36607
ID_12003819851102016	LT05_120038_19991227	1274.67	T3	10.1002	1938.31	8481.83	4.3759
ID_12003819851102016	LT05_120038_20000229	1274.67	T3	10.0724	1937.35	8496.65	4.3857
ID_12003819851102016	LT05_120038_20010215	1274.67	T3	9.80374	1931.9	8461.29	4.37978
ID_12003819851102016	LT05_120038_20020306	1274.67	T3	9.9245	1928.74	8521.18	4.41801
ID_12003819851102016	LT05_120038_20030104	1274.67	T3	9.58559	1921.45	8543.84	4.44656
ID_12003819851102016	LT05_120038_20030205	1274.67	T3	9.91925	1931.32	8621.81	4.46421
ID_12003819851102016	LT05_120038_20031104	1274.67	T3	9.57563	1924.31	8638.86	4.48932
ID_12003819851102016	LT05_120038_20040208	1274.67	T3	10.1875	1938.84	8704.16	4.48936
ID_12003819851102016	LT05_120038_20041106	1274.67	T3	9.71606	1923.27	8685.22	4.51586
ID_12003819851102016	LT05_120038_20041122	1274.67	T3	9.63959	1924.4	8716.93	4.52968
ID_12003819851102016	LT05_120038_20041208	1274.67	T3	9.88154	1918.69	8683.68	4.52585
ID_12003819851102016	LT05_120038_20060128	1274.67	T3	9.78399	1920.65	8726.49	4.5435
ID_12003819851102016	LT05_120038_20070131	1274.67	T3	9.88507	1926.06	8720.83	4.5278
ID_12003819851102016	LT05_120038_20070320	1274.67	T3	9.54041	1909.4	8481.49	4.44197
ID_12003819851102016	LT05_120038_20090309	1274.67	T3	9.5129	1917.55	8722.75	4.54891
ID_12003819851102016	LT05_120038_20090325	1274.67	T3	9.58659	1926.67	8722.16	4.52706
ID_12003819851102016	LT05_120038_20100328	1274.67	T3	9.60303	1923.8	8721.12	4.53327
ID_12003819851102016	LT05_120038_20101209	1274.67	T3	9.66416	1931.08	7623.91	3.94801
ID_12003819851102016	LT05_120038_20110110	1274.67	T3	9.67475	1926.9	7619.32	3.95418
ID_12003819851102017	LC08_120038_20131115	1288.41	T3	17.9487	2342.55	13106.7	5.59505
ID_12003819851102017	LC08_120038_20131201	1288.41	T3	17.9754	2333.51	13118.8	5.62194
ID_12003819851102017	LC08_120038_20140102	1288.41	T3	17.8642	2343.12	13113.6	5.59665
ID_12003819851102017	LC08_120038_20141118	1288.41	T3	17.5911	2327.31	12981.4	5.57787
ID_12003819851102017	LC08_120038_20141204	1288.41	T3	17.7335	2338.65	13076.8	5.59158
ID_12003819851102017	LC08_120038_20150121	1288.41	T3	17.8563	2344.7	13108.4	5.59068
ID_12003819851102017	LC08_120038_20160124	1288.41	T3	17.7658	2352.36	13073.3	5.55754
ID_12003819851102017	LC08_120038_20160312	1288.41	T3	17.6102	2329.01	13032.7	5.59579
ID_12003819851102017	LC08_120038_20160328	1288.41	T3	17.4973	2328.36	13023	5.59323
ID_12003819851102017	LC08_120038_20161209	1288.41	T3	17.8366	2347.73	13297.3	5.6639
ID_12003819851102017	LC08_120038_20170126	1288.41	T3	17.8411	2347.38	13299.7	5.66579
ID_12003819851102017	LC08_120038_20170211	1288.41	T3	18.0131	2348.6	13320.7	5.67179
ID_12003819851102017	LC08_120038_20170227	1288.41	T3	17.8401	2342.04	13300.2	5.67888
ID_12003819851102017	LC08_120038_20170315	1288.41	T3	17.7373	2329.7	13298.1	5.7081
ID_12003819851102017	LC08_120038_20171126	1288.41	T3	18.0261	2351.83	13349.3	5.67614
ID_12003819851102017	LC08_120038_20171212	1288.41	T3	18.0194	2341.21	13332.8	5.69483
ID_12003819851102017	LE07_120038_19991219	1288.41	T3	18.3548	2394.51	13985.6	5.84069
ID_12003819851102017	LE07_120038_20001103	1288.41	T3	16.8256	2121.24	12097.2	5.70288
ID_12003819851102017	LE07_120038_20001205	1288.41	T3	17.3644	2132.53	12280.6	5.75869
ID_12003819851102017	LE07_120038_20011106	1288.41	T3	17.31	2132.42	12243.4	5.74153
ID_12003819851102017	LE07_120038_20011224	1288.41	T3	18.6511	2445.96	14235.8	5.82011
ID_12003819851102017	LE07_120038_20020210	1288.41	T3	18.7528	2422.92	14186.5	5.85512
ID_12003819851102017	LE07_120038_20020330	1288.41	T3	17.2042	2131.82	12203.1	5.72426
ID_12003819851102017	LE07_120038_20021109	1288.41	T3	17.0513	2106.08	12192.2	5.78907
ID_12003819851102017	LE07_120038_20021227	1288.41	T3	17.5204	2355.02	13316.8	5.65463
ID_12003819851102017	LE07_120038_20030112	1288.41	T3	18.2429	2401.72	13486.1	5.61519
ID_12003819851102017	LE07_120038_20030128	1288.41	T3	18.4305	2407.11	13501.9	5.60916
ID_12003819851102017	LE07_120038_20121104	1288.41	T3	17.7392	2326.79	13021.7	5.5964
ID_12003819851102017	LT04_120038_19890310	1288.41	T3	20.0796	2309.26	12394.4	5.36729
ID_12003819851102017	LT05_120038_19851102	1288.41	T3	20.0105	2322.46	12346.6	5.31616
ID_12003819851102017	LT05_120038_19851118	1288.41	T3	20.2442	2337.45	12408.3	5.30848
ID_12003819851102017	LT05_120038_19851204	1288.41	T3	20.5056	2345.3	12481.1	5.32174
ID_12003819851102017	LT05_120038_19861105	1288.41	T3	20.0206	2317.71	12384	5.3432
ID_12003819851102017	LT05_120038_19861207	1288.41	T3	20.541	2333.84	12522.6	5.36564
ID_12003819851102017	LT05_120038_19861223	1288.41	T3	20.7695	2334.12	12577.3	5.38845
ID_12003819851102017	LT05_120038_19870209	1288.41	T3	21.1355	2380.53	12693.6	5.33226
ID_12003819851102017	LT05_120038_19880331	1288.41	T3	19.9037	2318.38	12358.7	5.33072
ID_12003819851102017	LT05_120038_19881110	1288.41	T3	19.8294	2311.02	12322	5.33185
ID_12003819851102017	LT05_120038_19881212	1288.41	T3	20.5974	2322.58	12444	5.35783
ID_12003819851102017	LT05_120038_19891129	1288.41	T3	19.8098	2304.97	12288.8	5.33145
ID_12003819851102017	LT05_120038_19891215	1288.41	T3	20.2135	2305.8	12394.3	5.37528
ID_12003819851102017	LT05_120038_19901218	1288.41	T3	20.1885	2314.55	12363	5.34142
ID_12003819851102017	LT05_120038_19910103	1288.41	T3	20.0841	2306.26	12361.2	5.35983
ID_12003819851102017	LT05_120038_19910220	1288.41	T3	19.8228	2299.85	12312.2	5.35349
ID_12003819851102017	LT05_120038_19911103	1288.41	T3	19.5771	2304.2	12276.2	5.32774
ID_12003819851102017	LT05_120038_19920223	1288.41	T3	19.8418	2310.27	12318	5.33183
ID_12003819851102017	LT05_120038_19921121	1288.41	T3	19.7097	2310.53	12338.4	5.34007
ID_12003819851102017	LT05_120038_19921223	1288.41	T3	19.7429	2295.06	12353.8	5.38279
ID_12003819851102017	LT05_120038_19930225	1288.41	T3	19.7834	2298.34	12350.4	5.3736
ID_12003819851102017	LT05_120038_19930329	1288.41	T3	19.2994	2283.2	12292	5.3837
ID_12003819851102017	LT05_120038_19931226	1288.41	T3	19.4465	2293.97	12266.2	5.34714
ID_12003819851102017	LT05_120038_19950130	1288.41	T3	19.2773	2298.29	12282.7	5.34429
ID_12003819851102017	LT05_120038_19950319	1288.41	T3	19.2568	2286.4	12334.8	5.39485
ID_12003819851102017	LT05_120038_19960202	1288.41	T3	19.0341	2283.68	12268.9	5.37242
ID_12003819851102017	LT05_120038_19961218	1288.41	T3	18.685	2280.45	12271.2	5.38103
ID_12003819851102017	LT05_120038_19971103	1288.41	T3	18.2565	2255.82	12167.9	5.394
ID_12003819851102017	LT05_120038_19980207	1288.41	T3	18.2172	2250.78	12187.6	5.41486
ID_12003819851102017	LT05_120038_19981106	1288.41	T3	17.6464	2164.56	12204.5	5.6383
ID_12003819851102017	LT05_120038_19981122	1288.41	T3	17.9081	2176.31	12344.9	5.67241
ID_12003819851102017	LT05_120038_19981208	1288.41	T3	18.0994	2209.21	12459	5.63958
ID_12003819851102017	LT05_120038_19991211	1288.41	T3	17.691	2143.7	12689.6	5.91946
ID_12003819851102017	LT05_120038_19991227	1288.41	T3	18.5116	2394.26	14033.1	5.86116
ID_12003819851102017	LT05_120038_20000229	1288.41	T3	18.4176	2400.52	13991.3	5.82844
ID_12003819851102017	LT05_120038_20010215	1288.41	T3	17.8596	2385.86	13852.7	5.80615
ID_12003819851102017	LT05_120038_20020306	1288.41	T3	18.3363	2392.19	14167.5	5.92237
ID_12003819851102017	LT05_120038_20030104	1288.41	T3	17.5878	2364.14	13334.1	5.64014
ID_12003819851102017	LT05_120038_20030205	1288.41	T3	18.2779	2415.49	13476.2	5.57908
ID_12003819851102017	LT05_120038_20031104	1288.41	T3	17.8249	2371.85	13180.9	5.55722
ID_12003819851102017	LT05_120038_20040208	1288.41	T3	18.681	2415.31	13497	5.58812
ID_12003819851102017	LT05_120038_20041106	1288.41	T3	18.0292	2366.64	13191.2	5.5738
ID_12003819851102017	LT05_120038_20041122	1288.41	T3	17.9169	2398.05	13210.3	5.50874
ID_12003819851102017	LT05_120038_20041208	1288.41	T3	18.3096	2394.95	13290	5.54919
ID_12003819851102017	LT05_120038_20060128	1288.41	T3	18.0991	2372.61	13205.7	5.5659
ID_12003819851102017	LT05_120038_20070131	1288.41	T3	18.258	2378.9	13316.6	5.5978
ID_12003819851102017	LT05_120038_20070320	1288.41	T3	17.7219	2364.68	13043.5	5.51598
ID_12003819851102017	LT05_120038_20090309	1288.41	T3	17.7594	2341.13	13031.7	5.56641
ID_12003819851102017	LT05_120038_20090325	1288.41	T3	17.8734	2338.28	13039.9	5.57672
ID_12003819851102017	LT05_120038_20100328	1288.41	T3	17.9063	2353.01	13075.9	5.55709
ID_12003819851102017	LT05_120038_20101209	1288.41	T3	18.0335	2342.96	13113.6	5.59702
ID_12003819851102017	LT05_120038_20110110	1288.41	T3	18.0949	2349.35	13150.9	5.59769
ID_12003819851102018	LC08_120038_20131115	1293.23	T1	1.82152	871.476	3439.18	3.94639
ID_12003819851102018	LC08_120038_20131201	1293.23	T1	1.84675	866.627	3479.7	4.01522
ID_12003819851102018	LC08_120038_20140102	1293.23	T1	1.76872	858.096	3417.41	3.98255
ID_12003819851102018	LC08_120038_20141118	1293.23	T1	1.58698	839.939	3158.38	3.76025
ID_12003819851102018	LC08_120038_20141204	1293.23	T1	1.66718	846.405	3255.25	3.84597
ID_12003819851102018	LC08_120038_20150121	1293.23	T1	1.72876	864.131	3379.23	3.91055
ID_12003819851102018	LC08_120038_20160124	1293.23	T1	1.64964	861.997	3270	3.79351
ID_12003819851102018	LC08_120038_20160312	1293.23	T1	1.59138	844.646	3191.88	3.77896
ID_12003819851102018	LC08_120038_20160328	1293.23	T1	1.53788	833.023	3116.81	3.74157
ID_12003819851102018	LC08_120038_20161209	1293.23	T1	1.70088	882.589	3316.42	3.7576
ID_12003819851102018	LC08_120038_20170126	1293.23	T1	1.70343	880.484	3308.15	3.7572
ID_12003819851102018	LC08_120038_20170211	1293.23	T1	1.77751	888.607	3380.4	3.80416
ID_12003819851102018	LC08_120038_20170227	1293.23	T1	1.70031	882.23	3269.38	3.70582
ID_12003819851102018	LC08_120038_20170315	1293.23	T1	1.64012	854.857	3218.92	3.76544
ID_12003819851102018	LC08_120038_20171126	1293.23	T1	1.78435	877.942	3478.81	3.96246
ID_12003819851102018	LC08_120038_20171212	1293.23	T1	1.80601	888.085	3513.92	3.95674
ID_12003819851102018	LE07_120038_19991219	1293.23	T1	1.71777	793.406	3241.93	4.0861
ID_12003819851102018	LE07_120038_20001103	1293.23	T1	0.967909	682.488	2521.49	3.69456
ID_12003819851102018	LE07_120038_20001205	1293.23	T1	1.4554	780.315	2988.07	3.82931
ID_12003819851102018	LE07_120038_20011106	1293.23	T1	1.44171	776.15	2950.86	3.80192
ID_12003819851102018	LE07_120038_20011224	1293.23	T1	1.77747	831.665	3272.78	3.93522
ID_12003819851102018	LE07_120038_20020210	1293.23	T1	1.80252	838.433	3289.01	3.9228
ID_12003819851102018	LE07_120038_20020330	1293.23	T1	1.38688	762.664	2921.28	3.83036
ID_12003819851102018	LE07_120038_20021109	1293.23	T1	1.29292	764.946	2782.41	3.6374
ID_12003819851102018	LE07_120038_20021227	1293.23	T1	1.47847	784.743	3008.22	3.83338
ID_12003819851102018	LE07_120038_20030112	1293.23	T1	1.69008	808.389	3227.29	3.99225
ID_12003819851102018	LE07_120038_20030128	1293.23	T1	1.76665	814.551	3288.14	4.03675
ID_12003819851102018	LE07_120038_20121104	1293.23	T1	1.6233	832.068	3165.58	3.80448
ID_12003819851102018	LT04_120038_19890310	1293.23	T1	0.977564	526.779	2909.17	5.52256
ID_12003819851102018	LT05_120038_19851102	1293.23	T1	0.577172	437.42	2462.6	5.62984
ID_12003819851102018	LT05_120038_19851118	1293.23	T1	0.735196	458.736	2722.44	5.93465
ID_12003819851102018	LT05_120038_19851204	1293.23	T1	0.933833	495.051	2954.53	5.96813
ID_12003819851102018	LT05_120038_19861105	1293.23	T1	0.731691	459.393	2677.84	5.82908
ID_12003819851102018	LT05_120038_19861207	1293.23	T1	1.09816	545.01	3137.18	5.75618
ID_12003819851102018	LT05_120038_19861223	1293.23	T1	1.24316	596.41	3272.08	5.48628
ID_12003819851102018	LT05_120038_19870209	1293.23	T1	1.47126	666.696	3528.3	5.29222
ID_12003819851102018	LT05_120038_19880331	1293.23	T1	0.825513	484.893	2731.96	5.63415
ID_12003819851102018	LT05_120038_19881110	1293.23	T1	0.772589	486.248	2578.12	5.30206
ID_12003819851102018	LT05_120038_19881212	1293.23	T1	1.37296	635.299	3333.47	5.24708
ID_12003819851102018	LT05_120038_19891129	1293.23	T1	0.874204	517.737	2729.11	5.27123
ID_12003819851102018	LT05_120038_19891215	1293.23	T1	1.19753	600.133	3120.56	5.19979
ID_12003819851102018	LT05_120038_19901218	1293.23	T1	1.34852	656.755	3170.72	4.82786
ID_12003819851102018	LT05_120038_19910103	1293.23	T1	1.30803	634.973	3175.35	5.00076
ID_12003819851102018	LT05_120038_19910220	1293.23	T1	1.05802	558.484	2944.4	5.27213
ID_12003819851102018	LT05_120038_19911103	1293.23	T1	1.02622	566.369	2841.58	5.01719
ID_12003819851102018	LT05_120038_19920223	1293.23	T1	1.30992	658.332	3162.51	4.80383
ID_12003819851102018	LT05_120038_19921121	1293.23	T1	1.38693	677.191	3173.36	4.68606
ID_12003819851102018	LT05_120038_19921223	1293.23	T1	1.51234	708.218	3285.39	4.63895
ID_12003819851102018	LT05_120038_19930225	1293.23	T1	1.56332	719.123	3355.88	4.66662
ID_12003819851102018	LT05_120038_19930329	1293.23	T1	1.05025	579.537	2874.66	4.96026
ID_12003819851102018	LT05_120038_19931226	1293.23	T1	1.41698	692.249	3169.87	4.57909
ID_12003819851102018	LT05_120038_19950130	1293.23	T1	1.33098	678.753	3011.63	4.437
ID_12003819851102018	LT05_120038_19950319	1293.23	T1	1.34559	684.136	3034.66	4.43576
ID_12003819851102018	LT05_120038_19960202	1293.23	T1	1.59858	770.758	3227.05	4.18685
ID_12003819851102018	LT05_120038_19961218	1293.23	T1	1.58084	774.782	3154.51	4.07148
ID_12003819851102018	LT05_120038_19971103	1293.23	T1	1.24825	706.485	2863.58	4.05327
ID_12003819851102018	LT05_120038_19980207	1293.23	T1	1.27839	712.001	2859.16	4.01567
ID_12003819851102018	LT05_120038_19981106	1293.23	T1	1.12875	685.211	2758.66	4.026
ID_12003819851102018	LT05_120038_19981122	1293.23	T1	1.54941	765.253	3159.52	4.12873
ID_12003819851102018	LT05_120038_19981208	1293.23	T1	1.75697	794.103	3289.74	4.14272
ID_12003819851102018	LT05_120038_19991211	1293.23	T1	1.56089	782.132	3081.79	3.94025
ID_12003819851102018	LT05_120038_19991227	1293.23	T1	1.75568	795.777	3261.33	4.0983
ID_12003819851102018	LT05_120038_20000229	1293.23	T1	1.72886	801.233	3244.62	4.04954
ID_12003819851102018	LT05_120038_20010215	1293.23	T1	1.59657	801.905	3137.57	3.91264
ID_12003819851102018	LT05_120038_20020306	1293.23	T1	1.71222	817.763	3233.74	3.95438
ID_12003819851102018	LT05_120038_20030104	1293.23	T1	1.4686	779.021	3025.75	3.88404
ID_12003819851102018	LT05_120038_20030205	1293.23	T1	1.69567	808.287	3226.95	3.99233
ID_12003819851102018	LT05_120038_20031104	1293.23	T1	1.50549	789.079	3052.49	3.86842
ID_12003819851102018	LT05_120038_20040208	1293.23	T1	1.88992	837.542	3413.36	4.07544
ID_12003819851102018	LT05_120038_20041106	1293.23	T1	1.61627	795.732	3140.54	3.94673
ID_12003819851102018	LT05_120038_20041122	1293.23	T1	1.56219	785.095	3068.92	3.90898
ID_12003819851102018	LT05_120038_20041208	1293.23	T1	1.69543	812.872	3225.55	3.96809
ID_12003819851102018	LT05_120038_20060128	1293.23	T1	1.68953	809.939	3219.73	3.97527
ID_12003819851102018	LT05_120038_20070131	1293.23	T1	1.75554	808.33	3278.38	4.05575
ID_12003819851102018	LT05_120038_20070320	1293.23	T1	1.47306	785.242	2981.9	3.79743
ID_12003819851102018	LT05_120038_20090309	1293.23	T1	1.51354	792.456	3004.28	3.7911
ID_12003819851102018	LT05_120038_20090325	1293.23	T1	1.53804	802.635	3058.71	3.81084
ID_12003819851102018	LT05_120038_20100328	1293.23	T1	1.59659	810.643	3124.64	3.85452
ID_12003819851102018	LT05_120038_20101209	1293.23	T1	1.75078	850.967	3342.23	3.92756
ID_12003819851102018	LT05_120038_20110110	1293.23	T1	1.81015	865.716	3408.56	3.93727
ID_12003819851102020	LC08_120038_20131115	1298.04	T1	0.146458	179.792	1290.57	7.17816
ID_12003819851102020	LC08_120038_20131201	1298.04	T1	0.150816	175.062	1345.59	7.68634
ID_12003819851102020	LC08_120038_20140102	1298.04	T1	0.141155	178.436	1205.83	6.75779
ID_12003819851102020	LC08_120038_20141118	1298.04	T1	0.122175	167.158	1136.77	6.80059
ID_12003819851102020	LC08_120038_20141204	1298.04	T1	0.124296	157.586	1147.51	7.28181
ID_12003819851102020	LC08_120038_20150121	1298.04	T1	0.138153	165.085	1209.78	7.32823
ID_12003819851102020	LC08_120038_20160124	1298.04	T1	0.138848	160.968	1179.14	7.32532
ID_12003819851102020	LC08_120038_20160312	1298.04	T1	0.119459	145.02	1130.9	7.79822
ID_12003819851102020	LC08_120038_20160328	1298.04	T1	0.121066	161.524	1102.98	6.82858
ID_12003819851102020	LC08_120038_20161209	1298.04	T1	0.135175	168.296	1159.34	6.88872
ID_12003819851102020	LC08_120038_20170126	1298.04	T1	0.228298	350.726	1662.38	4.73983
ID_12003819851102020	LC08_120038_20170211	1298.04	T1	0.152195	174.828	1191.61	6.81591
ID_12003819851102020	LC08_120038_20170227	1298.04	T1	0.136295	156.135	1129.42	7.23361
ID_12003819851102020	LC08_120038_20170315	1298.04	T1	0.134006	172.682	1157.56	6.70339
ID_12003819851102020	LC08_120038_20171126	1298.04	T1	0.150449	190.534	1289.89	6.76986
ID_12003819851102020	LC08_120038_20171212	1298.04	T1	0.151768	169.301	1322.33	7.81052
ID_12003819851102020	LE07_120038_19991219	1298.04	T1	0.173393	190.493	1399.75	7.34802
ID_12003819851102020	LE07_120038_20001103	1298.04	T1	0.136881	170.824	1198.64	7.01681
ID_12003819851102020	LE07_120038_20001205	1298.04	T1	0.1555	185.769	1258.05	6.77212
ID_12003819851102020	LE07_120038_20011106	1298.04	T1	0.150832	183.902	1249.56	6.79469
ID_12003819851102020	LE07_120038_20011224	1298.04	T1	0.174727	190.493	1374.71	7.21657
ID_12003819851102020	LE07_120038_20020210	1298.04	T1	0.175648	192.851	1403.9	7.27972
ID_12003819851102020	LE07_120038_20020330	1298.04	T1	0.138652	177.851	1241.97	6.98319
ID_12003819851102020	LE07_120038_20021109	1298.04	T1	0.136946	180.582	1179.41	6.53115
ID_12003819851102020	LE07_120038_20021227	1298.04	T1	0.144257	187.602	1271.42	6.77719
ID_12003819851102020	LE07_120038_20030112	1298.04	T1	0.161709	177.098	1333.22	7.52815
ID_12003819851102020	LE07_120038_20030128	1298.04	T1	0.167352	180.616	1350.49	7.47715
ID_12003819851102020	LE07_120038_20121104	1298.04	T1	0.118183	149.964	1191.79	7.94716
ID_12003819851102020	LT04_120038_19890310	1298.04	T1	0.835651	363.226	4085.45	11.2477
ID_12003819851102020	LT05_120038_19851102	1298.04	T1	0.775683	384.625	4009.02	10.4232
ID_12003819851102020	LT05_120038_19851118	1298.04	T1	0.853237	394.757	4082.13	10.3409
ID_12003819851102020	LT05_120038_19851204	1298.04	T1	0.964745	404.73	4199.31	10.3756
ID_12003819851102020	LT05_120038_19861105	1298.04	T1	0.815541	387.755	4061.54	10.4745
ID_12003819851102020	LT05_120038_19861207	1298.04	T1	0.980012	412.367	4702.54	11.4038
ID_12003819851102020	LT05_120038_19861223	1298.04	T1	1.07866	416.04	5046.79	12.1305
ID_12003819851102020	LT05_120038_19870209	1298.04	T1	1.16758	426.826	5254.57	12.3108
ID_12003819851102020	LT05_120038_19880331	1298.04	T1	0.785487	363.147	4062.9	11.188
ID_12003819851102020	LT05_120038_19881110	1298.04	T1	0.744017	352.562	3984.79	11.3024
ID_12003819851102020	LT05_120038_19881212	1298.04	T1	1.03021	398.408	5063.24	12.7087
ID_12003819851102020	LT05_120038_19891129	1298.04	T1	0.755579	340.415	3995.32	11.7366
ID_12003819851102020	LT05_120038_19891215	1298.04	T1	0.856147	357.09	4206.85	11.7809
ID_12003819851102020	LT05_120038_19901218	1298.04	T1	0.848378	371.672	4319.53	11.6219
ID_12003819851102020	LT05_120038_19910103	1298.04	T1	0.846838	363.52	4407.3	12.1239
ID_12003819851102020	LT05_120038_19910220	1298.04	T1	0.789644	349.661	4108.25	11.7492
ID_12003819851102020	LT05_120038_19911103	1298.04	T1	0.738204	345.923	4110.7	11.8833
ID_12003819851102020	LT05_120038_19920223	1298.04	T1	0.797997	354.696	4391.2	12.3802
ID_12003819851102020	LT05_120038_19921121	1298.04	T1	0.773242	356.671	4360.83	12.2265
ID_12003819851102020	LT05_120038_19921223	1298.04	T1	0.802856	349.968	4650.31	13.2878
ID_12003819851102020	LT05_120038_19930225	1298.04	T1	0.843932	347.545	5016.48	14.434
ID_12003819851102020	LT05_120038_19930329	1298.04	T1	0.6825	326.783	4098.93	12.5433
ID_12003819851102020	LT05_120038_19931226	1298.04	T1	0.654311	307.988	4261.56	13.8368
ID_12003819851102020	LT05_120038_19950130	1298.04	T1	0.615528	305.747	4249.74	13.8996
ID_12003819851102020	LT05_120038_19950319	1298.04	T1	0.608989	305.624	4232.28	13.848
ID_12003819851102020	LT05_120038_19960202	1298.04	T1	0.565357	276.716	4482.32	16.1983
ID_12003819851102020	LT05_120038_19961218	1298.04	T1	0.453994	266.482	4301.15	16.1405
ID_12003819851102020	LT05_120038_19971103	1298.04	T1	0.388622	237.401	4168.46	17.5587
ID_12003819851102020	LT05_120038_19980207	1298.04	T1	0.391405	254.28	4154.42	16.338
ID_12003819851102020	LT05_120038_19981106	1298.04	T1	0.242218	217.948	4060.18	18.6291
ID_12003819851102020	LT05_120038_19981122	1298.04	T1	0.253158	240.616	4236.18	17.6056
ID_12003819851102020	LT05_120038_19981208	1298.04	T1	0.268683	241.043	4289.01	17.7936
ID_12003819851102020	LT05_120038_19991211	1298.04	T1	0.164728	198.045	1337.1	6.75152
ID_12003819851102020	LT05_120038_19991227	1298.04	T1	0.181765	195.169	1411.8	7.23373
ID_12003819851102020	LT05_120038_20000229	1298.04	T1	0.174318	206.217	1390.39	6.74237
ID_12003819851102020	LT05_120038_20010215	1298.04	T1	0.169282	194.972	1349.35	6.92074
ID_12003819851102020	LT05_120038_20020306	1298.04	T1	0.170772	194.252	1361.64	7.00963
ID_12003819851102020	LT05_120038_20030104	1298.04	T1	0.145133	181.52	1265.91	6.97394
ID_12003819851102020	LT05_120038_20030205	1298.04	T1	0.162125	179.774	1333.66	7.41855
ID_12003819851102020	LT05_120038_20031104	1298.04	T1	0.13778	169.256	1245.6	7.35928
ID_12003819851102020	LT05_120038_20040208	1298.04	T1	0.179351	180.918	1475.77	8.15715
ID_12003819851102020	LT05_120038_20041106	1298.04	T1	0.140424	165.948	1219.45	7.3484
ID_12003819851102020	LT05_120038_20041122	1298.04	T1	0.140744	171.739	1235.14	7.19196
ID_12003819851102020	LT05_120038_20041208	1298.04	T1	0.152283	171.598	1311.88	7.64508
ID_12003819851102020	LT05_120038_20060128	1298.04	T1	0.150487	174.433	1239.3	7.10472
ID_12003819851102020	LT05_120038_20070131	1298.04	T1	0.154547	177.727	1307.69	7.35785
ID_12003819851102020	LT05_120038_20070320	1298.04	T1	0.124517	159.121	1163.36	7.31118
ID_12003819851102020	LT05_120038_20090309	1298.04	T1	0.128541	164.76	1129.47	6.85523
ID_12003819851102020	LT05_120038_20090325	1298.04	T1	0.136822	180.114	1208.48	6.70953
ID_12003819851102020	LT05_120038_20100328	1298.04	T1	0.13922	178.559	1276.95	7.15143
ID_12003819851102020	LT05_120038_20101209	1298.04	T1	0.14315	166.44	1240.26	7.45167
ID_12003819851102020	LT05_120038_20110110	1298.04	T1	0.153783	177.367	1355.89	7.64456
ID_12003819851102022	LC08_120038_20131115	1298.98	T2	5.52982	1403.99	5589.89	3.98142
ID_12003819851102022	LC08_120038_20131201	1298.98	T2	5.56306	1422.95	5603.19	3.93774
ID_12003819851102022	LC08_120038_20140102	1298.98	T2	5.49537	1402.63	5570.5	3.97147
ID_12003819851102022	LC08_120038_20141118	1298.98	T2	5.23342	1376.85	5461.3	3.96653
ID_12003819851102022	LC08_120038_20141204	1298.98	T2	5.38695	1385.57	5527.02	3.98897
ID_12003819851102022	LC08_120038_20150121	1298.98	T2	5.44091	1396.78	5529.59	3.9588
ID_12003819851102022	LC08_120038_20160124	1298.98	T2	5.28824	1389.61	5557.84	3.99957
ID_12003819851102022	LC08_120038_20160312	1298.98	T2	5.18294	1376.72	5515.5	4.00625
ID_12003819851102022	LC08_120038_20160328	1298.98	T2	4.89873	1380.05	5403.56	3.91548
ID_12003819851102022	LC08_120038_20161209	1298.98	T2	5.41589	1382.79	5743.76	4.15375
ID_12003819851102022	LC08_120038_20170126	1298.98	T2	5.39956	1378.83	5733.58	4.1583
ID_12003819851102022	LC08_120038_20170211	1298.98	T2	5.51771	1381.24	5760.2	4.17031
ID_12003819851102022	LC08_120038_20170227	1298.98	T2	5.39537	1376.13	5713.19	4.15162
ID_12003819851102022	LC08_120038_20170315	1298.98	T2	5.33997	1374.58	5684.79	4.13566
ID_12003819851102022	LC08_120038_20171126	1298.98	T2	5.44647	1377.64	5783.48	4.19809
ID_12003819851102022	LC08_120038_20171212	1298.98	T2	5.45834	1377.69	5830.51	4.23209
ID_12003819851102022	LE07_120038_19991219	1298.98	T2	4.59562	1535.12	4916.44	3.20263
ID_12003819851102022	LE07_120038_20001103	1298.98	T2	2.65185	1270.05	4017.79	3.16348
ID_12003819851102022	LE07_120038_20001205	1298.98	T2	4.32278	1435.51	4681.54	3.26123
ID_12003819851102022	LE07_120038_20011106	1298.98	T2	4.34961	1458.24	4657.64	3.19401
ID_12003819851102022	LE07_120038_20011224	1298.98	T2	4.93921	1535.78	5140.89	3.34741
ID_12003819851102022	LE07_120038_20020210	1298.98	T2	4.96948	1519.22	5158.4	3.39542
ID_12003819851102022	LE07_120038_20020330	1298.98	T2	4.19033	1423.27	4639.55	3.25979
ID_12003819851102022	LE07_120038_20021109	1298.98	T2	3.81959	1346.67	4642.96	3.44773
ID_12003819851102022	LE07_120038_20021227	1298.98	T2	4.487	1431.64	4809.95	3.35976
ID_12003819851102022	LE07_120038_20030112	1298.98	T2	4.91156	1496.02	5012.92	3.35083
ID_12003819851102022	LE07_120038_20030128	1298.98	T2	5.04433	1509.08	5187.05	3.43723
ID_12003819851102022	LE07_120038_20121104	1298.98	T2	5.2941	1394.88	5355.45	3.83935
ID_12003819851102022	LT04_120038_19890310	1298.98	T2	3.22556	1337.51	3825.04	2.85981
ID_12003819851102022	LT05_120038_19851102	1298.98	T2	2.18947	1155.17	3333.03	2.88532
ID_12003819851102022	LT05_120038_19851118	1298.98	T2	2.69413	1188.46	3642.16	3.0646
ID_12003819851102022	LT05_120038_19851204	1298.98	T2	3.09833	1238.81	3826.56	3.0889
ID_12003819851102022	LT05_120038_19861105	1298.98	T2	2.44197	1190.02	3515.36	2.95404
ID_12003819851102022	LT05_120038_19861207	1298.98	T2	3.49623	1369.36	3958.69	2.89091
ID_12003819851102022	LT05_120038_19861223	1298.98	T2	3.76215	1390.81	4226.35	3.03876
ID_12003819851102022	LT05_120038_19870209	1298.98	T2	4.11676	1413.61	4503.81	3.18602
ID_12003819851102022	LT05_120038_19880331	1298.98	T2	2.7489	1250.56	3633.03	2.90512
ID_12003819851102022	LT05_120038_19881110	1298.98	T2	2.51957	1306.31	3431.42	2.6268
ID_12003819851102022	LT05_120038_19881212	1298.98	T2	4.0462	1371.5	4417.12	3.22065
ID_12003819851102022	LT05_120038_19891129	1298.98	T2	2.94702	1335.6	3758.62	2.81418
ID_12003819851102022	LT05_120038_19891215	1298.98	T2	3.8646	1358.02	4326.01	3.18552
ID_12003819851102022	LT05_120038_19901218	1298.98	T2	4.11045	1395.21	4525.14	3.24334
ID_12003819851102022	LT05_120038_19910103	1298.98	T2	4.12462	1394.19	4548.4	3.26239
ID_12003819851102022	LT05_120038_19910220	1298.98	T2	3.6719	1368.45	4176.58	3.05205
ID_12003819851102022	LT05_120038_19911103	1298.98	T2	3.61257	1380.27	4216.77	3.05503
ID_12003819851102022	LT05_120038_19920223	1298.98	T2	4.19453	1400.53	4641.49	3.3141
ID_12003819851102022	LT05_120038_19921121	1298.98	T2	4.37035	1444.45	4785.08	3.31273
ID_12003819851102022	LT05_120038_19921223	1298.98	T2	4.5016	1445.22	4895.57	3.38742
ID_12003819851102022	LT05_120038_19930225	1298.98	T2	4.62899	1445.22	5004.98	3.46313
ID_12003819851102022	LT05_120038_19930329	1298.98	T2	3.75187	1394.04	4390.49	3.14947
ID_12003819851102022	LT05_120038_19931226	1298.98	T2	4.44465	1431.37	4856.55	3.39294
ID_12003819851102022	LT05_120038_19950130	1298.98	T2	4.32925	1434.38	4800.55	3.34677
ID_12003819851102022	LT05_120038_19950319	1298.98	T2	4.31842	1427.73	4843.08	3.39216
ID_12003819851102022	LT05_120038_19960202	1298.98	T2	4.64297	1484.88	5059.47	3.40732
ID_12003819851102022	LT05_120038_19961218	1298.98	T2	4.6383	1464.2	5083.33	3.47174
ID_12003819851102022	LT05_120038_19971103	1298.98	T2	4.02798	1409.01	4701.73	3.33691
ID_12003819851102022	LT05_120038_19980207	1298.98	T2	4.15148	1430.7	4726.09	3.30334
ID_12003819851102022	LT05_120038_19981106	1298.98	T2	3.30669	1298.39	4444.13	3.4228
ID_12003819851102022	LT05_120038_19981122	1298.98	T2	4.32033	1450.32	4793.51	3.30513
ID_12003819851102022	LT05_120038_19981208	1298.98	T2	4.55142	1528.06	4969.46	3.25215
ID_12003819851102022	LT05_120038_19991211	1298.98	T2	4.39319	1477.78	4734.93	3.20407
ID_12003819851102022	LT05_120038_19991227	1298.98	T2	4.66243	1560.79	4988.9	3.1964
ID_12003819851102022	LT05_120038_20000229	1298.98	T2	4.63463	1567.8	4856.06	3.09736
ID_12003819851102022	LT05_120038_20010215	1298.98	T2	4.56312	1525.5	4809.49	3.15272
ID_12003819851102022	LT05_120038_20020306	1298.98	T2	4.83884	1515.82	5096.96	3.3625
ID_12003819851102022	LT05_120038_20030104	1298.98	T2	4.55295	1467.67	4785.45	3.26058
ID_12003819851102022	LT05_120038_20030205	1298.98	T2	4.92045	1492.05	5036.46	3.37553
ID_12003819851102022	LT05_120038_20031104	1298.98	T2	4.69137	1339.84	4972.57	3.71132
ID_12003819851102022	LT05_120038_20040208	1298.98	T2	5.33744	1500.88	5565.72	3.70831
ID_12003819851102022	LT05_120038_20041106	1298.98	T2	4.97736	1384.61	5280.32	3.81357
ID_12003819851102022	LT05_120038_20041122	1298.98	T2	4.90203	1377.46	5161.79	3.74732
ID_12003819851102022	LT05_120038_20041208	1298.98	T2	5.123	1411.23	5363.56	3.80064
ID_12003819851102022	LT05_120038_20060128	1298.98	T2	5.16009	1446.98	5443.16	3.76174
ID_12003819851102022	LT05_120038_20070131	1298.98	T2	5.31541	1464.75	5530.77	3.77591
ID_12003819851102022	LT05_120038_20070320	1298.98	T2	4.7226	1375.11	5016.98	3.64841
ID_12003819851102022	LT05_120038_20090309	1298.98	T2	4.90691	1451.1	5192.11	3.57806
ID_12003819851102022	LT05_120038_20090325	1298.98	T2	4.95954	1443.75	5234.8	3.62584
ID_12003819851102022	LT05_120038_20100328	1298.98	T2	5.08561	1418.08	5326.1	3.75584
ID_12003819851102022	LT05_120038_20101209	1298.98	T2	5.4652	1413.07	5554.63	3.93089
ID_12003819851102022	LT05_120038_20110110	1298.98	T2	5.52664	1429.92	5654.76	3.95459
ID_12003819851102023	LC08_120038_20131115	1315.75	T3	15.6742	2670.17	11883	4.4503
ID_12003819851102023	LC08_120038_20131201	1315.75	T3	15.7198	2687.83	11878.8	4.41948
ID_12003819851102023	LC08_120038_20140102	1315.75	T3	15.6075	2664.98	11888.1	4.46086
ID_12003819851102023	LC08_120038_20141118	1315.75	T3	15.4076	2652.8	11826.5	4.4581
ID_12003819851102023	LC08_120038_20141204	1315.75	T3	15.524	2661.94	11853.5	4.45294
ID_12003819851102023	LC08_120038_20150121	1315.75	T3	15.5894	2675.01	11824.4	4.4203
ID_12003819851102023	LC08_120038_20160124	1315.75	T3	15.7597	2663.56	11801.8	4.43083
ID_12003819851102023	LC08_120038_20160312	1315.75	T3	15.3773	2656.53	11787.8	4.43729
ID_12003819851102023	LC08_120038_20160328	1315.75	T3	15.313	2660.23	11759.4	4.42045
ID_12003819851102023	LC08_120038_20161209	1315.75	T3	15.6418	2675.38	11884.1	4.44202
ID_12003819851102023	LC08_120038_20170126	1315.75	T3	15.8861	2704.15	11844	4.37992
ID_12003819851102023	LC08_120038_20170211	1315.75	T3	15.8382	2775.02	11828.9	4.26264
ID_12003819851102023	LC08_120038_20170227	1315.75	T3	15.6276	2749.25	11849.9	4.31024
ID_12003819851102023	LC08_120038_20170315	1315.75	T3	15.5214	2766.76	11770.7	4.25433
ID_12003819851102023	LC08_120038_20171126	1315.75	T3	15.7898	2794.93	11803.2	4.22309
ID_12003819851102023	LC08_120038_20171212	1315.75	T3	15.8278	2723.92	11893.6	4.36636
ID_12003819851102023	LE07_120038_19991219	1315.75	T3	15.6083	2690.2	11860	4.40857
ID_12003819851102023	LE07_120038_20001103	1315.75	T3	15.1467	2636.01	11710.2	4.4424
ID_12003819851102023	LE07_120038_20001205	1315.75	T3	15.3212	2656.45	11741.1	4.41985
ID_12003819851102023	LE07_120038_20011106	1315.75	T3	15.4356	2648.75	11718.6	4.4242
ID_12003819851102023	LE07_120038_20011224	1315.75	T3	15.7626	2669.05	11865.6	4.44563
ID_12003819851102023	LE07_120038_20020210	1315.75	T3	15.9934	2673.84	11817	4.41949
ID_12003819851102023	LE07_120038_20020330	1315.75	T3	15.4176	2637.67	11745.1	4.45283
ID_12003819851102023	LE07_120038_20021109	1315.75	T3	15.3406	2649.6	11735.8	4.42926
ID_12003819851102023	LE07_120038_20021227	1315.75	T3	15.5467	2659.31	11735.5	4.41301
ID_12003819851102023	LE07_120038_20030112	1315.75	T3	15.6783	2677.06	11816.4	4.41396
ID_12003819851102023	LE07_120038_20030128	1315.75	T3	15.9417	2667.4	11839.9	4.43872
ID_12003819851102023	LE07_120038_20121104	1315.75	T3	15.4486	2656.75	11860.8	4.46442
ID_12003819851102023	LT04_120038_19890310	1315.75	T3	15.4887	2667.03	11717.7	4.39352
ID_12003819851102023	LT05_120038_19851102	1315.75	T3	15.296	2630.59	11711.9	4.45221
ID_12003819851102023	LT05_120038_19851118	1315.75	T3	15.45	2635.56	11721.7	4.44752
ID_12003819851102023	LT05_120038_19851204	1315.75	T3	15.5561	2645.74	11770	4.44867
ID_12003819851102023	LT05_120038_19861105	1315.75	T3	15.2964	2634.78	11710.8	4.44471
ID_12003819851102023	LT05_120038_19861207	1315.75	T3	15.6097	2667.71	11800.2	4.42333
ID_12003819851102023	LT05_120038_19861223	1315.75	T3	15.7979	2670.03	11847.3	4.43714
ID_12003819851102023	LT05_120038_19870209	1315.75	T3	15.955	2669.2	11890.7	4.45477
ID_12003819851102023	LT05_120038_19880331	1315.75	T3	15.3401	2647.85	11713.8	4.4239
ID_12003819851102023	LT05_120038_19881110	1315.75	T3	15.3115	2653.42	11716.8	4.41573
ID_12003819851102023	LT05_120038_19881212	1315.75	T3	15.712	2691.89	11793.8	4.38123
ID_12003819851102023	LT05_120038_19891129	1315.75	T3	15.3222	2654.9	11719.4	4.41425
ID_12003819851102023	LT05_120038_19891215	1315.75	T3	15.493	2668.16	11751.2	4.40424
ID_12003819851102023	LT05_120038_19901218	1315.75	T3	15.6011	2670.5	11813.1	4.42355
ID_12003819851102023	LT05_120038_19910103	1315.75	T3	15.5129	2662.73	11791.7	4.42842
ID_12003819851102023	LT05_120038_19910220	1315.75	T3	15.4229	2641.22	11751.5	4.44927
ID_12003819851102023	LT05_120038_19911103	1315.75	T3	15.3564	2670.04	11719.9	4.38942
ID_12003819851102023	LT05_120038_19920223	1315.75	T3	15.5787	2678.71	11793	4.40249
ID_12003819851102023	LT05_120038_19921121	1315.75	T3	15.5976	2667.43	11815	4.42935
ID_12003819851102023	LT05_120038_19921223	1315.75	T3	15.6538	2663.69	11835.2	4.44318
ID_12003819851102023	LT05_120038_19930225	1315.75	T3	15.6811	2660.62	11807.6	4.43792
ID_12003819851102023	LT05_120038_19930329	1315.75	T3	15.3423	2651.31	11715.3	4.41868
ID_12003819851102023	LT05_120038_19931226	1315.75	T3	15.5135	2667.14	11777.3	4.41569
ID_12003819851102023	LT05_120038_19950130	1315.75	T3	15.6809	2654.62	11753	4.42739
ID_12003819851102023	LT05_120038_19950319	1315.75	T3	15.4489	2651.8	11741.5	4.42776
ID_12003819851102023	LT05_120038_19960202	1315.75	T3	15.6935	2653.58	11843.5	4.46322
ID_12003819851102023	LT05_120038_19961218	1315.75	T3	15.5255	2662.24	11780.7	4.4251
ID_12003819851102023	LT05_120038_19971103	1315.75	T3	15.3248	2643.68	11720.1	4.43325
ID_12003819851102023	LT05_120038_19980207	1315.75	T3	15.4374	2635.62	11710.1	4.443
ID_12003819851102023	LT05_120038_19981106	1315.75	T3	15.1578	2626.3	11706.6	4.45747
ID_12003819851102023	LT05_120038_19981122	1315.75	T3	15.3667	2670.95	11758.4	4.40232
ID_12003819851102023	LT05_120038_19981208	1315.75	T3	15.68	2667.6	11825.4	4.43298
ID_12003819851102023	LT05_120038_19991211	1315.75	T3	15.4969	2673.78	11747.5	4.3936
ID_12003819851102023	LT05_120038_19991227	1315.75	T3	15.6822	2694.73	11853	4.39859
ID_12003819851102023	LT05_120038_20000229	1315.75	T3	15.7	2669.38	11828.5	4.43119
ID_12003819851102023	LT05_120038_20010215	1315.75	T3	15.5093	2662.66	11746.7	4.41165
ID_12003819851102023	LT05_120038_20020306	1315.75	T3	15.6735	2665.16	11787.6	4.42285
ID_12003819851102023	LT05_120038_20030104	1315.75	T3	15.529	2646.13	11753.9	4.44192
ID_12003819851102023	LT05_120038_20030205	1315.75	T3	15.8754	2665.68	11797.8	4.4258
ID_12003819851102023	LT05_120038_20031104	1315.75	T3	15.5561	2653.95	11743.8	4.42504
ID_12003819851102023	LT05_120038_20040208	1315.75	T3	15.9426	2678.6	11880.8	4.43547
ID_12003819851102023	LT05_120038_20041106	1315.75	T3	15.5851	2661.7	11800.2	4.43332
ID_12003819851102023	LT05_120038_20041122	1315.75	T3	15.5078	2653.7	11751.1	4.4282
ID_12003819851102023	LT05_120038_20041208	1315.75	T3	15.6681	2672.59	11795.9	4.41366
ID_12003819851102023	LT05_120038_20060128	1315.75	T3	15.6475	2666.83	11833.8	4.43739
ID_12003819851102023	LT05_120038_20070131	1315.75	T3	15.6017	2658.64	11819	4.44551
ID_12003819851102023	LT05_120038_20070320	1315.75	T3	15.3462	2650.41	11752.7	4.43431
ID_12003819851102023	LT05_120038_20090309	1315.75	T3	15.4101	2658.13	11760.2	4.42425
ID_12003819851102023	LT05_120038_20090325	1315.75	T3	15.4838	2658.18	11800.4	4.43928
ID_12003819851102023	LT05_120038_20100328	1315.75	T3	15.4767	2656.75	11797.5	4.44057
ID_12003819851102023	LT05_120038_20101209	1315.75	T3	15.543	2661.17	11828.1	4.44472
ID_12003819851102023	LT05_120038_20110110	1315.75	T3	15.7154	2696.45	11835	4.3891
ID_12003819851102024	LC08_120038_20131115	1322	T1	1.31823	613.181	3388.19	5.52559
ID_12003819851102024	LC08_120038_20131201	1322	T1	1.32073	624.864	3453.45	5.52672
ID_12003819851102024	LC08_120038_20140102	1322	T1	1.30717	613.425	3385.19	5.5185
ID_12003819851102024	LC08_120038_20141118	1322	T1	1.2336	571.485	3280.31	5.73998
ID_12003819851102024	LC08_120038_20141204	1322	T1	1.25741	585.208	3298.16	5.63587
ID_12003819851102024	LC08_120038_20150121	1322	T1	1.27746	593.913	3306.33	5.56703
ID_12003819851102024	LC08_120038_20160124	1322	T1	1.25459	590.375	3281.06	5.5576
ID_12003819851102024	LC08_120038_20160312	1322	T1	1.19486	567.223	3237.75	5.70807
ID_12003819851102024	LC08_120038_20160328	1322	T1	1.18534	572.784	3230.62	5.64021
ID_12003819851102024	LC08_120038_20161209	1322	T1	1.24691	590.186	3305.06	5.60003
ID_12003819851102024	LC08_120038_20170126	1322	T1	1.2332	586.771	3303.64	5.63021
ID_12003819851102024	LC08_120038_20170211	1322	T1	1.25272	598.722	3343.56	5.5845
ID_12003819851102024	LC08_120038_20170227	1322	T1	1.22881	587.818	3304.11	5.62097
ID_12003819851102024	LC08_120038_20170315	1322	T1	1.19838	574.156	3278.58	5.71026
ID_12003819851102024	LC08_120038_20171126	1322	T1	1.2512	593.138	3344.64	5.63889
ID_12003819851102024	LC08_120038_20171212	1322	T1	1.25526	594.679	3347.28	5.62873
ID_12003819851102024	LE07_120038_19991219	1322	T1	1.50949	667.384	3488.55	5.2272
ID_12003819851102024	LE07_120038_20001103	1322	T1	1.2914	578.405	3227.52	5.58003
ID_12003819851102024	LE07_120038_20001205	1322	T1	1.41086	629.663	3401.9	5.40272
ID_12003819851102024	LE07_120038_20011106	1322	T1	1.40179	656.142	3406.66	5.19195
ID_12003819851102024	LE07_120038_20011224	1322	T1	1.52332	666.6	3563.87	5.34633
ID_12003819851102024	LE07_120038_20020210	1322	T1	1.53173	680.732	3555.47	5.223
ID_12003819851102024	LE07_120038_20020330	1322	T1	1.35154	617.021	3333.8	5.40305
ID_12003819851102024	LE07_120038_20021109	1322	T1	1.3406	613.325	3286.94	5.35921
ID_12003819851102024	LE07_120038_20021227	1322	T1	1.40431	633.057	3413.33	5.39183
ID_12003819851102024	LE07_120038_20030112	1322	T1	1.45907	651.107	3489.55	5.35941
ID_12003819851102024	LE07_120038_20030128	1322	T1	1.48491	653.907	3487.55	5.3334
ID_12003819851102024	LE07_120038_20121104	1322	T1	1.28127	579.525	3324.91	5.7373
ID_12003819851102024	LT04_120038_19890310	1322	T1	1.64802	718.497	3326.08	4.62922
ID_12003819851102024	LT05_120038_19851102	1322	T1	1.62242	727.995	3153.24	4.33141
ID_12003819851102024	LT05_120038_19851118	1322	T1	1.72038	742.668	3280.58	4.41729
ID_12003819851102024	LT05_120038_19851204	1322	T1	1.78409	748.845	3352.03	4.47627
ID_12003819851102024	LT05_120038_19861105	1322	T1	1.62213	717.616	3242.07	4.51784
ID_12003819851102024	LT05_120038_19861207	1322	T1	1.80658	758.466	3419.76	4.50879
ID_12003819851102024	LT05_120038_19861223	1322	T1	1.83205	762.408	3564.71	4.67559
ID_12003819851102024	LT05_120038_19870209	1322	T1	1.93822	785.283	3657.24	4.65722
ID_12003819851102024	LT05_120038_19880331	1322	T1	1.62886	708.825	3288.17	4.6389
ID_12003819851102024	LT05_120038_19881110	1322	T1	1.58445	696.991	3288.36	4.71794
ID_12003819851102024	LT05_120038_19881212	1322	T1	1.82274	750.888	3603.2	4.79858
ID_12003819851102024	LT05_120038_19891129	1322	T1	1.62177	704.297	3396.83	4.823
ID_12003819851102024	LT05_120038_19891215	1322	T1	1.73259	719.678	3565.73	4.95462
ID_12003819851102024	LT05_120038_19901218	1322	T1	1.79674	737.198	3678.88	4.99036
ID_12003819851102024	LT05_120038_19910103	1322	T1	1.75099	725.902	3657.36	5.03837
ID_12003819851102024	LT05_120038_19910220	1322	T1	1.69483	718.23	3570.83	4.97171
ID_12003819851102024	LT05_120038_19911103	1322	T1	1.62757	701.032	3529.45	5.03465
ID_12003819851102024	LT05_120038_19920223	1322	T1	1.73218	722.369	3694.69	5.11468
ID_12003819851102024	LT05_120038_19921121	1322	T1	1.74426	717.134	3727.66	5.198
ID_12003819851102024	LT05_120038_19921223	1322	T1	1.77912	729.521	3747.5	5.13694
ID_12003819851102024	LT05_120038_19930225	1322	T1	1.76427	727.349	3718.36	5.1122
ID_12003819851102024	LT05_120038_19930329	1322	T1	1.6262	694.459	3536.94	5.09309
ID_12003819851102024	LT05_120038_19931226	1322	T1	1.70548	709.953	3719.95	5.23971
[truncated: 5,317 more rows]

## Sheet: Table S2
MCB ID	Type	Distance(km)	Start	End	Area						LWR
					Mean	Standard deviation	Overall	Pre-TGD	Post-TGD	Structural change type	Mean	Standard deviation	Overall	Pre-TGD	Post-TGD	Structural change type
ID_12503919870127001	T1	51.5177	1987	2018	2.52265	0.714993	0.0106	0.0888*	-0.0821	PR	5.39777	0.170059	-0.01**	0.0062	0.004	PD
ID_12403919861203023	T1	85.7552	1986	2018	0.320489	0.115132	-0.0084**	NA	NA	NA	4.25535	1.2479	-0.0829**	0.0151	-0.1141**	PR
ID_12403919861219024	T1	96.7302	1986	2018	0.152599	0.0588652	-0.0012	0.0058	-0.0058*	PR	5.12265	0.684129	0.0147	-0.1003**	0.0476	NR
ID_12403919861203015	T2	109.952	1986	2018	4.01439	0.734747	-0.0617**	-0.0301*	-0.1388**	NA	2.48129	0.0719079	-0.0034*	0.0048*	-0.0078	PR
ID_12403919921117021	T1	121.13	1992	2018	0.131755	0.0750837	-0.0058*	0.0079	-0.0138*	PR	4.44731	0.548773	-0.0009	NA	NA	NA
ID_12403919880208032	T1	121.294	1988	2018	0.427274	0.202411	-0.0005	0.0184*	-0.0368**	PR	3.52243	1.73261	-0.1234**	-0.3651**	0.0052	NR
ID_12403919861219026	T1	126.182	1986	2005	0.235941	0.151132	-0.0157*	NA	NA	NA	3.21796	2.06488	-0.2334*	NA	NA	NA
ID_12403919861203022	T1	129.928	1986	2018	1.46412	0.214649	-0.0159**	-0.03**	0.0033	NR	4.5648	0.277375	-0.0248**	-0.0462**	-0.0133**	ND
ID_12403919861203024	T1	137.202	1986	2017	0.252767	0.148716	-0.0103*	NA	NA	NA	4.67237	0.991268	-0.0617*	NA	NA	NA
ID_12403919861203025	T1	143.229	1986	2018	1.67626	0.237841	0.006	0.0414**	-0.0096*	PR	6.14462	0.613482	-0.0459**	-0.1084**	0.0124*	NR
ID_12403919861203026	T1	145.702	1986	2018	0.537986	0.607626	-0.0519**	-0.1044**	-0.008**	ND	5.34894	1.65493	0.1177**	0.1732**	0.2458**	PA
ID_12403919861203019	T1	160.074	1986	2018	2.28766	0.383335	-0.032**	NA	NA	NA	4.13034	0.375169	-0.0231**	NA	NA	NA
ID_12403919880208028	T1	180.46	1988	2018	1.03249	0.573044	0.0236	0.028	-0.0391	PR	7.0689	1.51662	0.0376	NA	NA	NA
ID_12403919861203017	T1	188.023	1986	2018	1.89076	1.27132	-0.1063**	NA	NA	NA	4.64234	2.25281	0.1755**	NA	NA	NA
ID_12403919861203013	T1	198.425	1986	2018	2.28859	0.928566	-0.0144	0.0726	-0.2015**	PR	4.84996	0.606248	0.0125	-0.0387	0.1152**	NR
ID_12403919861203012	T3	213.374	1986	2018	8.16336	0.999049	0.057**	NA	NA	NA	2.66786	0.165899	0.0025	-0.0032	0.0305**	NR
ID_12403919861203009	T2	250.388	1986	2018	3.55031	1.12847	-0.0424	0.0823*	-0.2181**	PR	5.85905	0.813586	-0.0101	0.0401	-0.1434**	PR
ID_12403919861203008	T2	260.938	1986	2017	3.0234	1.4328	0.0165	NA	NA	NA	3.19252	1.13795	0.1174**	0.0594**	0.236**	PA
ID_12403919861203001	T2	271.323	1986	2018	4.29176	1.80593	0.0156	0.24**	-0.3012**	PR	2.80361	0.744875	-0.0392**	-0.1359**	0.0734**	NR
ID_12403919861203003	T1	287.126	1986	2018	1.34426	1.47139	0.0118	NA	NA	NA	4.60418	1.76432	-0.0831*	NA	NA	NA
ID_12403919871222007	T1	295.279	1987	2008	1.64467	0.89115	0.0845*	NA	NA	NA	4.5541	0.560231	0.0299	NA	NA	NA
ID_12403919890210008	T1	338.826	1989	2018	0.20933	0.0843742	0.0022	NA	NA	NA	4.30715	1.20636	0.0664*	NA	NA	NA
ID_12403919861203005	T3	343.295	1986	2018	10.0931	1.26686	-0.1075**	-0.1471**	0.013	NR	2.36692	0.199447	0.0134**	NA	NA	NA
ID_12304019890126004	T1	372.905	1989	2017	0.132259	0.0695493	-0.0052**	NA	NA	NA	6.25083	2.33104	-0.1966**	NA	NA	NA
ID_12304019890126001	T1	379.924	1989	2018	0.785613	0.16389	-0.0049	0.0323**	-0.0158	PR	4.65943	0.389073	0.0081	-0.0671	0.0148	NR
ID_12304019890126003	T3	391.468	1989	2018	9.21369	0.354851	-0.0209*	0.0015	0.007	PA	2.25226	0.105104	0.0063*	-0.011*	0.0214**	NR
ID_12304019930129001	T1	402.796	1993	2018	0.705632	0.316745	0.0292**	-0.0281	0.0672**	NR	2.931	0.461918	0.046**	NA	NA	NA
ID_12304019890126002	T1	411.044	1989	2018	0.293913	0.128674	0.0077	NA	NA	NA	5.32109	1.4762	-0.1139**	NA	NA	NA
ID_12304019890126006	T2	435.991	1989	2018	4.94885	0.752495	0.0735**	NA	NA	NA	2.90924	0.354218	-0.019*	-0.0459	0.0171	NR
ID_12303919871231002	T1	444.644	1987	2017	1.80814	1.07202	0.1112**	NA	NA	NA	12.5976	4.06802	-0.3445**	-0.7303**	-0.1484	ND
ID_12303919871231001	T2	456.982	1987	2017	4.91245	0.887273	-0.0591**	0.0265	-0.0259	PR	9.40706	1.98213	-0.1908**	NA	NA	NA
ID_12303919871231003	T3	467.813	1987	2017	13.1794	1.44204	-0.0694*	-0.324**	0.103*	NR	5.39081	0.869714	0.057**	-0.0789**	0.0209	NR
ID_12303919871231007	T1	480.093	1987	2017	0.586592	0.481905	0.0324**	-0.0066	0.1038**	NR	8.04698	4.96461	-0.2262*	-0.6848*	0.4136*	NR
ID_12303919871231008	T1	482.167	1987	1996	0.0945142	0.0322634	-0.0103**	NA	NA	NA	8.74999	0.741109	-0.0109	NA	NA	NA
ID_12303919871231009	T2	493.921	1987	2017	6.16249	2.06848	0.2094**	0.2968**	0.1433**	PD	2.30852	0.44392	-0.038**	-0.0844**	-0.0092	ND
ID_12303919871231015	T3	520.122	1987	2017	11.9476	0.67445	0.0123	NA	NA	NA	3.38462	0.131042	-0.0084**	NA	NA	NA
ID_12303919930129002	T1	534.129	1993	2017	2.1945	0.962351	0.0434	0.2807**	-0.1401**	PR	4.96822	1.37719	0.1674**	-0.031	0.2523**	NR
ID_12303919871231018	T1	534.315	1987	1996	1.27294	1.04159	-0.3237**	NA	NA	NA	9.96659	2.29573	0.5058*	NA	NA	NA
ID_12303919871231019	T1	553.596	1987	2017	1.55616	0.358923	0.0247**	NA	NA	NA	6.57549	0.898953	-0.0534**	NA	NA	NA
ID_12303919871231020	T2	570.073	1987	2017	6.0381	0.273471	-0.0146**	NA	NA	NA	1.32774	0.0457206	0.0042**	0.001	0.0051**	PA
ID_12303919871231022	T1	611.879	1987	2017	1.97697	0.267109	-0.005	0.0156	-0.0544**	PR	3.34537	0.404228	-0.0242**	-0.055**	0.0361	NR
ID_12303919871231023	T1	632.507	1987	2017	1.3673	0.350468	-0.0252**	0.0216*	-0.0747**	PR	7.05194	0.551744	-0.0213	0.0572**	-0.137**	PR
ID_12303919871231024	T3	660.103	1987	2017	24.015	1.37608	-0.0108	NA	NA	NA	5.48846	0.296687	0.0142*	NA	NA	NA
ID_12303919871231026	T1	673.514	1987	2017	0.235273	0.126681	0.0004	NA	NA	NA	8.49536	1.29757	0.005	NA	NA	NA
ID_12203919870207021	T1	698.933	1987	2018	0.894039	0.586616	-0.0161	NA	NA	NA	6.02052	2.17007	-0.1035*	NA	NA	NA
ID_12203919870207024	T3	710.305	1987	2018	26.1233	1.85258	0.1664**	-0.0037	0.2221**	NR	1.67718	0.197173	0.0182**	NA	NA	NA
ID_12203919870207022	T1	711.712	1987	2018	1.47039	0.534788	0.034**	NA	NA	NA	4.90658	0.985675	-0.0258	NA	NA	NA
ID_12203919870207020	T1	713.733	1987	2003	0.318874	0.16809	-0.0326**	NA	NA	NA	11.5212	5.23665	0.9622**	NA	NA	NA
ID_12203919870207018	T2	728.745	1987	2018	3.77492	1.14251	0.0726**	0.0753	-0.028	PR	3.91111	1.61648	-0.0888**	-0.3056**	-0.0045	ND
ID_12203919870207016	T1	730.747	1987	1997	0.205075	0.122525	-0.0338**	NA	NA	NA	4.99643	0.827102	0.1817*	NA	NA	NA
ID_12203919870207014	T1	741.908	1987	2018	0.746551	0.270703	0.0001	-0.0055	-0.0391*	NA	3.93988	0.707183	-0.0077	NA	NA	NA
ID_12203919870207015	T3	755.269	1987	2018	19.8506	1.08958	-0.014	-0.1493*	0.1721**	NR	3.5331	0.0917509	0.0043*	NA	NA	NA
ID_12203919870207013	T1	761.891	1987	2018	1.55013	0.490829	-0.0019	NA	NA	NA	2.99855	0.685562	-0.0349*	0.0631	-0.035	PR
ID_12203919870207012	T2	786.503	1987	2018	5.50432	0.840357	-0.0463**	NA	NA	NA	6.68556	0.298153	0.0047	-0.0287	0.0033	NR
ID_12203919870207010	T1	804.955	1987	2018	1.70976	0.677106	0.0347*	NA	NA	NA	4.95119	1.41484	0.1244**	0.0974	0.0402	PD
ID_12203919870207008	T1	830.611	1987	2018	0.390234	0.257998	-0.0127*	-0.0521**	0.0091	NR	6.56534	1.40647	-0.004	0.2123**	-0.2458**	PR
ID_12203919870207005	T3	857.163	1987	2018	27.0679	1.67838	0.1113**	NA	NA	NA	2.20896	0.288279	0.0192**	-0.0106	0.0448**	NR
ID_12203920040121001	T1	866.316	2004	2018	0.960658	0.519335	0.0997**	NA	NA	NA	5.76076	1.57076	-0.1578	NA	NA	NA
ID_12203919870207002	T2	872.499	1987	2018	6.25978	2.15581	-0.1725**	NA	NA	NA	7.42914	0.934238	-0.0718**	NA	NA	NA
ID_12103919871201001	T2	904.767	1987	2018	5.29849	0.578718	-0.0136	NA	NA	NA	5.25118	0.342348	0.0159*	NA	NA	NA
ID_12103919871201002	T4	905.182	1987	2018	85.14	1.89125	0.1282**	NA	NA	NA	2.52584	0.0376667	0.0027**	NA	NA	NA
ID_12103919890213001	T1	908.427	1989	2018	0.884943	0.217167	0.0021	NA	NA	NA	6.26327	1.91584	0.0915*	0.3443**	0.1092	PD
ID_12103919871201004	T1	910.021	1987	2018	0.791156	0.243252	-0.0065	NA	NA	NA	7.09271	1.24187	0.0326	NA	NA	NA
ID_12103919890213005	T1	916.684	1989	2015	0.298992	0.163702	0.0171**	NA	NA	NA	11.5235	3.89495	0.3686**	NA	NA	NA
ID_12103919890213006	T1	920.343	1989	2005	0.0754523	0.0132271	-0.0019**	NA	NA	NA	5.52585	0.242355	0.0152	NA	NA	NA
ID_12103919871201036	T2	928.197	1987	2018	5.8841	1.23906	0.0549*	NA	NA	NA	4.59387	0.941676	-0.03	NA	NA	NA
ID_12103919871201007	T3	939.842	1987	2018	9.18509	1.27813	0.0842**	0.1662*	-0.0189	PR	3.92579	0.324864	0.0195**	0.032	-0.0124	PR
ID_12103919890213014	T1	945.992	1989	2017	0.146329	0.0494887	-0.0032*	NA	NA	NA	8.99249	1.1928	0.0662*	NA	NA	NA
ID_12103919890213015	T1	951.747	1989	2018	0.620811	0.504736	0.052**	0.013*	0.0815**	PA	13.8441	6.44132	-0.4248**	0.6773	-0.4616**	PR
ID_12103919930131014	T1	956.532	1993	2018	1.23786	0.527159	0.0676**	NA	NA	NA	5.57581	1.08953	0.1081**	-0.0005	0.2394**	NR
ID_12103919871201008	T1	958.458	1987	1997	1.35989	0.830997	-0.1813*	NA	NA	NA	4.46943	0.621908	0.163**	NA	NA	NA
ID_12103919871201009	T4	960.743	1987	2018	76.5806	2.75251	0.2365**	0.3753**	-0.0361	PR	1.97071	0.0263717	0.0017**	0.0044**	-0.0021**	PR
ID_12103919871201011	T2	967.706	1987	2018	3.81734	0.198662	-0.011**	-0.0319**	0.0009	NR	3.58718	0.128993	-0.0106**	NA	NA	NA
ID_12103919871201012	T1	978.249	1987	2018	1.00549	0.486603	-0.0077	NA	NA	NA	12.6783	3.69501	-0.2386**	NA	NA	NA
ID_12103919871201017	T1	987.184	1987	2018	2.15814	0.83878	0.0582**	0.1414**	-0.0484**	PR	5.83386	2.24656	-0.1113*	-0.5154**	0.1437**	NR
ID_12103920020108025	T1	989.135	2002	2018	0.747832	0.614164	0.1081**	NA	NA	NA	5.67237	3.30293	-0.2929	NA	NA	NA
ID_12103919871201016	T1	990.89	1987	2015	0.745904	0.572599	-0.0644**	NA	NA	NA	4.50352	0.581944	0.0242	0.0589**	-0.1119	PR
ID_12103919890213025	T1	995.084	1989	1997	0.392144	0.153365	-0.0303	NA	NA	NA	4.4147	0.837174	-0.1675	NA	NA	NA
ID_12103919871201018	T3	995.259	1987	2018	12.6478	1.5163	0.0487	0.238*	-0.0866**	PR	4.27882	0.416372	0.0174*	-0.0258	0.088**	NR
ID_12103919871201021	T1	1003.53	1987	2018	0.447035	0.0675819	-0.0052**	-0.0085**	-0.0102**	NA	6.77315	0.531992	0.0454**	NA	NA	NA
ID_12103919871201022	T2	1005.08	1987	2018	4.48958	0.488864	0.018	NA	NA	NA	4.32937	0.311274	-0.0086	0.0252	-0.0232*	PR
ID_12103919890213031	T1	1013.51	1989	2018	0.131859	0.0418828	-0.0026**	-0.0078**	0.0007	NR	15.8365	5.68774	0.2918*	1.1474**	-0.5379**	PR
ID_12103919871201023	T3	1018.73	1987	2018	20.9623	1.93855	0.1606**	0.264**	0.0126	PD	2.29009	0.130111	0.0128**	0.0221**	0.0062**	PD
ID_12103919871201025	T1	1023.6	1987	2018	2.13334	0.144427	0.0087**	NA	NA	NA	3.51587	0.23376	0.0157**	0.0431**	-0.0014	PR
ID_12103919890213002	T2	1046.97	1989	2018	4.58215	2.49033	0.275**	0.3667**	0.1388**	PD	2.93424	0.617595	-0.055**	-0.1169**	-0.0122*	ND
ID_12103919871201029	T3	1050.02	1987	2018	30.5317	3.40648	-0.2786**	-0.5988**	-0.1175**	ND	1.65742	0.139269	0.014**	NA	NA	NA
ID_12103919871201027	T1	1062.98	1987	2018	0.429755	0.0249178	0.0009	NA	NA	NA	2.30889	0.108875	0.0089**	NA	NA	NA
ID_12103919871201028	T3	1068.72	1987	2018	16.5014	0.505568	0.014	NA	NA	NA	1.40532	0.120872	0.0102**	0.0191**	0.0011	PD
ID_12103919970110043	T1	1069.71	1997	2015	0.67114	0.285362	-0.0013	0.139**	-0.0738**	PR	3.57062	1.39566	0.0854	NA	NA	NA
ID_12103919871201030	T4	1088.69	1987	2018	32.91	2.60919	0.2313**	0.3803**	0.0484	PD	2.72306	0.134093	-0.0029	0.013	-0.0065	PR
ID_12103919871201035	T1	1092.85	1987	2018	1.96246	0.866506	-0.0806**	NA	NA	NA	4.20758	0.594683	-0.0253*	-0.1082**	0.016	NR
ID_12103919871201034	T3	1093.99	1987	2018	15.587	0.45664	0.0216*	0.0338	-0.0332*	PR	2.60506	0.177714	-0.0062	-0.0293**	0.0328**	NR
ID_12103919871201033	T3	1094.56	1987	2018	7.70927	0.201666	-0.0149**	-0.0367**	-0.0169**	ND	3.79539	0.0933179	-0.0074**	-0.0168**	-0.0013	ND
ID_12103919890213044	T1	1099.54	1989	2004	0.0935343	0.0195121	0.0034**	NA	NA	NA	4.31501	0.550961	-0.0305	NA	NA	NA
ID_12003919861207001	T2	1115.4	1986	2017	3.66066	0.474552	-0.0168	0.0322	-0.0727**	PR	2.71778	0.239745	-0.0192**	-0.0025	-0.0268*	NA
ID_12003919861105001	T2	1118.24	1986	2017	6.2002	0.13997	-0.0119**	-0.0281**	-0.0021	ND	2.28631	0.03126	-0.003**	-0.0055**	-0.0013*	ND
ID_12003919861105002	T3	1136.87	1986	2017	30.8014	0.578629	0.0122	-0.0591*	0.008	NR	4.60913	0.1292	-0.0034	-0.0078	0.0218**	NR
ID_12003919861105004	T1	1145.68	1986	2017	2.09894	0.268179	0.0137**	NA	NA	NA	4.47494	0.489953	-0.0293**	0.0131	0.0154	PA
ID_12003919861105005	T1	1149.96	1986	2017	2.26359	0.210271	-0.0214**	-0.0289**	-0.0192**	ND	4.72514	0.151082	-0.012**	-0.0278**	0.002	NR
ID_12003820040208001	T1	1171.99	2004	2017	0.562062	0.218047	0.0361*	NA	NA	NA	4.04505	0.717431	-0.0156	NA	NA	NA
ID_12003819851102001	T4	1193.58	1985	2017	35.8113	1.09923	0.0673**	0.1118**	-0.0744	PR	2.0503	0.107533	-0.0086**	-0.0164**	0.0005	NR
ID_12003819870209003	T1	1214.31	1987	2017	2.17352	0.888349	0.084**	0.1383**	-0.0158	PR	5.87009	2.58646	-0.227**	-0.4653**	-0.1097*	ND
ID_12003819851204003	T1	1237.83	1985	2017	1.30093	0.683255	0.0603**	NA	NA	NA	3.06534	0.655839	-0.0577**	-0.0945**	-0.0403	ND
ID_12003819851102005	T3	1243.15	1985	2017	12.9458	1.13171	-0.0907**	-0.0718**	-0.2377**	NA	2.85165	0.283512	-0.027**	-0.0148**	-0.0324**	NA
ID_12003819960202010	T1	1256.07	1996	2017	2.00962	1.28232	0.1862**	0.0721*	0.1503**	PA	10.955	0.86997	-0.0803**	NA	NA	NA
ID_12003819851102008	T4	1260.58	1985	2017	59.7864	1.51864	-0.1405**	NA	NA	NA	3.07116	0.05562	0.0047**	NA	NA	NA
ID_12003819921121008	T1	1266.96	1992	2017	1.22131	0.583807	0.063**	0.1529**	0.0078	PD	4.39187	1.38416	0.0049	NA	NA	NA
ID_12003819851102012	T2	1269.64	1985	2017	3.64422	0.519956	-0.0496**	-0.0727**	-0.036**	ND	3.30453	0.343488	-0.0254**	0.0011	-0.0502*	PR
ID_12003819851102016	T3	1274.67	1985	2017	9.79505	0.232271	-0.0187**	NA	NA	NA	3.81884	0.529947	0.0376**	0.0937**	-0.0566**	PR
ID_12003819851102015	T1	1279.07	1985	1998	0.735688	0.463656	-0.1061**	NA	NA	NA	7.63649	2.66051	0.597**	NA	NA	NA
ID_12003819901218016	T1	1287.58	1990	2017	1.0571	0.608487	0.0696**	0.0447**	0.0678**	PA	4.83075	0.891776	-0.0659**	NA	NA	NA
ID_12003819851102017	T3	1288.41	1985	2017	18.673	1.04657	-0.0918**	-0.1821**	-0.0251**	ND	5.52538	0.156265	0.0104**	0.0272**	0.0034	PD
ID_12003819851102018	T1	1293.23	1985	2017	1.47255	0.243167	0.0222**	0.0341**	0.0057	PD	4.32698	0.632052	-0.0546**	-0.1139**	-0.0091**	ND
ID_12003819851102020	T1	1298.04	1985	2017	0.40381	0.334031	-0.0298**	-0.0552**	-0.0009	ND	9.83602	3.30491	-0.2206**	NA	NA	NA
ID_12003819851102022	T2	1298.98	1985	2017	4.52497	0.743388	0.0707**	NA	NA	NA	3.48279	0.35922	0.0343**	0.0207**	0.0365**	PA
ID_12003819851118021	T1	1311.95	1985	2017	0.407619	0.203823	0.0077	-0.017*	0.0284	NR	8.60922	3.09845	0.1245*	0.4452**	-0.6884**	PR
ID_12003819851102023	T3	1315.75	1985	2017	15.5592	0.0859969	0.0015	NA	NA	NA	4.42632	0.0216864	-0.0005	NA	NA	NA
ID_12003819851102024	T1	1322	1985	2017	1.4962	0.191317	-0.0186**	-0.0232**	-0.0137**	ND	5.25597	0.345047	0.0325**	0.0464**	0.0156**	PD
ID_12003819851102027	T4	1336.72	1985	2017	57.5905	0.184502	0.0088**	NA	NA	NA	1.38334	0.0038644	-0.0002**	0.0002*	-0.0008**	PR
ID_12003819851102025	T2	1354.54	1985	2017	5.09131	0.127359	-0.0105**	-0.0035	-0.0243**	NA	4.89499	0.0926472	0.0041*	-0.001	0.0194**	NR
ID_12003819991219025	T1	1358.32	1999	2017	0.0764499	0.0169908	0.0024**	NA	NA	NA	2.52158	0.562678	-0.0726**	-0.1145*	-0.1067**	ND
ID_12003819851102028	T3	1385.9	1985	2017	30.6527	0.480944	0.036**	0.0014	0.0309	PA	3.28069	0.0378465	0.0015*	NA	NA	NA
ID_12003819851102031	T3	1403.04	1985	2017	26.0113	2.51826	0.1957**	0.3096**	-0.1045*	PR	2.80599	0.145252	-0.0114**	NA	NA	NA
ID_12003819851102033	T1	1413.93	1985	2017	1.03657	0.172208	0.0004	NA	NA	NA	1.83913	0.199009	0.0121**	NA	NA	NA
ID_12003819851102002	T3	1413.95	1985	2017	18.8973	0.342871	0.0252**	0.0096	-0.0043	PR	1.43356	0.0217499	-0.0012**	-0.0003	0.0019**	NR
ID_11903819850111019	T2	1433.18	1985	2018	4.5542	0.453943	0.0421**	0.0562**	0.0118	PD	4.1353	0.584765	0.0418**	-0.0263	0.0629**	NR
ID_11903819850111020	T1	1436.09	1985	2018	0.575258	0.132289	0.0104**	0.0094**	-0.0091**	PR	4.31586	0.781659	-0.0524**	-0.1436**	0.072**	NR
ID_11903819850111016	T4	1447.51	1985	2018	223.034	1.36731	0.1265**	0.1024**	0.0583*	PD	2.48571	0.0080093	0.0006**	0.0006*	0.0016**	PA
ID_11903819850111017	T1	1448.13	1985	2018	1.99601	0.0502521	0.0036**	0.0079**	0.0004	PD	1.68836	0.096978	-0.0086**	-0.0156**	0.0006	NR
ID_11903819850111009	T2	1466.27	1985	2018	6.72864	0.939529	0.0769**	0.1605**	0.0145	PD	6.71743	0.590081	-0.0242*	-0.0226	0.0683**	NR
ID_11903819850111013	T3	1467.98	1985	2018	19.4741	0.0885051	-0.0043**	NA	NA	NA	2.11737	0.0554758	-0.0044**	-0.0005	-0.0125**	NA
ID_11903819850111005	T2	1474.24	1985	2018	4.33663	0.0928108	-0.0014	NA	NA	NA	3.5801	0.0601277	-0.0036**	NA	NA	NA
ID_11903819850111003	T1	1478.59	1985	2018	1.03393	0.339288	0.0299**	0.0447**	-0.0046	PR	3.34977	0.65456	0.0576**	0.0541**	0.0026	PD
ID_11903819981217017	T1	1480.15	1998	2010	0.110574	0.0357715	0.0028	NA	NA	NA	3.58335	0.858098	-0.0755	-0.25	-0.2181	ND
ID_11903819850111008	T3	1517.14	1985	2018	20.6527	1.15596	0.092**	0.1814**	-0.0545*	PR	2.01527	0.0790731	0.0066**	0.0129**	-0.0023*	PR
ID_11903819850111010	T3	1532.28	1985	2018	11.9314	0.82478	0.0402**	NA	NA	NA	3.1944	0.622238	0.0508**	NA	NA	NA
ID_11903819850111006	T4	1539.46	1985	2018	45.305	8.2073	0.8075**	0.9696**	0.7772**	PD	1.67892	0.189732	0.0179**	NA	NA	NA
ID_11903819850111002	T2	1559.06	1985	2018	4.98612	2.27651	0.2141**	0.1884**	0.0613	PD	2.68778	0.507541	-0.0123	-0.084**	0.0773**	NR
ID_11903819981217004	T1	1573.13	1998	2018	0.360908	0.106624	0.0055	NA	NA	NA	4.55979	0.773275	0.0873**	NA	NA	NA
ID_11903819920216001	T1	1578.92	1992	2018	0.636043	0.378089	0.0443**	NA	NA	NA	1.56816	0.365231	-0.0142	-0.0614*	0.0537**	NR
